# Supplementary material for: Three-component synthesis of C2F5-substituted pyrazoles from C2F5CH2NH2·HCl, NaNO2 and electron-deficient alkynes
Source: publisher site journal article supplement (doi:10.3762/bjoc.11.3), 2015-01-06
Supplement: Additional file 1 [file 1860-5397-11-3-S1.pdf]

**Supporting Information  
for**

**Three-component synthesis of C<sub>2</sub>F<sub>5</sub>-substituted pyrazoles from  
C<sub>2</sub>F<sub>5</sub>CH<sub>2</sub>NH<sub>2</sub>·HCl, NaNO<sub>2</sub> and electron-deficient alkynes**

Pavel K. Mykhailiuk

Address: Enamine Ltd., Vul. Oleksandra Matrosova 23, 01103 Kyiv, Ukraine; and Department of  
Chemistry, Taras Shevchenko National University of Kyiv, Volodymyrska Street, 64, Kyiv 01601,  
Ukraine

Email: Pavel K. Mykhailiuk - Pavel.Mykhailiuk@gmail.com

**Experimental procedures and copies of NMR spectra for all new compounds**

### Experimental part

Dichloromethane was purified by distillation. All reagents were available from Enamine Ltd. Melting points are uncorrected. <sup>1</sup>H- and <sup>13</sup>C-NMR spectra were recorded on a Bruker Avance 500 spectrometer (at 499.9 MHz and 124.9 MHz, respectively). <sup>19</sup>F-NMR spectra were recorded on a Varian Unity Plus 400 spectrometer (at 376.7 Hz). Chemical shifts are reported in ppm downfield from Me<sub>4</sub>Si (<sup>1</sup>H, <sup>13</sup>C) or upfield from CFCl<sub>3</sub> (<sup>19</sup>F) using conventional deuterium lock referencing as internal standards. MS analysis was performed on an LCMS instrument with chemical ionization.

**General procedure:** To a stirred suspension of C<sub>2</sub>F<sub>5</sub>CH<sub>2</sub>NH<sub>2</sub>·HCl (90 mg, 0.48 mmol, 3.0 eq.) in CH<sub>2</sub>Cl<sub>2</sub> (4.0 mL) / water (0.2 mL), sodium nitrite (54 mg, 0.78 mmol, 5.0 eq.) and alkyne (0.16 mmol, 1.0 eq.) was added. The reaction mixture was vigorously stirred 72 h at 20 °C. Water (1.0 mL) and CH<sub>2</sub>Cl<sub>2</sub> (3 mL) were added. The organic layer was separated. The aqueous layer was washed with CH<sub>2</sub>Cl<sub>2</sub> (2 × 3 mL). The combined organic layers were dried over Na<sub>2</sub>SO<sub>4</sub> and evaporated under vacuum to provide the pure product.

#### Methyl 3-(pentafluoroethyl)-1H-pyrazole-5-carboxylate (1a)

Compound **1a** was obtained as a white solid (39 mg, 99%) following the general procedure. M.p. = 79-80 °C.

<sup>1</sup>H NMR (500 MHz; CDCl<sub>3</sub>; Me<sub>4</sub>Si), δ: 11.81 (broad s, 1H, NH), 7.11 (s, 1H, CH), 3.96 (s, 3H, CH<sub>3</sub>).

<sup>13</sup>C NMR (125 MHz; CDCl<sub>3</sub>; Me<sub>4</sub>Si), δ: 159.0 (s, CO), 142.8 (broad s, C), 135.5 (broad s, C), 118.6 (qt, <sup>1</sup>J<sub>C-F</sub> = 285.0 Hz, <sup>2</sup>J<sub>C-F</sub> = 36.3 Hz, CF<sub>2</sub>CF<sub>3</sub>), 110.2 (tq, <sup>1</sup>J<sub>C-F</sub> = 250.0 Hz, <sup>2</sup>J<sub>C-F</sub> = 38.9 Hz, CF<sub>2</sub>CF<sub>3</sub>), 108.6 (s, CH), 52.7 (s, CH<sub>3</sub>).

<sup>19</sup>F NMR (375 MHz; CDCl<sub>3</sub>; CFCl<sub>3</sub>), δ: -85.1 (s, 3F, CF<sub>2</sub>CF<sub>3</sub>), -113.8 (s, 2F, CF<sub>2</sub>CF<sub>3</sub>).

MS (CI): *m/z* (%) = 245 [M+1]<sup>+</sup>.

Anal. calcd for C<sub>7</sub>H<sub>5</sub>F<sub>5</sub>N<sub>2</sub>O<sub>2</sub>: C, 34.44; H, 2.06; N, 11.48. Found: C, 34.14; H, 2.34; N, 11.68.

#### Ethyl 3-(pentafluoroethyl)-1H-pyrazole-5-carboxylate (2a)

Compound **2a** was obtained as a white solid (41 mg, 98%) following the general procedure. M.p. = 90 °C.

<sup>1</sup>H NMR (500 MHz; CDCl<sub>3</sub>; Me<sub>4</sub>Si), δ: 11.89 (broad s, 1H, NH), 7.13 (s, 1H, CH), 4.45 (q, *J* = 7.0 Hz, 2H, CH<sub>2</sub>CH<sub>3</sub>), 1.42 (t, *J* = 7.0 Hz, 3H, CH<sub>2</sub>CH<sub>3</sub>).

<sup>13</sup>C NMR (125 MHz; CDCl<sub>3</sub>; Me<sub>4</sub>Si), δ: 158.3 (s, CO), 142.2 (broad s, C), 135.4 (broad s, C), 118.3 (qt, <sup>1</sup>J<sub>C-F</sub> = 285.3 Hz, <sup>2</sup>J<sub>C-F</sub> = 36.3 Hz, CF<sub>2</sub>CF<sub>3</sub>), 109.8 (tq, <sup>1</sup>J<sub>C-F</sub> = 250.0 Hz, <sup>2</sup>J<sub>C-F</sub> = 38.0 Hz, CF<sub>2</sub>CF<sub>3</sub>), 108.2 (s, CH), 61.8 (s, OCH<sub>2</sub>), 13.7 (s, CH<sub>3</sub>).

<sup>19</sup>F NMR (375 MHz; CDCl<sub>3</sub>; CFCl<sub>3</sub>), δ: -85.1 (t, <sup>3</sup>*J*(F,F) = 3.8 Hz, 3F, CF<sub>2</sub>CF<sub>3</sub>), -113.8 (q, <sup>3</sup>*J*(F,F) = 3.8 Hz, 2F, CF<sub>2</sub>CF<sub>3</sub>).

MS (CI): *m/z* (%) = 259 [M+1]<sup>+</sup>.

Anal. calcd for C<sub>8</sub>H<sub>7</sub>F<sub>5</sub>N<sub>2</sub>O<sub>2</sub>: C, 37.22; H, 2.73; N, 10.85. Found: C, 37.51; H, 3.02; N, 10.74.

#### Isopropyl 3-(pentafluoroethyl)-1H-pyrazole-5-carboxylate (3a)

Compound **3a** was obtained as a white solid (42 mg, 97%) following the general procedure. M.p. = 85-86 °C.

$^1\text{H}$  NMR (500 MHz;  $\text{CDCl}_3$ ;  $\text{Me}_4\text{Si}$ ),  $\delta$ : 7.12 (s, 1H, CH), 5.31 (m,  $J = 6.5$  Hz, 1H, CHCH<sub>3</sub>), 1.38 (6,  $J = 6.5$  Hz, 6H, CHCH<sub>3</sub>).

$^{13}\text{C}$  NMR (125 MHz;  $\text{CDCl}_3$ ;  $\text{Me}_4\text{Si}$ ),  $\delta$ : 158.0 (s, CO), 141.8 (t,  $^2J_{\text{C-F}} = 30.0$  Hz, CCF<sub>2</sub>), 135.7 (broad s, C), 118.2 (qt,  $^1J_{\text{C-F}} = 285.3$  Hz,  $^2J_{\text{C-F}} = 36.3$  Hz, CF<sub>2</sub>CF<sub>3</sub>), 109.9 (tq,  $^1J_{\text{C-F}} = 250.0$  Hz,  $^2J_{\text{C-F}} = 38.0$  Hz, CF<sub>2</sub>CF<sub>3</sub>), 108.1 (s, CH), 70.1 (s, OCH), 21.3 (s, CH<sub>3</sub>).

$^{19}\text{F}$  NMR (375 MHz;  $\text{CDCl}_3$ ;  $\text{CFCl}_3$ ),  $\delta$ : -85.1 (s, 3F, CF<sub>2</sub>CF<sub>3</sub>), -113.8 (s, 2F, CF<sub>2</sub>CF<sub>3</sub>).

MS (CI):  $m/z$  (%) = 273 [M+1]<sup>+</sup>.

Anal. calcd for C<sub>9</sub>H<sub>9</sub>F<sub>5</sub>N<sub>2</sub>O<sub>2</sub>: C, 39.72; H, 3.33; N, 10.29. Found: C, 39.59; H, 3.61; N, 10.14.

#### ***N*-Methyl-3-(pentafluoroethyl)-1*H*-pyrazole-5-carboxamide (4a)**

The reaction was performed in toluene (4.0 mL) /water (0.2 mL) at 45 °C following the general procedure. The crude product was washed with cyclohexane (0.3 mL) to give the pure compound **4a** as a white solid (30 mg, 78%). M.p. = 172-173 °C.

$^1\text{H}$  NMR (500 MHz;  $\text{CD}_3\text{OD}$ ;  $\text{Me}_4\text{Si}$ ),  $\delta$ : 7.09 (s, 1H, CH), 2.90 (s, 3H, CH<sub>3</sub>).

$^{13}\text{C}$  NMR (125 MHz;  $\text{CD}_3\text{OD}$ ;  $\text{Me}_4\text{Si}$ ),  $\delta$ : 158.9 (s, CO), 144.3 (s, C), 140.8 (broad s, C), signals of CF<sub>2</sub>CF<sub>3</sub> are not seen, 103.4 (s, CH), 24.5 (s, CH<sub>3</sub>).

$^{19}\text{F}$  NMR (375 MHz;  $\text{CD}_3\text{OD}$ ;  $\text{CFCl}_3$ ),  $\delta$ : -85.4 (broad s, 3F, CF<sub>2</sub>CF<sub>3</sub>), -113.3 (broad s, 2F, CF<sub>2</sub>CF<sub>3</sub>).

MS (CI):  $m/z$  (%) = 244 [M+1]<sup>+</sup>.

Anal. calcd for C<sub>7</sub>H<sub>6</sub>F<sub>5</sub>N<sub>3</sub>O: C, 34.58; H, 2.49; N, 17.28. Found: C, 34.25; H, 2.77; N, 17.51.

#### ***N*-(2-bromophenyl)-3-(pentafluoroethyl)-1*H*-pyrazole-5-carboxamide (5a)**

The reaction was performed in in toluene (4.0 mL) /water (0.2 mL) at 45 °C following the general procedure. The crude product was washed with chloroform (0.3 mL) to give the pure compound **5a** as a white solid (54 mg, 78%). M.p. = 152-153 °C.

$^1\text{H}$  NMR (500 MHz;  $\text{DMSO-d}_6$ ;  $\text{Me}_4\text{Si}$ ),  $\delta$ : 14.81 (s, 1H, NH), 10.37 (s, 1H, NH), 7.74 (d,  $^3J(\text{H,H}) = 10.5$  Hz, 1H, Ph), 7.57 (s, 1H, CH), 7.52 (broad s, 1H, Ph), 7.46 (t,  $^3J_{\text{H-H}} = 9.0$  Hz, 1H, Ph), 7.27 (t,  $^3J(\text{H,H}) = 9.0$  Hz, 1H, Ph).

$^{13}\text{C}$  NMR (125 MHz;  $\text{DMSO-d}_6$ ;  $\text{Me}_4\text{Si}$ ),  $\delta$ : 156.7 (s, CO), 139.9 (t,  $^2J_{\text{C-F}} = 31.1$  Hz, CCF<sub>2</sub>), 138.7 (s), signals of CF<sub>2</sub>CF<sub>3</sub> are not seen, 135.2 (s), 133.0 (s), 129.4 (s), 128.8 (s), 128.4 (s), 120.9 (s), 105.5 (s, CH).

$^{19}\text{F}$  NMR (375 MHz;  $\text{DMSO-d}_6$ ;  $\text{CFCl}_3$ ),  $\delta$ : -83.2 (broad s, 3F, CF<sub>2</sub>CF<sub>3</sub>), -110.6 (broad s, 2F, CF<sub>2</sub>CF<sub>3</sub>).

MS (CI):  $m/z$  (%) = 383, 385 [M+1]<sup>+</sup>.

Anal. calcd for C<sub>12</sub>H<sub>7</sub>BrF<sub>5</sub>N<sub>3</sub>O: C, 37.52; H, 1.84; N, 10.94. Found: C, 37.73; H, 2.07; N, 10.58.

#### **Cyclobutyl[3-(pentafluoroethyl)-1*H*-pyrazol-5-yl]methanone (6a)**

Compound **6a** was obtained as a yellow solid (43 mg, 99%) following the general procedure. M.p. = 67-68 °C.

$^1\text{H}$  NMR (500 MHz;  $\text{CDCl}_3$ ;  $\text{Me}_4\text{Si}$ ),  $\delta$ : 11.78 (broad s, 1H, NH), 6.56 (s, 1H, CH), 3.82 (qv,  $J = 7.0$  Hz, 1H, CH), 2.46 (m, 2H), 2.33 (m, 2H), 2.14 (m, 1H), 1.98 (m, 1H).

$^{13}\text{C}$  NMR (125 MHz;  $\text{CDCl}_3$ ;  $\text{Me}_4\text{Si}$ ),  $\delta$ : 191.5 (s, CO), 142.2 ( $^2J_{\text{C-F}} = 31.3$  Hz,  $\text{CCF}_2$ ), 140.4 (broad s, C), 118.3 (qt,  $^1J_{\text{C-F}} = 285.3$  Hz,  $^2J_{\text{C-F}} = 36.3$  Hz,  $\text{CF}_2\text{CF}_3$ ), 109.8 (tq,  $^1J_{\text{C-F}} = 250.0$  Hz,  $^2J_{\text{C-F}} = 38.0$  Hz,  $\text{CF}_2\text{CF}_3$ ), 107.2 (s, CH), 42.5 (s, CH), 24.3 (s,  $\text{CH}_2$ ), 17.8 (s,  $\text{CH}_2$ ).

$^{19}\text{F}$  NMR (375 MHz;  $\text{CDCl}_3$ ;  $\text{CFCl}_3$ ),  $\delta$ : -85.0 (broad s, 3F,  $\text{CF}_2\text{CF}_3$ ), -113.5 (broad s, 2F,  $\text{CF}_2\text{CF}_3$ ).

MS (CI):  $m/z$  (%) = 269  $[\text{M}+1]^+$ .

Anal. calcd for  $\text{C}_{10}\text{H}_9\text{F}_5\text{N}_2\text{O}$ : C, 44.79; H, 3.38; N, 10.45. Found: C, 45.02; H, 3.61; N, 10.16.

### 1-[3-(Pentafluoroethyl)-1H-pyrazol-5-yl]-2-phenylethanone (7a)

Compound **7a** was obtained as a white solid (49 mg, 98%) following the general procedure. M.p. = 75-76 °C.

$^1\text{H}$  NMR (500 MHz;  $\text{CDCl}_3$ ;  $\text{Me}_4\text{Si}$ ),  $\delta$ : 11.67 (broad s, 1H, NH), 7.36-7.26 (m, 5H, Ph), 7.04 (s, 1H, CH), 4.16 (s, 2H,  $\text{CH}_2$ ).

$^{13}\text{C}$  NMR (125 MHz;  $\text{CDCl}_3$ ;  $\text{Me}_4\text{Si}$ ),  $\delta$ : 187.8 (s, CO), 142.0 (t,  $J = 28.7$  Hz,  $\text{CCF}_2$ ), 141.3 (s, C), 132.0 (s, Ph), 129.1 (s, Ph), 128.6 (s, Ph), 127.3 (s, Ph), 118.3 (qt,  $^1J_{\text{C-F}} = 285.0$  Hz,  $^2J_{\text{C-F}} = 36.3$  Hz,  $\text{CF}_2\text{CF}_3$ ), 109.7 (tq,  $^1J_{\text{C-F}} = 250.0$  Hz,  $^2J_{\text{C-F}} = 38.9$  Hz,  $\text{CF}_2\text{CF}_3$ ), 108.9 (s, CH), 46.1 (s,  $\text{CH}_2$ ).

$^{19}\text{F}$  NMR (375 MHz;  $\text{CDCl}_3$ ;  $\text{CFCl}_3$ ),  $\delta$ : -85.0 (t,  $^3J(\text{F,F}) = 3.8$  Hz, 3F,  $\text{CF}_2\text{CF}_3$ ), -113.5 (q,  $^3J(\text{F,F}) = 3.8$  Hz, 2F,  $\text{CF}_2\text{CF}_3$ ).

MS (CI):  $m/z$  (%) = 305  $[\text{M}+1]^+$ .

Anal. calcd for  $\text{C}_{13}\text{H}_9\text{F}_5\text{N}_2\text{O}$ : C, 51.33; H, 2.98; N, 9.21. Found: C, 51.61; H, 3.32; N, 9.07.

### 1-[3-(Pentafluoroethyl)-1H-pyrazol-5-yl]-3-phenyl-1-propanone (8a)

Compound **8a** was obtained as a white solid (49 mg, 97%) following the general procedure. M.p. = 57-58 °C.

$^1\text{H}$  NMR (500 MHz;  $\text{CDCl}_3$ ;  $\text{Me}_4\text{Si}$ ),  $\delta$ : 7.33-7.21 (m, 5H, Ph), 7.04 (s, 1H, CH), 4.16 (s, 2H,  $\text{CH}_2$ ), 3.25 (t,  $J = 7.5$  Hz, 2H,  $\text{CH}_2$ ), 3.09 (t,  $J = 7.5$  Hz, 2H,  $\text{CH}_2$ ).

$^{13}\text{C}$  NMR (125 MHz;  $\text{CDCl}_3$ ;  $\text{Me}_4\text{Si}$ ),  $\delta$ : 189.7 (s, CO), 142.1 (t,  $J = 28.5$  Hz,  $\text{CCF}_2$ ), 141.5 (s, C), 139.6 (s, Ph), 128.3 (s, Ph), 128.0 (s, Ph), 126.2 (s, Ph), 118.2 (qt,  $^1J_{\text{C-F}} = 281.0$  Hz,  $^2J_{\text{C-F}} = 36.3$  Hz,  $\text{CF}_2\text{CF}_3$ ), 109.5 (tq,  $^1J_{\text{C-F}} = 250.0$  Hz,  $^2J_{\text{C-F}} = 38.9$  Hz,  $\text{CF}_2\text{CF}_3$ ), 107.4 (s, CH), 41.0 (s,  $\text{CH}_2$ ), 29.1 (s,  $\text{CH}_2$ ).

$^{19}\text{F}$  NMR (375 MHz;  $\text{CDCl}_3$ ;  $\text{CFCl}_3$ ),  $\delta$ : -85.1 (s, 3F,  $\text{CF}_2\text{CF}_3$ ), -113.6 (s,  $\text{CF}_2\text{CF}_3$ ).

MS (CI):  $m/z$  (%) = 319  $[\text{M}+1]^+$ .

Anal. calcd for  $\text{C}_{13}\text{H}_9\text{F}_5\text{N}_2\text{O}$ : C, 52.84; H, 3.48; N, 8.80. Found: C, 52.51; H, 3.12; N, 8.92.

### 5-(Diphenylphosphoryl)-3-(pentafluoroethyl)-1H-pyrazole (9a)

The synthesis was performed following the general procedure. During the reaction the product partially precipitated from the reaction mixture. After 3 days water (1.0 mL) and  $\text{CH}_2\text{Cl}_2$  (10 mL) were added. Water phase was separated and discarded. The organic suspension was evaporated under vacuum to afford the pure product **9a** as a white solid (59 mg, 95%). M.p. > 200 °C.

$^1\text{H}$  NMR (500 MHz;  $\text{DMSO-d}_6$ ;  $\text{Me}_4\text{Si}$ ),  $\delta$ : 14.81 (broad s, NH), 7.67 (broad s, 6H, Ph+Ph), 7.59 (broad s, 4H, Ph+Ph), 6.82 (s, 1H, CH).

$^{13}\text{C}$  NMR (125 MHz;  $\text{DMSO-d}_6$ ;  $\text{Me}_4\text{Si}$ ),  $\delta$ : 140.0 (broad s, C), the signal NCP is not seen, 132.7 (d,  $^4J(\text{C,P}) = 2.5$  Hz, CH, Ph), 131.4 (d,  $^1J(\text{C,P}) = 97.5$  Hz, C, Ph), 131.2 (d,  $^3J(\text{C,P}) = 11.3$  Hz, CH,

Ph), 128.9 (d,  $^2J_{\text{C,P}} = 12.5$  Hz, CH, Ph), 118.5 (qt,  $^1J_{\text{C-F}} = 285.0$  Hz,  $^2J_{\text{C-F}} = 36.3$  Hz,  $\text{CF}_2\text{CF}_3$ ), 112.0 (d,  $^2J_{\text{C,P}} = 16.3$  Hz, CH), 110.6 (tq,  $^1J_{\text{C-F}} = 250.0$  Hz,  $^2J_{\text{C-F}} = 38.9$  Hz,  $\text{CF}_2\text{CF}_3$ ).

$^{19}\text{F}$  NMR (375 MHz DMSO- $d_6$ ;  $\text{CFCl}_3$ ),  $\delta$ : -83.7 (broad s, 3F,  $\text{CF}_2\text{CF}_3$ ), -110.6 (broad s, 2F,  $\text{CF}_2\text{CF}_3$ ).

$^{31}\text{P}$  NMR (202 MHz DMSO- $d_6$ ;  $\text{H}_3\text{PO}_4$ ),  $\delta$ : 8.8 (broad s, P).

MS (CI):  $m/z$  (%) = 387  $[\text{M}+1]^+$ .

Anal. calcd for  $\text{C}_{17}\text{H}_{12}\text{F}_5\text{N}_2\text{OP}$ : C, 52.86; H, 3.13; N, 7.25. Found: C, 53.02; H, 3.41; N, 7.02.

### 2-[3-(pentafluoroethyl)-1H-pyrazol-5-yl]-1,3-benzothiazole (10a)

The reaction was performed in in toluene (4.0 mL) /water (0.2 mL) at 45 °C following the general procedure. The crude product was crystallized from hexane (0.5 mL) to give the pure compound **10a** as a grey solid (24 mg, 45%). M.p. = 142-143 °C.

$^1\text{H}$  NMR (500 MHz;  $\text{CDCl}_3$ ;  $\text{Me}_4\text{Si}$ ),  $\delta$ : 12.07 (broad s, 1H, NH), 8.11 (d,  $J = 8.0$  Hz, 1H, CH), 7.96 (d,  $J = 8.0$  Hz, 1H, CH), 7.56 (t,  $J = 8.0$  Hz, 1H, CH), 7.48 (t,  $J = 8.0$  Hz, 1H, CH), 7.13 (s, 1H, CH).

$^{13}\text{C}$  NMR (125 MHz;  $\text{CDCl}_3$ ;  $\text{Me}_4\text{Si}$ ),  $\delta$ : 152.7 (s, NCS), 139.0 (broad s, C), 134.2 (s, CH), 126.6 (s, CH), 125.8 (s, CH), 123.1 (s, CH), 121.5 (s, CH),  $\text{C}_2\text{F}_5$  is not seen, 105.4 (s, CH).

$^{19}\text{F}$  NMR (375 MHz;  $\text{CDCl}_3$ ;  $\text{CFCl}_3$ ),  $\delta$ : -84.6 (s, 3F,  $\text{CF}_2\text{CF}_3$ ), -113.4 (s, 2F,  $\text{CF}_2\text{CF}_3$ ).

MS (CI):  $m/z$  (%) = 320  $[\text{M}+1]^+$ .

Anal. calcd for  $\text{C}_{12}\text{H}_6\text{F}_5\text{N}_3\text{S}$ : C, 45.15; H, 1.89; N, 13.16; S, 10.04. Found: C, 45.47; H, 2.01; N, 12.88; S, 9.77.

### 2-[3-(Pentafluoroethyl)-1H-pyrazol-5-yl]-thiazole (11a)

The reaction was performed in dichloromethane/water at 40 °C for 72 h following the general procedure. The crude product was washed with cyclohexane (0.2 mL) to give the pure compound **11a** as a grey solid (24 mg, 57%). M.p. = 127-128 °C.

$^1\text{H}$  NMR (500 MHz; DMSO- $d_6$ ;  $\text{Me}_4\text{Si}$ ),  $\delta$ : 14.77 (broad s, 1H, NH), 8.01 (s, 1H, CH), 7.92 (s, 1H, CH), 7.34 (s, 1H, CH).

$^{13}\text{C}$  NMR (125 MHz; DMSO- $d_6$ ;  $\text{Me}_4\text{Si}$ ),  $\delta$ : 155.2 (broad s, NCS), 143.7 (s, CH), 140.5 (broad s, C), 138.4 (broad s, C), 121.9 (s, CH), 104.4 (s, CH),  $\text{C}_2\text{F}_5$  is not seen.

$^{19}\text{F}$  NMR (375 MHz; DMSO- $d_6$ ;  $\text{CFCl}_3$ ),  $\delta$ : -83.2 (s, 3F,  $\text{CF}_2\text{CF}_3$ ), -110.6 (s, 2F,  $\text{CF}_2\text{CF}_3$ ).

MS (CI):  $m/z$  (%) = 270  $[\text{M}+1]^+$ .

Anal. calcd for  $\text{C}_8\text{H}_4\text{F}_5\text{N}_3\text{S}$ : C, 35.69; H, 1.50; N, 15.61; S, 11.91. Found: C, 35.21; H, 1.38; N, 15.29; S, 12.08.

### 2-[3-((Pentafluoroethyl)-1H-pyrazol-5-yl)- quinoxaline (12a)

The reaction was performed in dichloromethane/water at 40 °C for 72 h following the general procedure. The formed white precipitate was filtered, and dried on air to give the pure product **12a** as a white solid (18 mg, 38%). M.p. > 200 °C.

$^1\text{H}$  NMR (500 MHz; DMSO- $d_6$ ;  $\text{Me}_4\text{Si}$ ),  $\delta$ : 15.10-14.65 (broad s, 1H, NH), 9.56 (s, 1H, CH), 8.14 (d,  $J = 8.0$  Hz, 2H, CH), 7.91 (m, 2H, CH), 7.99 (s, 1H, CH).

$^{13}\text{C}$  NMR (125 MHz; DMSO- $d_6$ ;  $\text{Me}_4\text{Si}$ ),  $\delta$ : 143.7 (s), 142.5 (s), 141.5 (s), 141.1 (s), 131.2 (s), 130.6 (s), 129.2 (s), 128.9 (s), 105.6 (s), two tert-C atoms and  $\text{C}_2\text{F}_5$  are not seen.

$^{19}\text{F}$  NMR (375 MHz; DMSO- $d_6$ ;  $\text{CFCl}_3$ ),  $\delta$ : -83.1 (s, 3F,  $\text{CF}_2\text{CF}_3$ ), -110.5 (s, 2F,  $\text{CF}_2\text{CF}_3$ ).

MS (CI):  $m/z$  (%) = 315  $[\text{M}+1]^+$ .

Anal. calcd for  $\text{C}_{13}\text{H}_7\text{F}_5\text{N}_4$ : C, 49.69; H, 2.25; N, 17.83. Found: C, 49.33; H, 2.53; N, 17.99.

### Dimethyl 3-(pentafluoroethyl)-1H-pyrazole-4,5-dicarboxylate (15a)

Compound **15a** was obtained as a white solid (48 mg, 99%) following the general procedure. M.p. = 59-60 °C.

$^1\text{H}$  NMR (500 MHz;  $\text{CDCl}_3$ ;  $\text{Me}_4\text{Si}$ ),  $\delta$ : 3.97 (s, 3H,  $\text{CH}_3$ ), 3.95 (s, 3H,  $\text{CH}_3$ ).

$^{13}\text{C}$  NMR (125 MHz;  $\text{CDCl}_3$ ;  $\text{Me}_4\text{Si}$ ),  $\delta$ : 162.0 (s, CO), 158.0 (s, CO), 139.9 (t,  $J = 28.7$  Hz,  $\text{CCF}_2$ ), 134.1 (s, C), 118.4 (qt,  $^1J_{\text{C-F}} = 285.0$  Hz,  $^2J_{\text{C-F}} = 36.3$  Hz,  $\text{CF}_2\text{CF}_3$ ), 117.1 (s, C), 110.1 (tq,  $^1J_{\text{C-F}} = 250.0$  Hz,  $^2J_{\text{C-F}} = 38.9$  Hz,  $\text{CF}_2\text{CF}_3$ ), 53.3 (s,  $\text{CH}_3$ ), 53.2 (s,  $\text{CH}_3$ ).

$^{19}\text{F}$  NMR (375 MHz;  $\text{CDCl}_3$ ;  $\text{CFCl}_3$ ),  $\delta$ : -84.3 (t,  $^3J(\text{F,F}) = 3.8$  Hz, 3F,  $\text{CF}_2\text{CF}_3$ ), -112.3 (q,  $^3J(\text{F,F}) = 3.8$  Hz, 2F,  $\text{CF}_2\text{CF}_3$ ).

MS (CI):  $m/z$  (%) = 303  $[\text{M}+1]^+$ .

Anal. calcd for  $\text{C}_9\text{H}_7\text{F}_5\text{N}_2\text{O}_4$ : C, 35.78; H, 2.34; N, 9.27. Found: C, 35.49; H, 2.57; N, 9.10.

### Diethyl 3-(pentafluoroethyl)-1H-pyrazole-4,5-dicarboxylate (16a)

Compound **16a** was obtained as a colorless oil (52 mg, 98%) following the general procedure.

$^1\text{H}$  NMR (500 MHz;  $\text{CDCl}_3$ ;  $\text{Me}_4\text{Si}$ ),  $\delta$ : 12.05 (broad s, 1H, NH), 4.41 (m, 4H,  $\text{CH}_2+\text{CH}_2$ ), 1.37 (m, 6H,  $\text{CH}_3+\text{CH}_3$ ).

$^{13}\text{C}$  NMR (125 MHz;  $\text{CDCl}_3$ ;  $\text{Me}_4\text{Si}$ ),  $\delta$ : 161.2 (s, CO), 157.2 (s, CO), 139.4 (t,  $J = 28.7$  Hz,  $\text{CCF}_2$ ), 133.7 (s, C), 117.9 (qt,  $^1J_{\text{C-F}} = 285.0$  Hz,  $^2J_{\text{C-F}} = 36.3$  Hz,  $\text{CF}_2\text{CF}_3$ ), 117.1 (s, C), 109.9 (tq,  $^1J_{\text{C-F}} = 250.0$  Hz,  $^2J_{\text{C-F}} = 38.9$  Hz,  $\text{CF}_2\text{CF}_3$ ), 62.3 (s,  $\text{OCH}_2$ ), 62.0 (s,  $\text{OCH}_2$ ), 13.5 (s,  $\text{CH}_3$ ), 13.4 (s,  $\text{CH}_3$ ).

$^{19}\text{F}$  NMR (375 MHz;  $\text{CDCl}_3$ ;  $\text{CFCl}_3$ ),  $\delta$ : -84.3 (s, 3F,  $\text{CF}_2\text{CF}_3$ ), -112.2 (s, 2F,  $\text{CF}_2\text{CF}_3$ ).

MS (CI):  $m/z$  (%) = 331  $[\text{M}+1]^+$ .

Anal. calcd for  $\text{C}_{11}\text{H}_{11}\text{F}_5\text{N}_2\text{O}_4$ : C, 40.01; H, 3.26; N, 8.48. Found: C, 39.88; H, 3.59; N, 8.35.

### 3-(Pentafluoroethyl)-4,5-bis(trifluoromethyl)-1H-pyrazole (17a)

A solution of *bis*-trifluoromethylacetylene (**17**) in dry  $\text{CH}_2\text{Cl}_2$  was prepared at -30 °C (Flask 1). An aliquot of a solution of **17** (100 mg, 0.62 mmol) in dry  $\text{CH}_2\text{Cl}_2$  (ca. 5 mL) was added to a previously generated solution (flask 2) of  $\text{C}_2\text{F}_5\text{CHN}_2$  (obtained from  $\text{C}_2\text{F}_5\text{CH}_2\text{NH}_2\cdot\text{HCl}$  (115 mg, 0.62 mmol, 1.0 eq)) in dichloromethane at -10 °C. The reaction mixture was allowed to warm slowly to a room temperature and was left for 12 h. The organic layer was separated, dried over sodium sulfate and gently concentrated under vacuum (20 mm) without external heating to give pyrazole **17a** (129 mg, 0.40 mmol, 65% yield) as a yellowish liquid. *The product is volatile!*

$^{13}\text{C}$  NMR (125 MHz; DMSO- $d_6$ ;  $\text{Me}_4\text{Si}$ ),  $\delta$ : 137.8-136.0 (broad s,  $\text{CF}_3-\text{C}=\text{N}+\text{C}_2\text{F}_5-\text{C}=\text{N}$ ), 119.4 (q,  $^1J_{\text{C-F}} = 267.5$  Hz,  $\text{CF}_3$ ), 118.2 (q,  $^1J_{\text{C-F}} = 268.8$  Hz,  $\text{CF}_3$ ), 117.7 (qt,  $^1J_{\text{C-F}} = 285.0$  Hz,  $^2J_{\text{C-F}} = 36.3$  Hz,  $\text{CF}_2\text{CF}_3$ ), 112.3 (q,  $^2J_{\text{C-F}} = 41.3$  Hz,  $\text{CCF}_3$ ), 109.0 (tq,  $^1J_{\text{C-F}} = 250.0$  Hz,  $^2J_{\text{C-F}} = 38.9$  Hz,  $\text{CF}_2\text{CF}_3$ ).

$^{19}\text{F}$  NMR (375 MHz; DMSO- $d_6$ ;  $\text{CFCl}_3$ ),  $\delta$ : -55.7 (s, 3F,  $\text{CF}_3$ ), -61.4 (s, 3F,  $\text{CF}_3$ ), -84.2 (s, 3F,  $\text{CF}_2\text{CF}_3$ ), -111.7 (s, 2F,  $\text{CF}_2\text{CF}_3$ ).

MS (CI):  $m/z$  (%) = 321  $[\text{M}-1]^+$ .

Anal. calcd for  $\text{C}_7\text{HF}_{11}\text{N}_2$ : C, 26.10; H, 0.31; N, 8.70. Found: C, 26.47; H, 0.65; N, 9.03.

**Ethyl 3-(pentafluoroethyl)-4-(trifluoromethyl)-1H-pyrazole-5-carboxylate (18a),****Ethyl 3-(pentafluoroethyl)-5-(trifluoromethyl)-1H-pyrazole-4-carboxylate (18b)**

Compound **18** was obtained as two inseparable regioisomers (2.6/1) as colorless oil (51 mg, 99%) following the general procedure.

<sup>1</sup>H NMR (500 MHz; CDCl<sub>3</sub>; Me<sub>4</sub>Si), δ: 4.49, 4.39 (2 q, *J* = 7.0 Hz, OCH<sub>2</sub>), 1.43, 1.37 (2 t, *J* = 7.0 Hz, CH<sub>3</sub>).

<sup>13</sup>C NMR (125 MHz; CDCl<sub>3</sub>; Me<sub>4</sub>Si; signals of major isomer **18a**), δ: 156.7 (s, CO) 139.8 (t, *J* = 31.5 Hz, CCF<sub>2</sub>), 134.8 (s, C), 120.0 (q, <sup>1</sup>*J*<sub>C-F</sub> = 267.5 Hz, CF<sub>3</sub>), CF<sub>2</sub>CF<sub>3</sub> and CCF<sub>3</sub> are not seen, 109.9 (tq, <sup>1</sup>*J*<sub>C-F</sub> = 250.0 Hz, <sup>2</sup>*J*<sub>C-F</sub> = 38.9 Hz, CF<sub>2</sub>CF<sub>3</sub>), 62.9 (s, OCH<sub>2</sub>), 13.4 (s, CH<sub>3</sub>).

<sup>19</sup>F NMR (375 MHz; CDCl<sub>3</sub>; CFCl<sub>3</sub>), δ: -55.1, -61.6 (2 s, 3F, CF<sub>3</sub>), -83.1, -83.6 (2 s, 3F, CF<sub>2</sub>CF<sub>3</sub>), -109.5, -111.0 (2 s, 2F, CF<sub>2</sub>CF<sub>3</sub>).

MS (CI): *m/z* (%) = 327 [M+1]<sup>+</sup>.

Anal. calcd for C<sub>9</sub>H<sub>6</sub>F<sub>8</sub>N<sub>2</sub>O<sub>2</sub>: C, 33.14; H, 1.85; N, 8.59. Found: C, 33.45; H, 1.98; N, 8.31.

**1-[3-(Pentafluoroethyl)-5-(trimethylsilyl)-1H-pyrazol-4-yl]ethanone (19b)**

The reaction was performed at 40 °C following the general procedure. The crude product was washed with cold cyclohexane (0.1 mL) to give the pure compound **19b** as a white solid (35 mg, 73%). M.p. = 102-103 °C.

<sup>1</sup>H NMR (500 MHz; CDCl<sub>3</sub>; Me<sub>4</sub>Si), δ: 10.51 (broad s, 1H, NH), 2.56 (s, 3H, CH<sub>3</sub>), 0.38 (s, 9H, Si(CH<sub>3</sub>)<sub>3</sub>).

<sup>13</sup>C NMR (125 MHz; CDCl<sub>3</sub>; Me<sub>4</sub>Si), δ: 193.4 (s, CO), 150.4 (s, C), 139.5 (t, *J* = 28.7 Hz, CCF<sub>2</sub>), 128.8 (s, C), 118.2 (qt, <sup>1</sup>*J*<sub>C-F</sub> = 285.0 Hz, <sup>2</sup>*J*<sub>C-F</sub> = 36.3 Hz, CF<sub>2</sub>CF<sub>3</sub>), 111.1 (tq, <sup>1</sup>*J*<sub>C-F</sub> = 250.0 Hz, <sup>2</sup>*J*<sub>C-F</sub> = 38.9 Hz, CF<sub>2</sub>CF<sub>3</sub>), 29.9 (t, <sup>5</sup>*J*<sub>CF</sub> = 7.5 Hz, CH<sub>3</sub>), -2.3 (s, Si(CH<sub>3</sub>)<sub>3</sub>).

<sup>19</sup>F NMR (375 MHz; CDCl<sub>3</sub>; CFCl<sub>3</sub>), δ: -82.4 (s, 3F, CF<sub>2</sub>CF<sub>3</sub>), -104.9 (s, 2F, CF<sub>2</sub>CF<sub>3</sub>).

MS (CI): *m/z* (%) = 301 [M+1]<sup>+</sup>.

Anal. calcd for C<sub>10</sub>H<sub>13</sub>F<sub>5</sub>N<sub>2</sub>OSi: C, 40.00; H, 4.36; N, 9.33. Found: C, 39.76; H, 4.45; N, 9.61.

**2-Chloro-1-[3-(pentafluoroethyl)-5-(trimethylsilyl)-1H-pyrazol-4-yl]ethanone (20b)**

The reaction was performed at 40 °C following the general procedure. The crude product (a 4/1 mixture of diastereomers **20b/a**) was washed with cold hexane (0.2 mL) to give the pure compound **20b** as a white solid (29 mg, 55%). M.p. = 107-108 °C.

<sup>1</sup>H NMR (500 MHz; CDCl<sub>3</sub>; Me<sub>4</sub>Si), δ: 10.60 (broad s, 1H, NH), 4.68 (s, 2H, CH<sub>2</sub>), 0.40 (s, 9H, Si(CH<sub>3</sub>)<sub>3</sub>).

<sup>13</sup>C NMR (125 MHz; CDCl<sub>3</sub>; Me<sub>4</sub>Si), δ: 187.1 (s, CO), 151.7 (s, C), 139.2 (t, *J* = 31.5 Hz, CCF<sub>2</sub>), 125.6 (s, C), C<sub>2</sub>F<sub>5</sub> is not seen, 48.3 (t, <sup>5</sup>*J*<sub>CF</sub> = 7.5 Hz, CH<sub>2</sub>), -2.5 (s, Si(CH<sub>3</sub>)<sub>3</sub>).

<sup>19</sup>F NMR (375 MHz; CDCl<sub>3</sub>; CFCl<sub>3</sub>), δ: -82.4 (s, 3F, CF<sub>2</sub>CF<sub>3</sub>), -105.2 (s, 2F, CF<sub>2</sub>CF<sub>3</sub>).

MS (CI): *m/z* (%) = 336 [M+1]<sup>+</sup>.

Anal. calcd for C<sub>10</sub>H<sub>12</sub>ClF<sub>5</sub>N<sub>2</sub>OSi: C, 35.88; H, 3.61; N, 8.37. Found: C, 36.16; H, 3.33; N, 8.05.

**2,2-Difluoro-1-[3-(pentafluoroethyl)-4-(trimethylsilyl)-1H-pyrazol-5-yl]ethanone (21a),****2,2-Difluoro-1-[3-(pentafluoroethyl)-5-(trimethylsilyl)-1H-pyrazol-4-yl]ethanone (21b)**

Compound **21b/a** was obtained as two inseparable regioisomers (2.6/1) as colorless oil (48 mg, 89%) following the general procedure.

<sup>1</sup>H NMR (500 MHz; CDCl<sub>3</sub>; Me<sub>4</sub>Si), δ: 10.79 (broad s, 1H, NH), 6.56, 6.32 (2 t, <sup>2</sup>J<sub>HF</sub> = 53.6 Hz, 1H, CHF<sub>2</sub>), 0.38, 0.30 (2 s, 9H, Si(CH<sub>3</sub>)<sub>3</sub>).

<sup>13</sup>C NMR (125 MHz; CDCl<sub>3</sub>; Me<sub>4</sub>Si; major isomer **21b**), δ: 185.3 (t, <sup>2</sup>J<sub>C-F</sub> = 26.3 Hz, COCHF<sub>2</sub>), 151.8 (s, C), 139.9 (t, <sup>2</sup>J<sub>C-F</sub> = 31.3 Hz, CCF<sub>2</sub>), 123.2 (s, C), 118.4 (qt, <sup>1</sup>J<sub>C-F</sub> = 285.0 Hz, <sup>2</sup>J<sub>C-F</sub> = 36.3 Hz, CF<sub>2</sub>CF<sub>3</sub>), 110.4 (tq, <sup>1</sup>J<sub>C-F</sub> = 250.0 Hz, <sup>2</sup>J<sub>C-F</sub> = 38.9 Hz, CF<sub>2</sub>CF<sub>3</sub>), 107.4 (tt, <sup>1</sup>J<sub>C-F</sub> = 247.5 Hz, <sup>5</sup>J<sub>C-F</sub> = 7.5 Hz, CHF<sub>2</sub>), -2.6 (s, Si(CH<sub>3</sub>)<sub>3</sub>).

<sup>19</sup>F NMR (375 MHz; CDCl<sub>3</sub>; CFCl<sub>3</sub>), δ: -83.1, -83.8 (s + broad s, 3F, CF<sub>2</sub>CF<sub>3</sub>), -107.2, -108.4 (s + broad s, 2F, CF<sub>2</sub>CF<sub>3</sub>), -127.3, 127.0 (broad s + dt, <sup>2</sup>J<sub>FF</sub> = 52.6 Hz, <sup>6</sup>J<sub>FF</sub> = 7.5 Hz, 2F, CHF<sub>2</sub>),

MS (CI): *m/z* (%) = 337 [M+1]<sup>+</sup>.

Anal. calcd for C<sub>10</sub>H<sub>11</sub>F<sub>7</sub>N<sub>2</sub>OSi: C, 35.72; H, 3.30; N, 8.33. Found: C, 35.45; H, 3.13; N, 8.54.

### 1-[3-(Trifluoromethyl)-5-(trimethylsilyl)-1H-pyrazol-4-yl]-ethanone (**23**)

To a stirred suspension of CF<sub>3</sub>CH<sub>2</sub>NH<sub>2</sub>\*HCl (65 mg, 0.48 mmol, 3.0 eq.) in CH<sub>2</sub>Cl<sub>2</sub> (4.0 mL) / water (0.2 mL), sodium nitrite (54 mg, 0.78 mmol, 5.0 eq.) and alkyne **19** (22 mg, 0.16 mmol, 1.0 eq.) was added. The reaction mixture was vigorously stirred 168 h at RT. Water (1.0 mL) and CH<sub>2</sub>Cl<sub>2</sub> (3 mL) were added. The organic layer was separated. The aqueous layer was washed with CH<sub>2</sub>Cl<sub>2</sub> (2 × 3 mL). The combined organic layers were dried over Na<sub>2</sub>SO<sub>4</sub> and evaporated under vacuum to provide the crude material (*no starting material was left*). The tarry solid was washed with cold cyclohexane (0.1 mL) to give the pure product **23** (30 mg, 0.12 mmol, 75% yield) as a white solid. M.p. = 120-122 °C.

<sup>1</sup>H NMR (500 MHz; CDCl<sub>3</sub>; Me<sub>4</sub>Si), δ: 11.16 (broad s, 1H, NH), 2.57 (s, 3H, CH<sub>3</sub>), 0.39 (s, 9H, Si(CH<sub>3</sub>)<sub>3</sub>).

<sup>13</sup>C NMR (125 MHz; CDCl<sub>3</sub>; Me<sub>4</sub>Si), δ: 192.6 (s, CO), 151.3 (s, C), 141.0 (q, <sup>2</sup>J(C,F) = 36.1 Hz, CCF<sub>3</sub>), 127.1 (s), 120.8 (q, <sup>1</sup>J(C,F) = 270.0 Hz, CF<sub>3</sub>), 29.2 (s, CH<sub>3</sub>), 2.6 (s, Si(CH<sub>3</sub>)<sub>3</sub>).

<sup>19</sup>F NMR (375 MHz; CDCl<sub>3</sub>; CFCl<sub>3</sub>), δ: -58.1 (s, CF<sub>3</sub>).

Anal. calcd for C<sub>9</sub>H<sub>13</sub>F<sub>3</sub>N<sub>2</sub>OSi: C, 43.19; H, 5.24; N, 11.19. Found: C, 43.42; H, 5.53; N, 10.94.

MS (CI): *m/z* (%) = 251 [M+1]<sup>+</sup>.

### 1-[3-(Pentafluoroethyl)-1H-pyrazol-4-yl]-ethanone (**24**)

Compound **19b** (50 mg, 0.17 mmol) was dissolved in methanol (3 mL). Water (0.5 mL), and KHF<sub>2</sub> (5 mg) were added. The reaction mixture was heated at reflux for 10h. After cooling to a room temperature, the methanol was evaporated under vacuum. Water (1 mL) was added and the mixture was extracted with dichloromethane (3×2 mL). The organic fractions were combined, dried over Na<sub>2</sub>SO<sub>4</sub> and evaporated under vacuum to afford pyrazole **24** (17 mg, 0.08 mmol, 46% yield) as a white solid. M.p. = 152-153 °C.

<sup>1</sup>H NMR (500 MHz; DMSO-d<sub>6</sub>; Me<sub>4</sub>Si), δ: 8.75 (s, 1H, CH), 2.44 (s, 3H, CH<sub>3</sub>).

<sup>13</sup>C NMR (125 MHz DMSO-d<sub>6</sub>; Me<sub>4</sub>Si), δ: 190.2 (s, CO), 137.9 (t, *J* = 28.7 Hz, CCF<sub>2</sub>), 136.7 (s), 121.5 (s), 119.1 (qt, <sup>1</sup>J<sub>C-F</sub> = 285.0 Hz, <sup>2</sup>J<sub>C-F</sub> = 36.3 Hz, CF<sub>2</sub>CF<sub>3</sub>), 110.9 (tq, <sup>1</sup>J<sub>C-F</sub> = 250.0 Hz, <sup>2</sup>J<sub>C-F</sub> = 38.9 Hz, CF<sub>2</sub>CF<sub>3</sub>), 29.0 (s, CH<sub>3</sub>).

<sup>19</sup>F NMR (375 MHz; DMSO-d<sub>6</sub>; CFCl<sub>3</sub>), δ: -80.9 (s, 3F, CF<sub>2</sub>CF<sub>3</sub>), -107.4 (s, 2F, CF<sub>2</sub>CF<sub>3</sub>).

MS (CI): *m/z* (%) = 229 [M+1]<sup>+</sup>.

Anal. calcd for C<sub>7</sub>H<sub>5</sub>F<sub>5</sub>N<sub>2</sub>O: C, 36.86; H, 2.21; N, 12.38. Found: C, 36.51; H, 2.44; N, 12.17.

### 3-(Pentafluoroethyl)-1H-pyrazole-5-carboxylic acid (**25**)

To a solution of pyrazole **1a** (93 mg, 0.38 mmol) in MeOH (0.5 mL) was added 1N NaOH (1.6 mL, 1.60 mmol). The reaction mixture was vigorously stirred at room temperature for 20 h. The solvent



was evaporated under vacuum, and water (5 mL) was added. The water phase was washed with CH<sub>2</sub>Cl<sub>2</sub> (2 \* 1mL). Organic layer was discarded. Water phase was acidified with conc. HCl to pH = 1. White precipitate was formed. The suspension was extracted EtOAc (3 \* 5mL). The combined organic layer was dried over sodium sulfate, and evaporated under vacuum to afford the pure acid **25** (71 mg, 0.31 mmol, 81% yield) as a white solid. M.p.= 134-135 °C.

<sup>1</sup>H NMR (500 MHz; DMSO-d<sub>6</sub>; Me<sub>4</sub>Si), δ: 14.78 (s, 1H, NH), 7.20 (s, 1H, CH).

<sup>13</sup>C NMR (125 MHz; DMSO-d<sub>6</sub>; Me<sub>4</sub>Si), δ: 159.6 (s, CO<sub>2</sub>H), 140.2 (t, <sup>2</sup>J(C,F) = 28.8 Hz, CCF<sub>2</sub>), 136.8 (s, C), 118.3 (qt, <sup>1</sup>J<sub>C-F</sub> = 285.0 Hz, <sup>2</sup>J<sub>C-F</sub> = 36.3 Hz, CF<sub>2</sub>CF<sub>3</sub>), 112.4 (tq, <sup>1</sup>J<sub>C-F</sub> = 250.0 Hz, <sup>2</sup>J<sub>C-F</sub> = 38.9 Hz, CF<sub>2</sub>CF<sub>3</sub>), 108.1 (s, CH).

<sup>19</sup>F NMR (375 MHz; DMSO-d<sub>6</sub>; CFCl<sub>3</sub>), δ: -85.2 (s, 3F, CF<sub>2</sub>CF<sub>3</sub>), -113.8 (s, 2F, CF<sub>2</sub>CF<sub>3</sub>).

MS (CI): *m/z* (%) = 231 [M+1]<sup>+</sup>.

Anal. calcd for C<sub>6</sub>H<sub>3</sub>F<sub>5</sub>N<sub>2</sub>O<sub>2</sub>: C, 31.32; H, 1.31; N, 12.17. Found: C, 31.63; H, 1.02; N, 12.48.

#### **1-Methyl-3-(pentafluoroethyl)-1H-pyrazole-5-carboxylic acid, methyl ester (26)**

Pyrazole **1a** (450 mg, 1.8 mmol) was dissolved in dry DMF (5 mL). Dry K<sub>2</sub>CO<sub>3</sub> (472 mg, 3.6 mmol), and MeI (523 mg, 3.6 mmol) were added. The reaction mixture was vigorously stirred at room temperature for 20 h. The reaction mixture was then subjected to column chromatography on silicagel using hexane/EtOAc = 4/1 as an eluent. R<sub>f</sub> = 0.6. Colorless liquid **26** (328 mg, 1.2 mmol, 69% yield).

<sup>1</sup>H NMR (500 MHz; CDCl<sub>3</sub>; Me<sub>4</sub>Si), δ: 7.10 (s, 1H, CH), 4.25 (s, 3H, CH<sub>3</sub>), 3.92 (s, 3H, CH<sub>3</sub>).

<sup>13</sup>C NMR (125 MHz; CDCl<sub>3</sub>; Me<sub>4</sub>Si), δ: 158.9 (s, CO), 139.0 (t, <sup>2</sup>J(C,F) = 28.8 Hz, CCF<sub>2</sub>), 133.5 (s, C), 118.3 (qt, <sup>1</sup>J<sub>C-F</sub> = 285.0 Hz, <sup>2</sup>J<sub>C-F</sub> = 36.3 Hz, CF<sub>2</sub>CF<sub>3</sub>), 108.6 (s, CH), 110.4 (tq, <sup>1</sup>J<sub>C-F</sub> = 250.0 Hz, <sup>2</sup>J<sub>C-F</sub> = 38.9 Hz, CF<sub>2</sub>CF<sub>3</sub>), 52.0 (s, CH<sub>3</sub>), 40.0 (s, CH<sub>3</sub>).

<sup>19</sup>F NMR (375 MHz; CDCl<sub>3</sub>; CFCl<sub>3</sub>), δ: -85.2 (s, 3F, CF<sub>2</sub>CF<sub>3</sub>), -113.8 (s, 2F, CF<sub>2</sub>CF<sub>3</sub>).

MS (CI): *m/z* (%) = 259 [M+1]<sup>+</sup>.

Anal. calcd for C<sub>8</sub>H<sub>7</sub>F<sub>5</sub>N<sub>2</sub>O<sub>2</sub>: C, 37.22; H, 2.73; N, 10.85. Found: C, 37.48; H, 2.91; N, 10.56.

#### **1-Methyl-3-(pentafluoroethyl)-1H-pyrazole-5-carboxylic acid (27)**

To a solution of pyrazole **26** (100 mg, 0.38 mmol) in MeOH (0.5 mL) was added 1N NaOH (0.8 mL, 0.80 mmol). The reaction mixture was vigorously stirred at room temperature for 20 h. The solvent was evaporated under vacuum, and water (5 mL) was added. The water phase was washed with CH<sub>2</sub>Cl<sub>2</sub> (2 \* 1mL). Organic layer was discarded. Water phase was acidified with conc. HCl to pH = 1. White precipitate was formed. The suspension was extracted CH<sub>2</sub>Cl<sub>2</sub> (3 \* 5mL). The combined organic layer was dried over sodium sulfate, and evaporated under vacuum to afford the pure acid **27** (92 mg, 0.37 mmol, 97% yield) as a white solid. M.p.= 125-126 °C.

<sup>1</sup>H NMR (500 MHz; CDCl<sub>3</sub>; Me<sub>4</sub>Si), δ: 7.25 (s, 1H, CH), 4.28 (s, 3H, CH<sub>3</sub>).

<sup>13</sup>C NMR (125 MHz; CDCl<sub>3</sub>; Me<sub>4</sub>Si), δ: 162.4 (s, CO), 139.4 (t, <sup>2</sup>J(C,F) = 28.5 Hz, CCF<sub>2</sub>), 132.8 (s, C), 118.2 (qt, <sup>1</sup>J<sub>C-F</sub> = 285.0 Hz, <sup>2</sup>J<sub>C-F</sub> = 36.5 Hz, CF<sub>2</sub>CF<sub>3</sub>), 109.8 (tq, <sup>1</sup>J<sub>C-F</sub> = 250.0 Hz, <sup>2</sup>J<sub>C-F</sub> = 38.9 Hz, CF<sub>2</sub>CF<sub>3</sub>), 112.0 (s, CH), 40.0 (s, CH<sub>3</sub>).

<sup>19</sup>F NMR (375 MHz; CDCl<sub>3</sub>; CFCl<sub>3</sub>), δ: -85.1 (s, 3F, CF<sub>2</sub>CF<sub>3</sub>), -113.8 (s, 2F, CF<sub>2</sub>CF<sub>3</sub>).

MS (CI): *m/z* (%) = 243 [M-1]<sup>+</sup>.

Anal. calcd for C<sub>7</sub>H<sub>5</sub>F<sub>5</sub>N<sub>2</sub>O<sub>2</sub>: C, 34.44; H, 2.06; N, 11.48. Found: C, 34.17; H, 1.91; N, 11.37.

# Compound 1a

## Copies of NMR spectra.

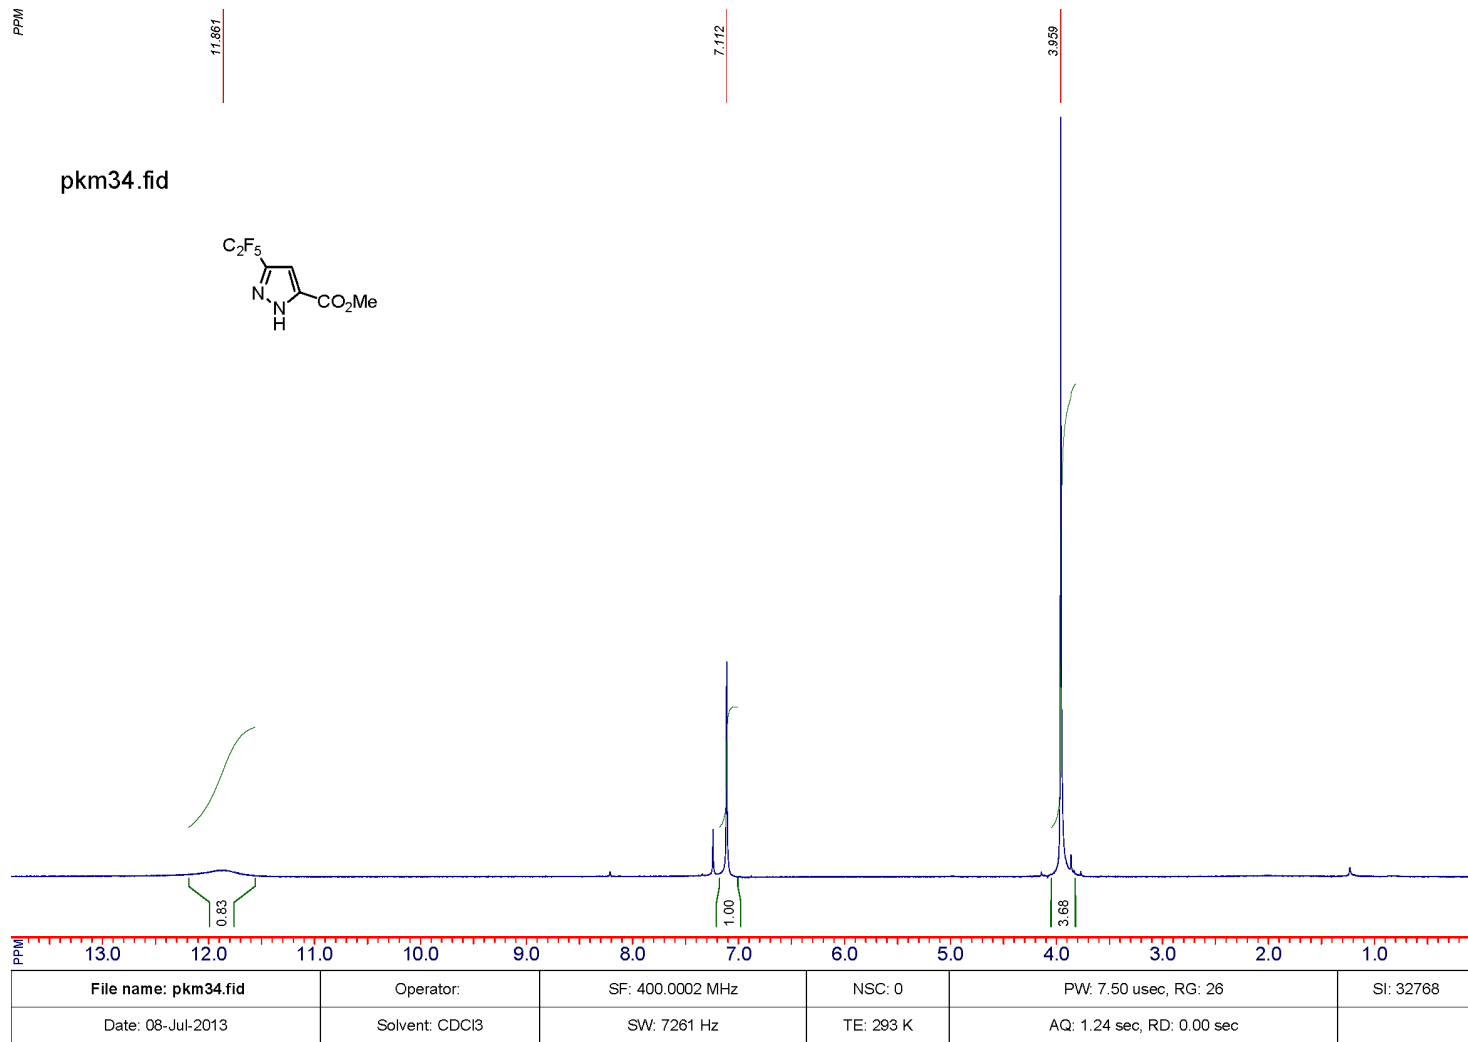

PPM

pkm34\_C13

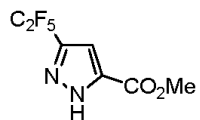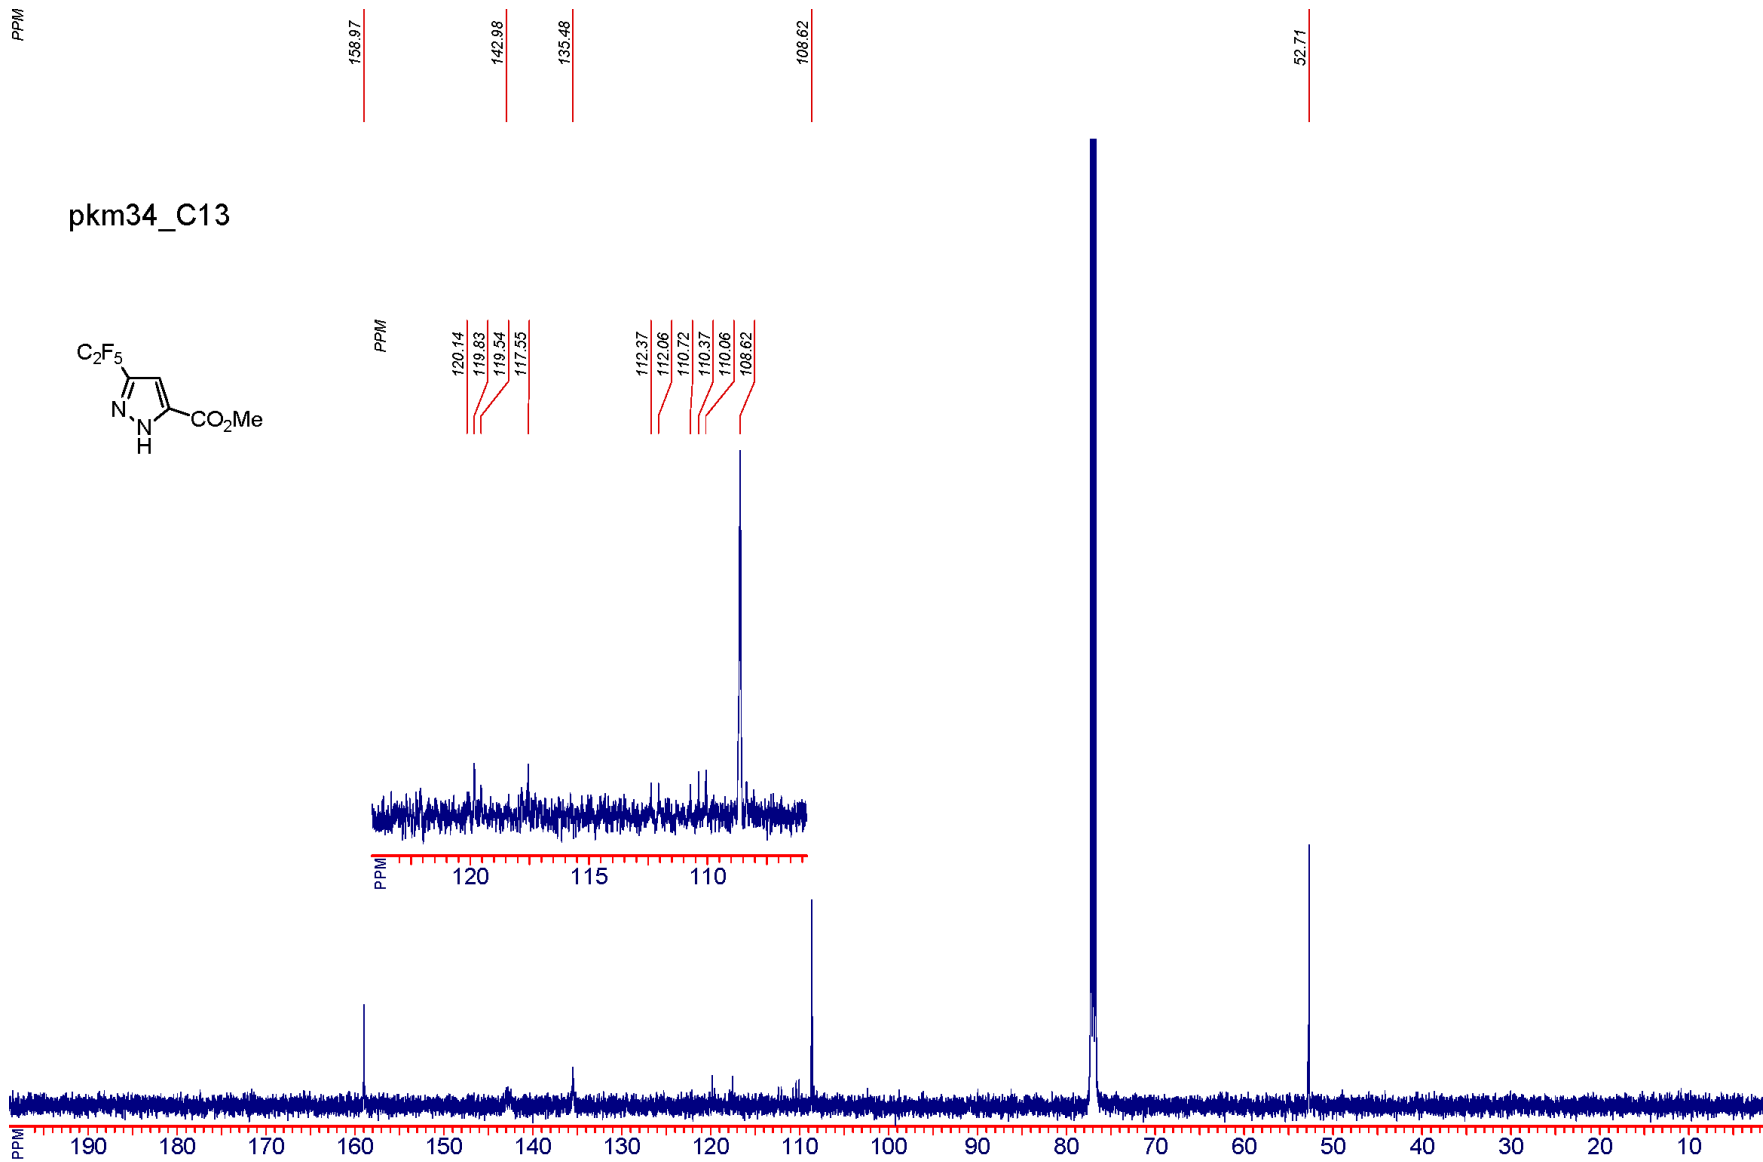

|                      |                |                  |           |                            |                                     |
|----------------------|----------------|------------------|-----------|----------------------------|-------------------------------------|
| File name: pkm34_C13 | Operator: root | SF: 125.7422 MHz | NSC: 1125 | PW: 0.00 usec, RG: 51200   | SI: 65536                           |
| Date: 10-Jul-2013    | Solvent: dms0  | SW: 32680 Hz     | TE: 0 K   | AQ: 1.57 sec, RD: 0.00 sec | Parameter file, XWIN-NMRVersion 3.5 |

PPM

pkm34\_F19.fid

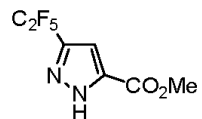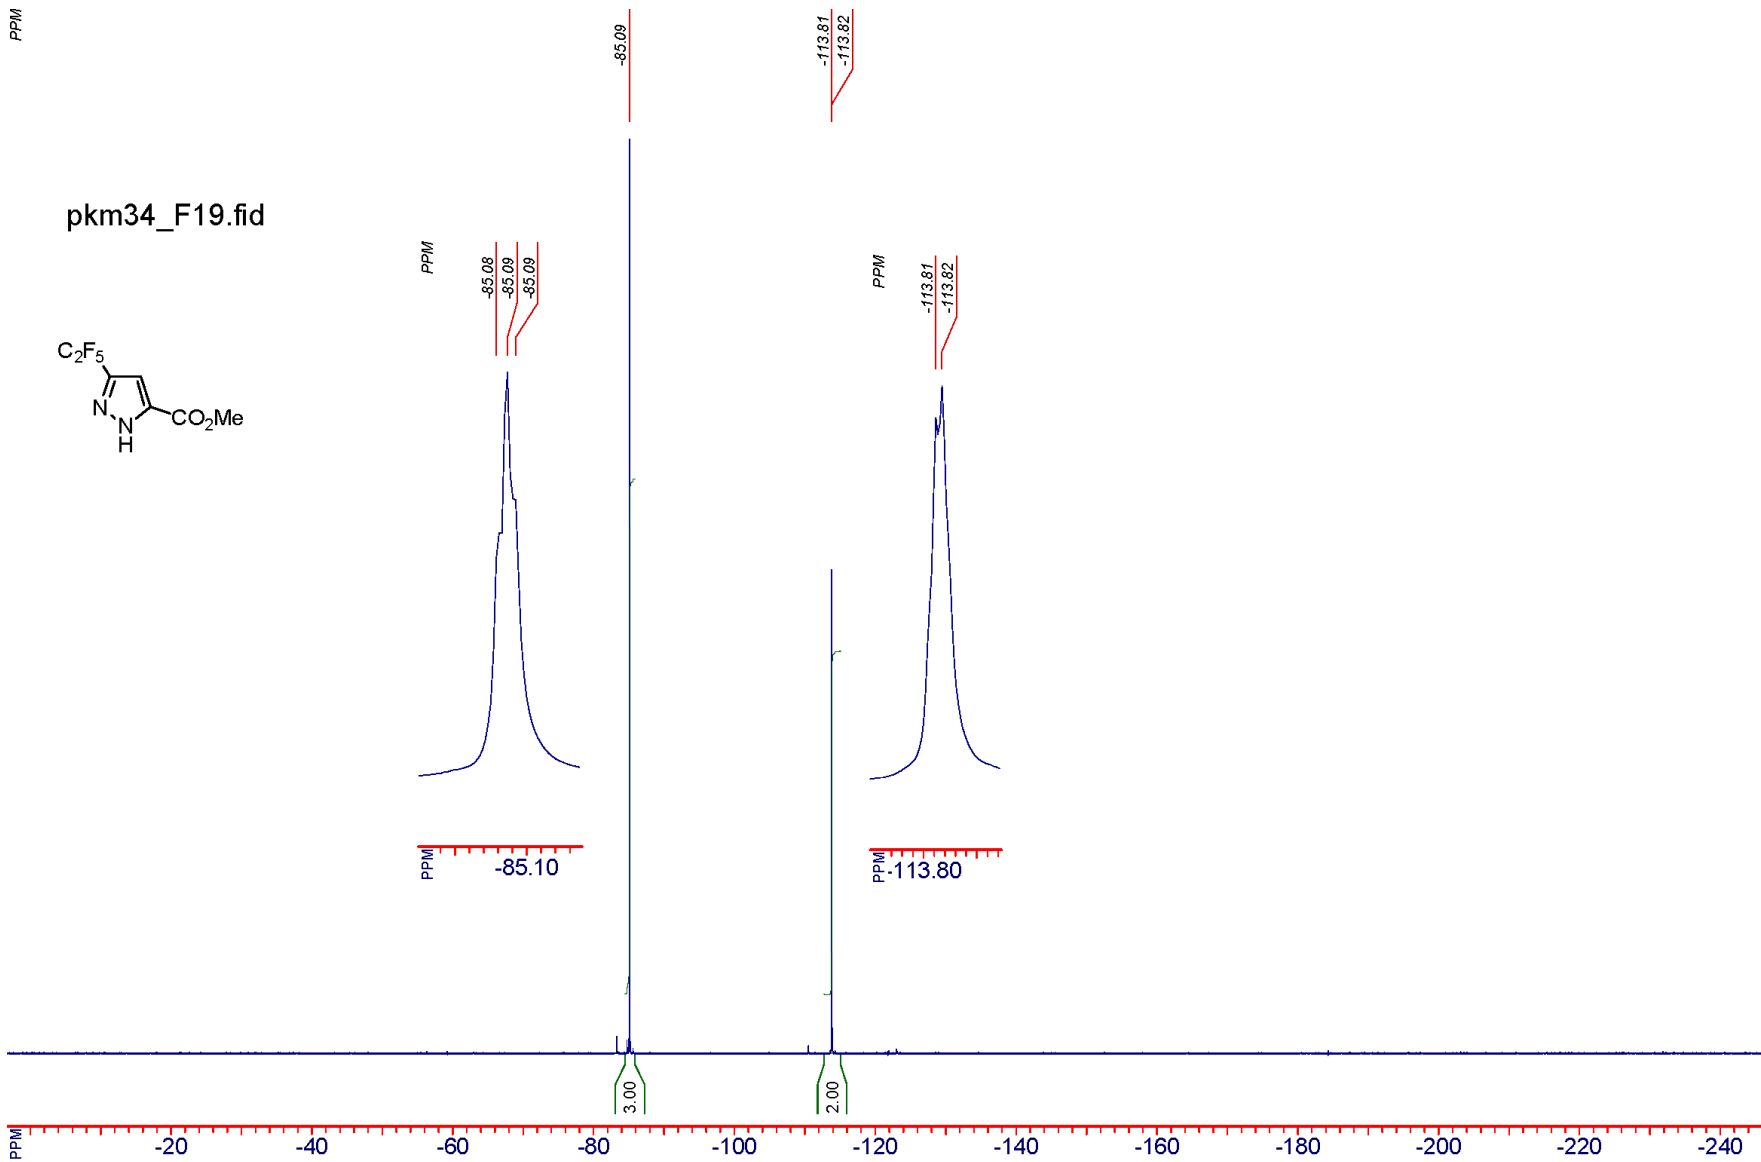

|                          |                |                  |           |                            |            |
|--------------------------|----------------|------------------|-----------|----------------------------|------------|
| File name: pkm34_F19.fid | Operator:      | SF: 376.3189 MHz | NSC: 0    | PW: 3.00 usec, RG: 16      | SI: 131072 |
| Date: 11-Jul-2013        | Solvent: cdcl3 | SW: 94118 Hz     | TE: 293 K | AQ: 0.68 sec, RD: 0.00 sec |            |

# Compound 2a

PPM

11.884

7.131

4.466  
4.452  
4.438  
4.424

1.431  
1.417  
1.402

## pkm91

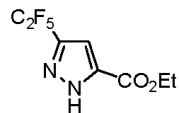

PPM  
4.466  
4.452  
4.438  
4.424

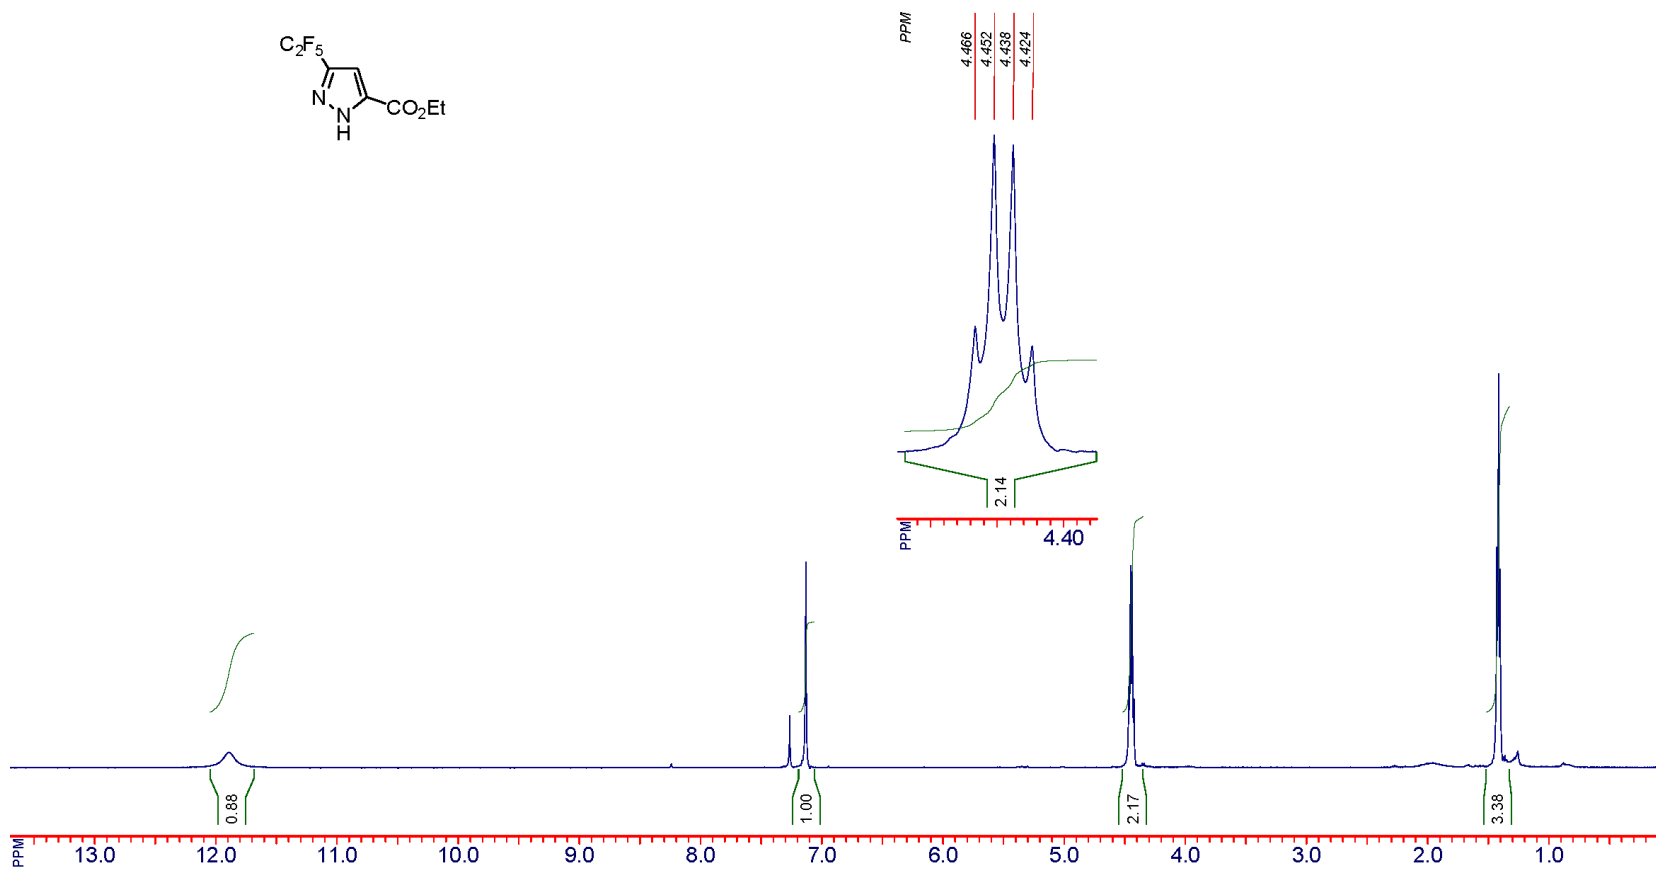

|                   |                |                  |         |                            |                                     |
|-------------------|----------------|------------------|---------|----------------------------|-------------------------------------|
| File name: pkm91  | Operator: root | SF: 499.9500 MHz | NSC: 1  | PW: 0.00 usec, RG: 24      | SI: 32768                           |
| Date: 21-Oct-2013 | Solvent: CDCl3 | SW: 8993 Hz      | TE: 0 K | AQ: 1.82 sec, RD: 0.00 sec | Parameter file, XWIN-NMRVersion 3.5 |

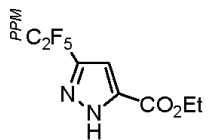

PKM-91\_C13

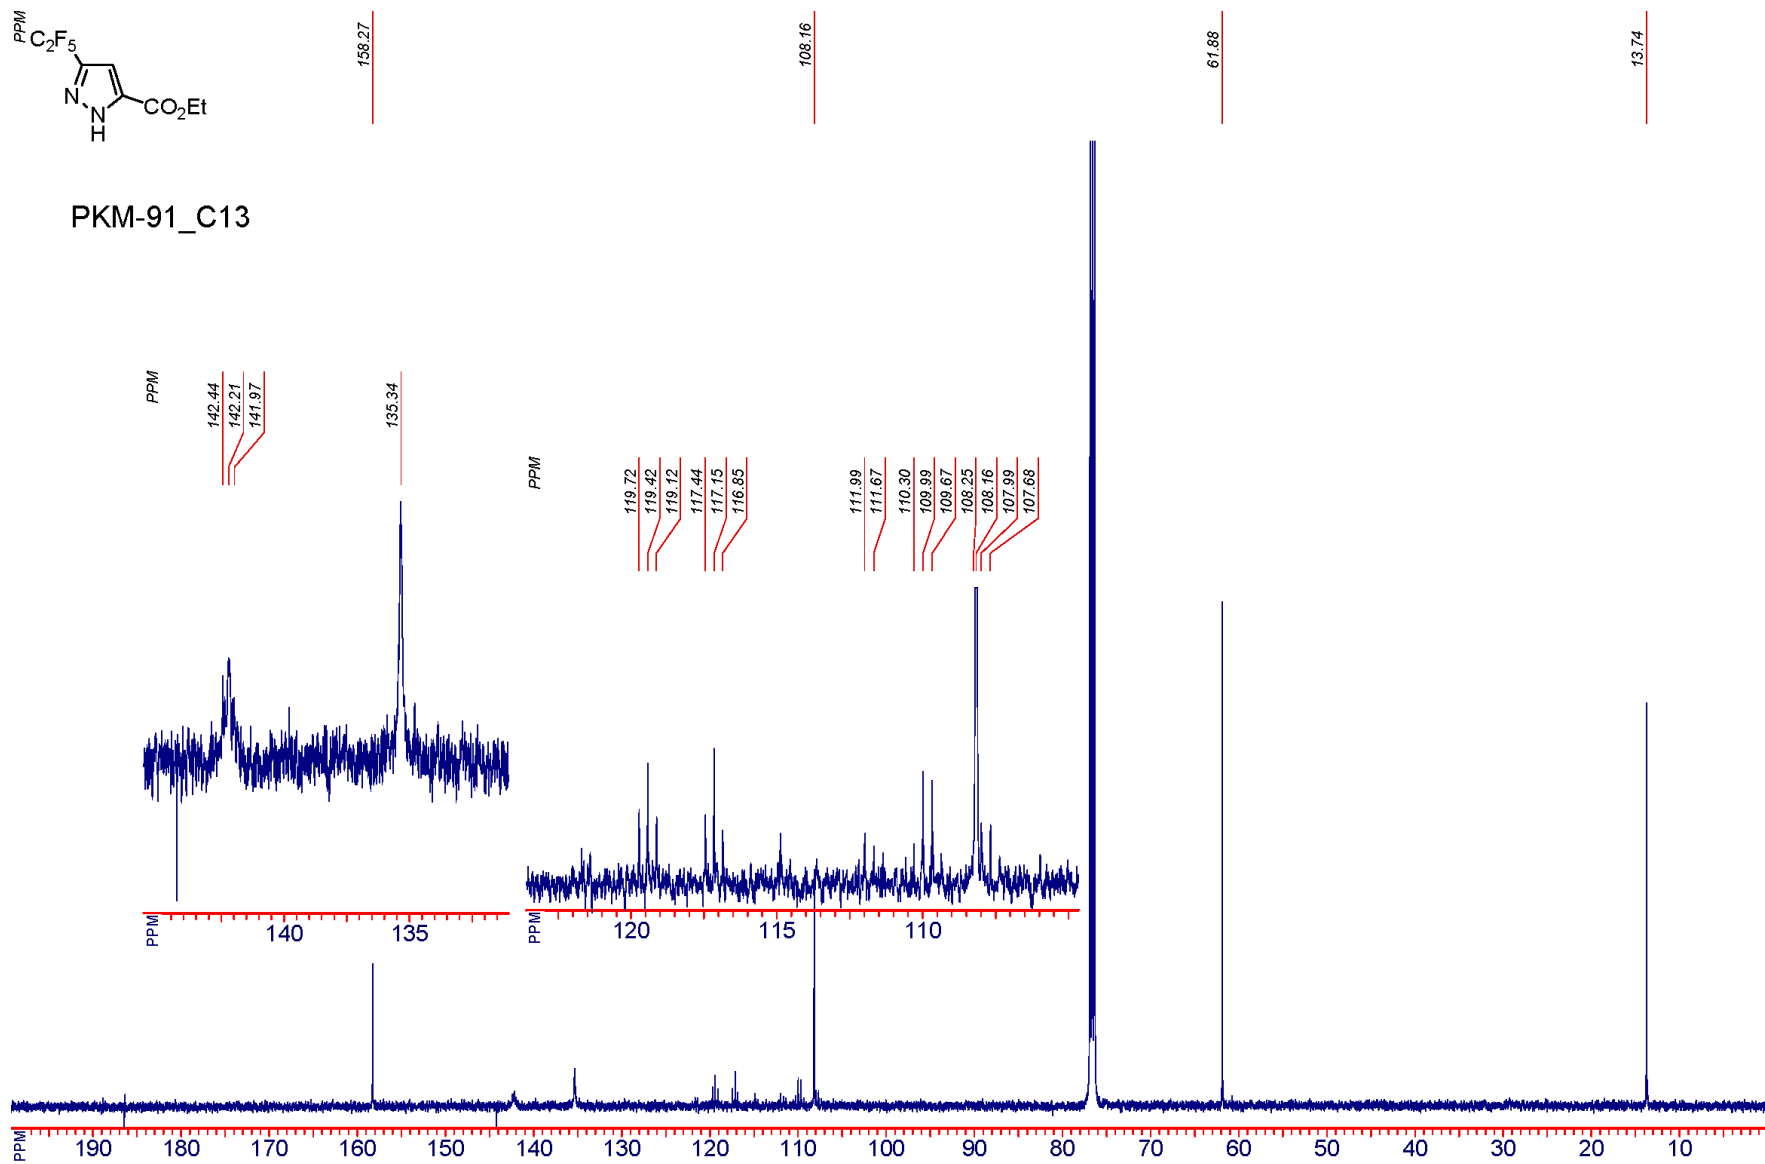

|                       |                |                  |           |                            |                                     |
|-----------------------|----------------|------------------|-----------|----------------------------|-------------------------------------|
| File name: PKM-91_C13 | Operator: root | SF: 125.7126 MHz | NSC: 2651 | PW: 0.00 usec, RG: 51200   | SI: 65536                           |
| Date: 22-Oct-2013     | Solvent: DMSO  | SW: 32680 Hz     | TE: 0 K   | AQ: 1.57 sec, RD: 0.00 sec | Parameter file, XWIN-NMRVersion 3.5 |

PPM

pkm-91\_F19.fid

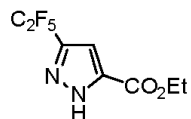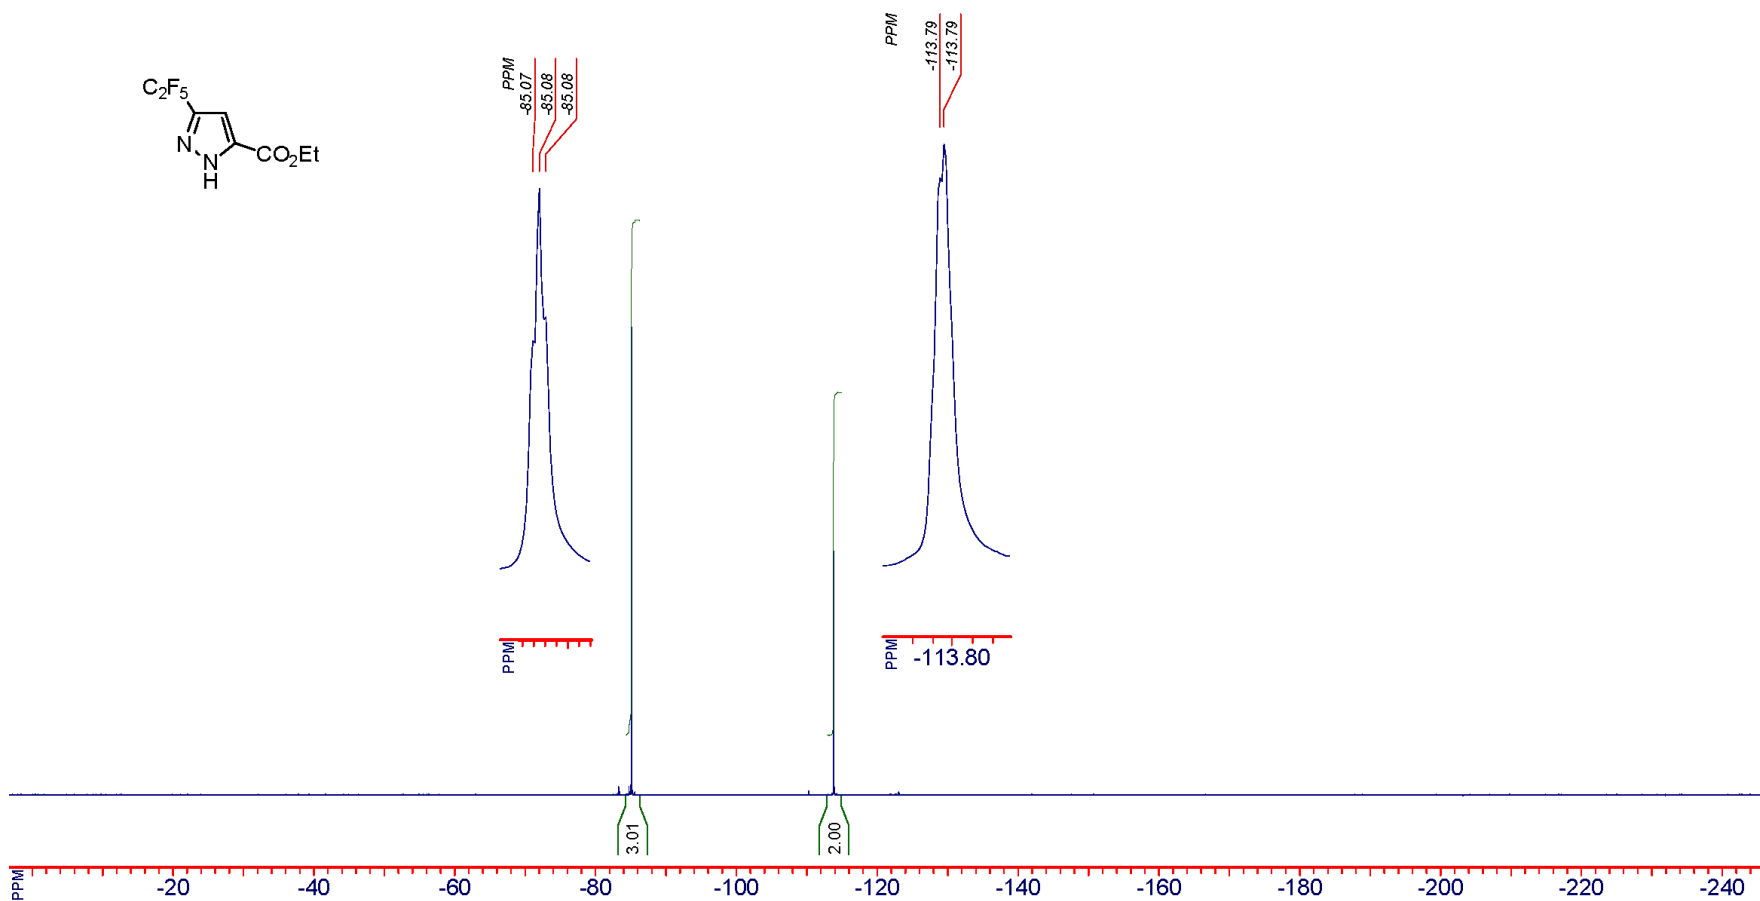

|                           |                |                  |           |                            |            |
|---------------------------|----------------|------------------|-----------|----------------------------|------------|
| File name: pkm-91_F19.fid | Operator:      | SF: 376.3189 MHz | NSC: 0    | PW: 3.00 usec, RG: 16      | SI: 131072 |
| Date: 24-Oct-2013         | Solvent: cdcl3 | SW: 94118 Hz     | TE: 293 K | AQ: 0.68 sec, RD: 0.00 sec |            |

# Compound 3a

PPM

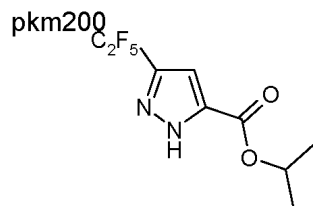

7.115

1.393  
1.361

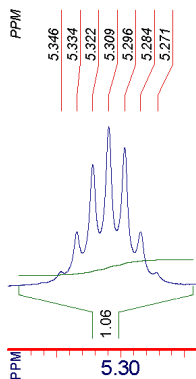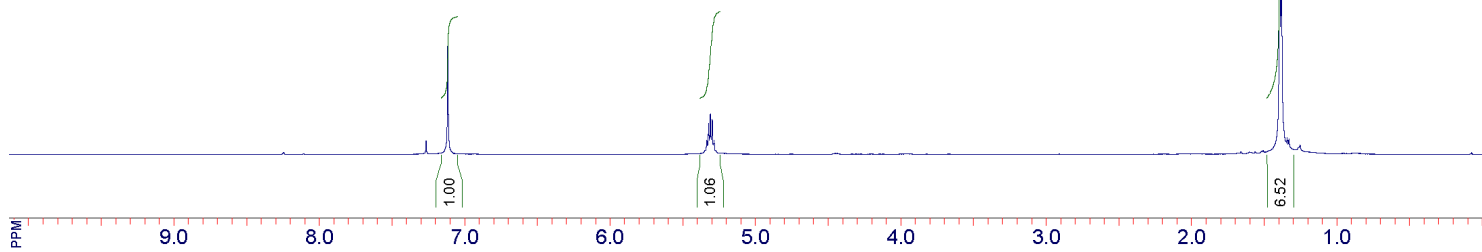

|                   |                |                  |         |                            |                                      |
|-------------------|----------------|------------------|---------|----------------------------|--------------------------------------|
| File name: pkm200 | Operator: root | SF: 499.9500 MHz | NSC: 1  | PW: 0.00 usec, RG: 200     | SI: 32768                            |
| Date: 12-May-2014 | Solvent: CDCl3 | SW: 8993 Hz      | TE: 0 K | AQ: 1.82 sec, RD: 0.00 sec | Parameter file, XWIN-NMR Version 3.5 |



PPM

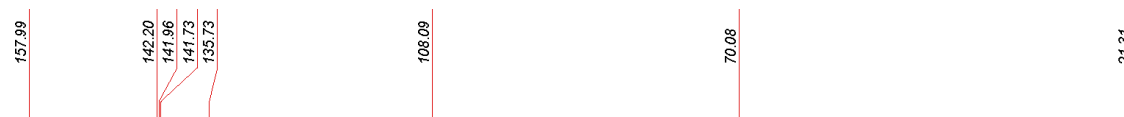

pkm200\_C13

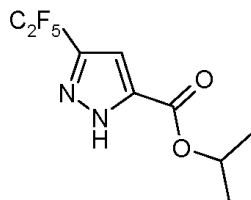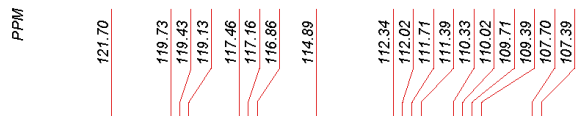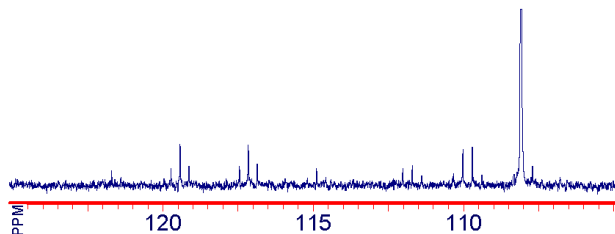

|                       |                |                  |           |                            |                                      |
|-----------------------|----------------|------------------|-----------|----------------------------|--------------------------------------|
| File name: pkm200_C13 | Operator: root | SF: 125.7126 MHz | NSC: 1619 | PW: 0.00 usec, RG: 51200   | SI: 65536                            |
| Date: 14-May-2014     | Solvent: CDCl3 | SW: 32680 Hz     | TE: 0 K   | AQ: 1.57 sec, RD: 0.00 sec | Parameter file, XWMN-NMR Version 3.5 |

PPM

-65.14

-113.80

Pkm200\_F19.fid

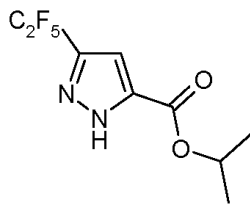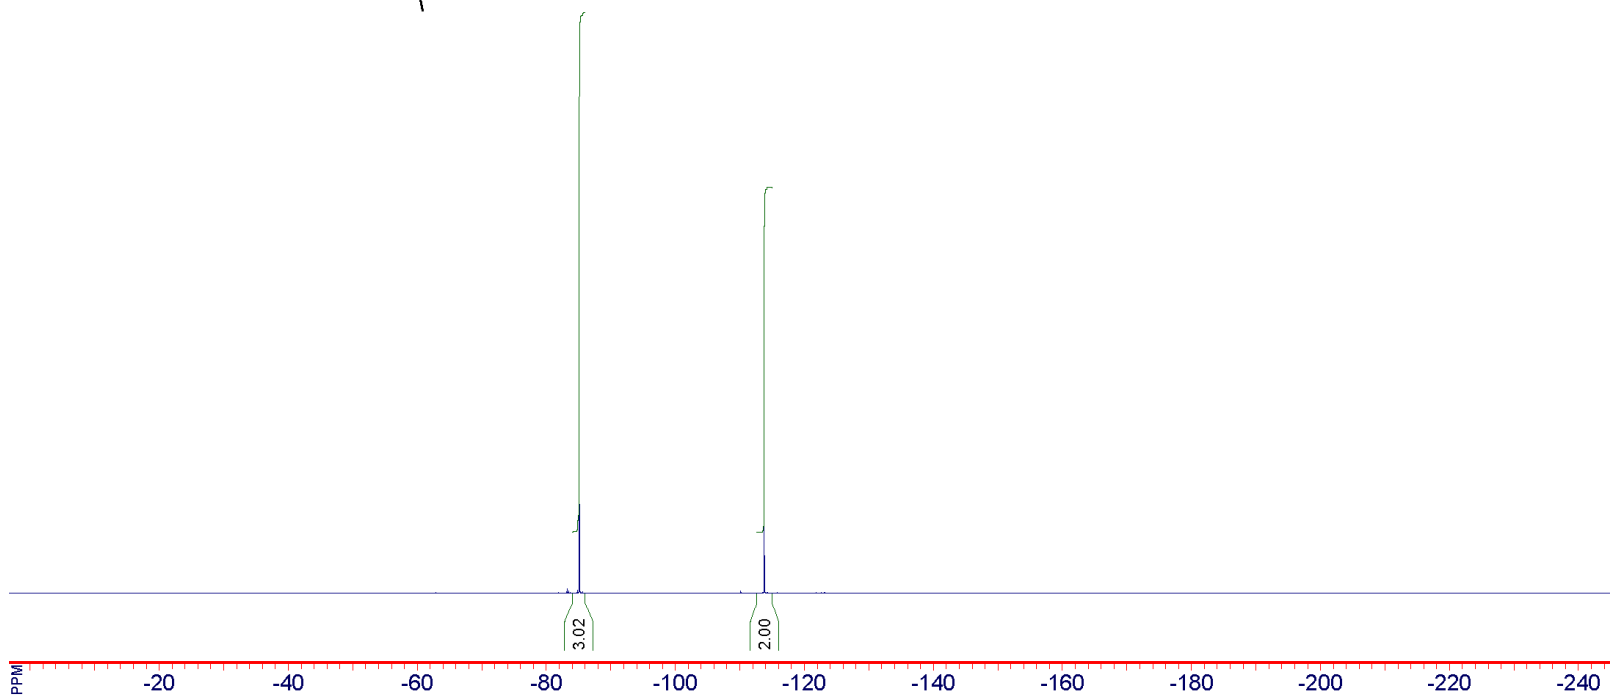

|                           |                |                  |           |                            |           |
|---------------------------|----------------|------------------|-----------|----------------------------|-----------|
| File name: Pkm200_F19.fid | Operator:      | SF: 376.3189 MHz | NSC: 0    | PW: 3.00 usec, RG: 32      | SI: 65536 |
| Date: 20-May-2014         | Solvent: cdcl3 | SW: 94118 Hz     | TE: 293 K | AQ: 0.34 sec, RD: 0.00 sec | □         |

# Compound 4a

PPM

pkm-106

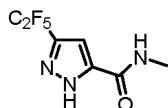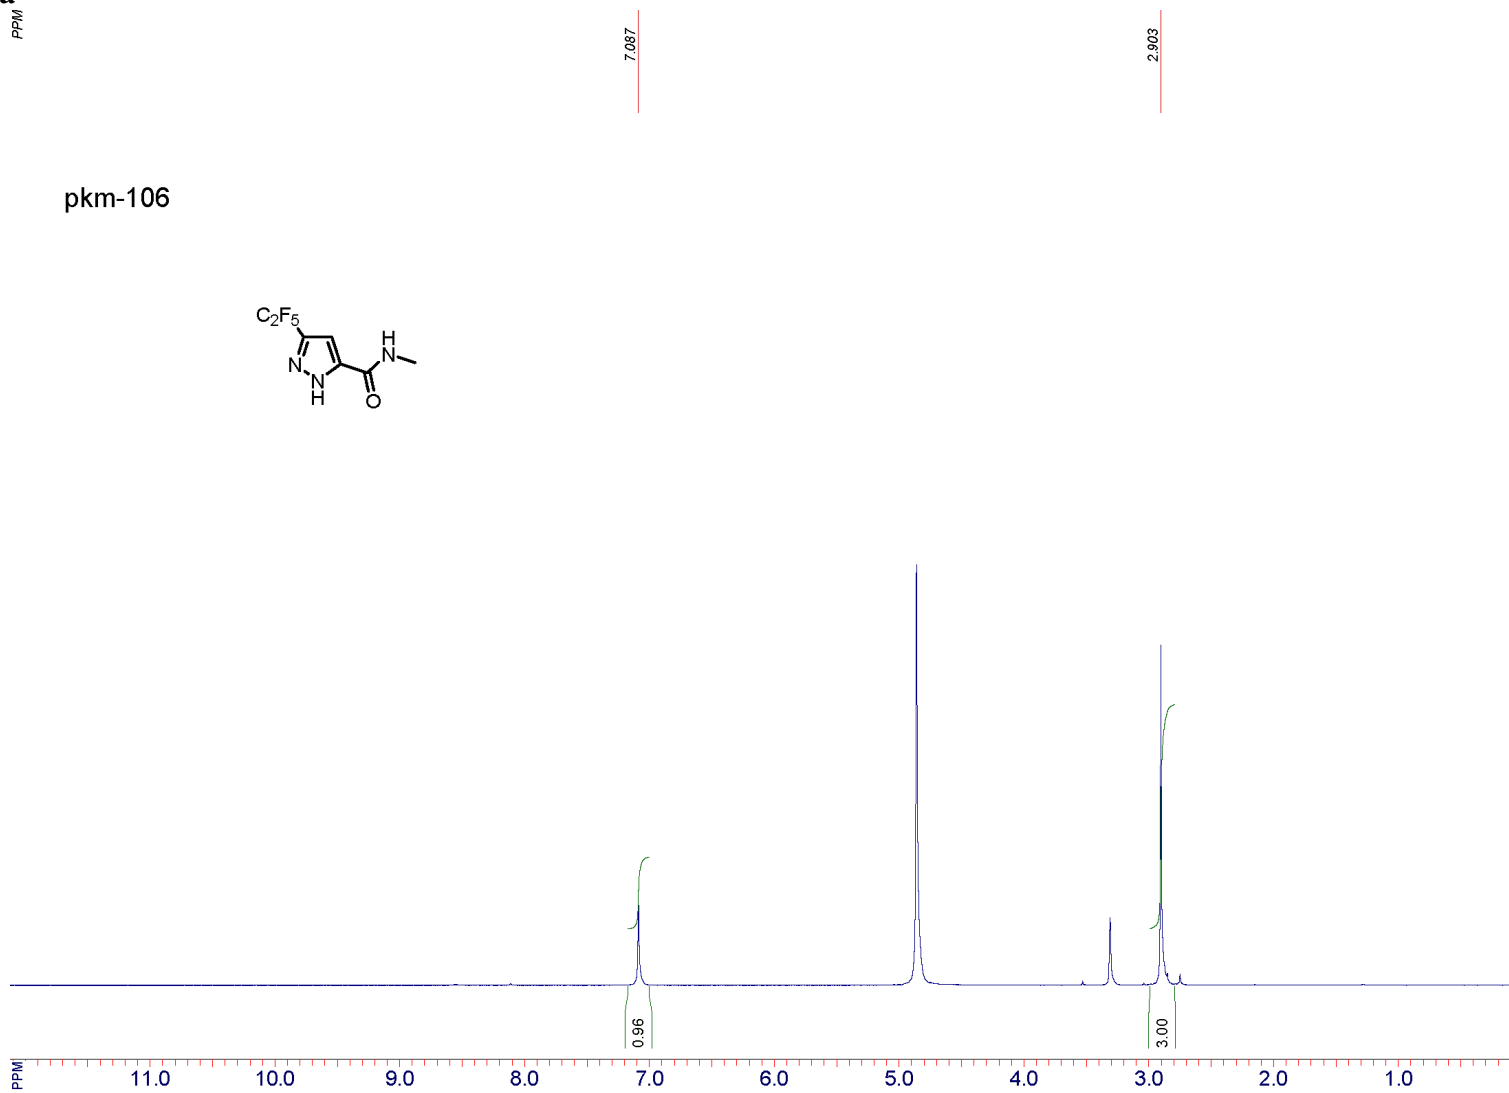

|                    |                |                  |         |                            |                                      |
|--------------------|----------------|------------------|---------|----------------------------|--------------------------------------|
| File name: pkm-106 | Operator: root | SF: 499.9500 MHz | NSC: 1  | PW: 0.00 usec, RG: 32      | SI: 32768                            |
| Date: 06-Nov-2013  | Solvent: MeOD  | SW: 8993 Hz      | TE: 0 K | AQ: 1.82 sec, RD: 0.00 sec | Parameter file, XWMN-NMR Version 3.5 |

PPM

pkm-106 C13

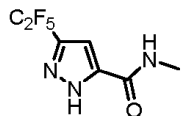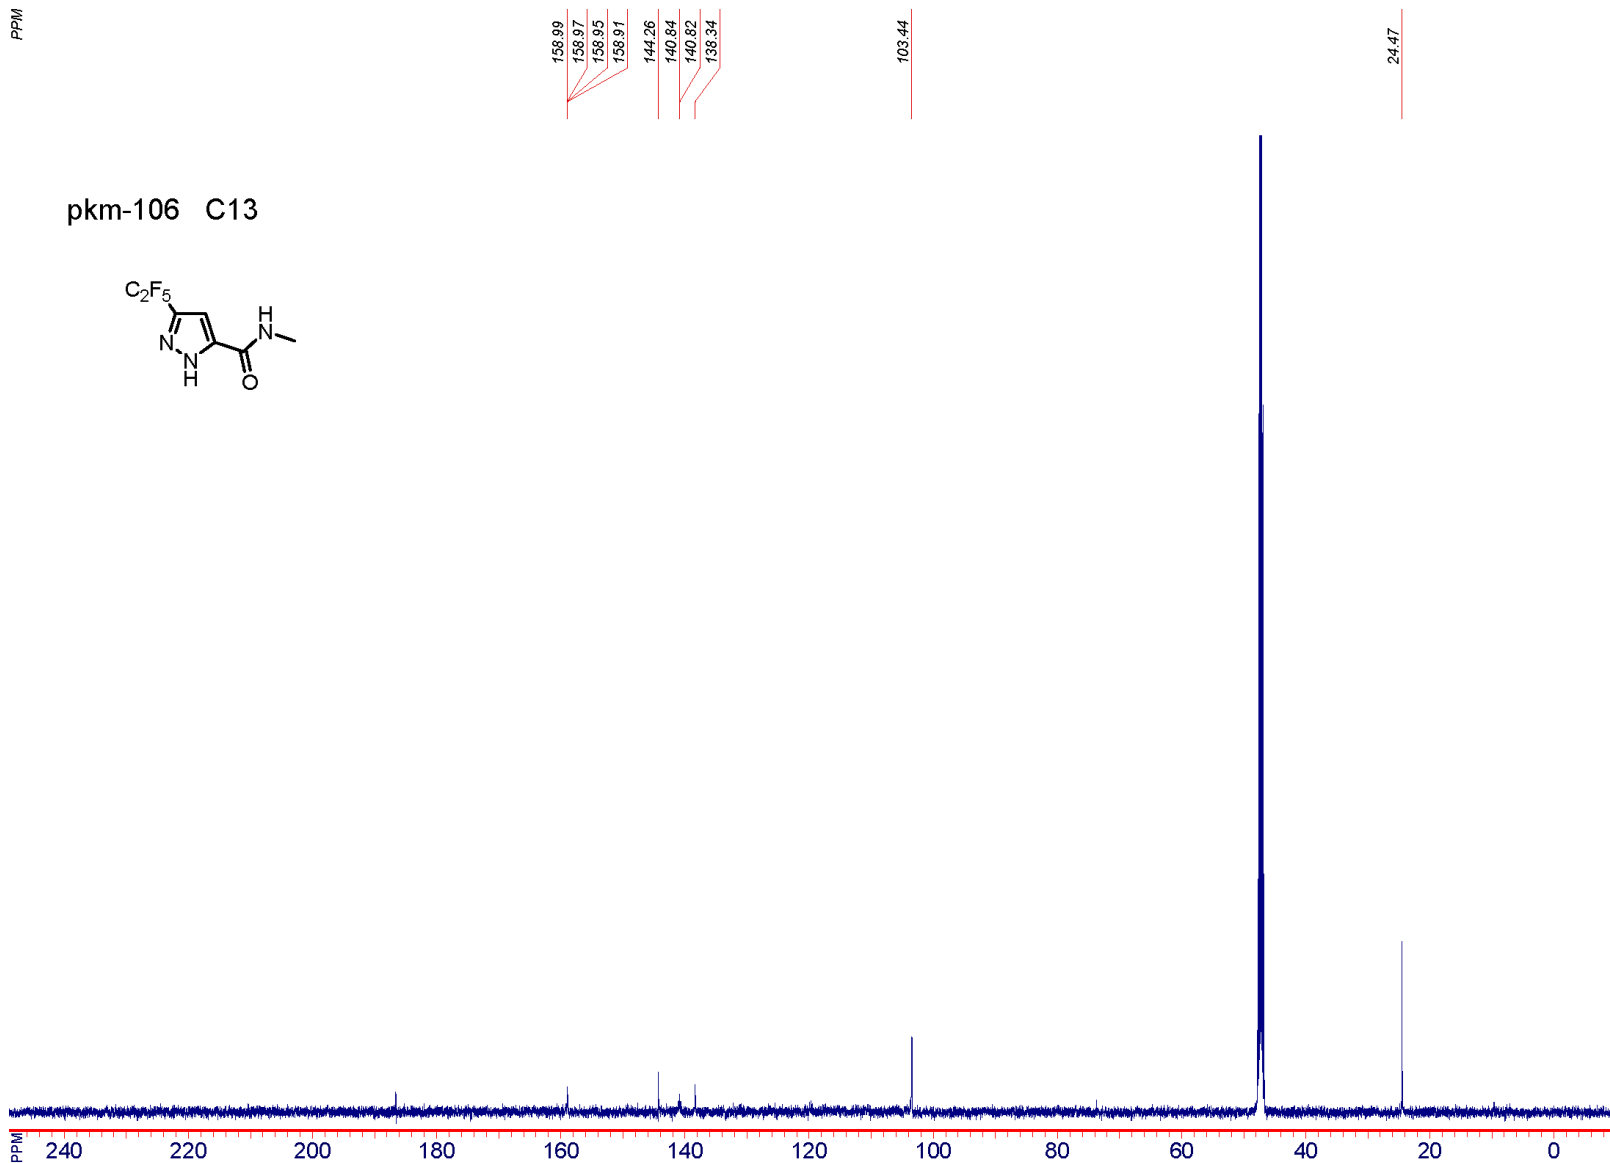

|                        |                |                  |           |                            |                                      |
|------------------------|----------------|------------------|-----------|----------------------------|--------------------------------------|
| File name: pkm-106 C13 | Operator: root | SF: 125.7126 MHz | NSC: 9466 | PW: 0.00 usec, RG: 51200   | SI: 65536                            |
| Date: 08-Nov-2013      | Solvent: MeOD  | SW: 32680 Hz     | TE: 0 K   | AQ: 1.57 sec, RD: 0.00 sec | Parameter file, XWIN-NMR Version 3.5 |

PPM

-85.33  
-85.36  
-85.39  
-85.41

-113.15  
-113.18  
-113.20  
-113.22

pkm106\_F19.fid

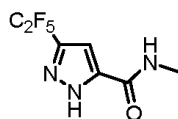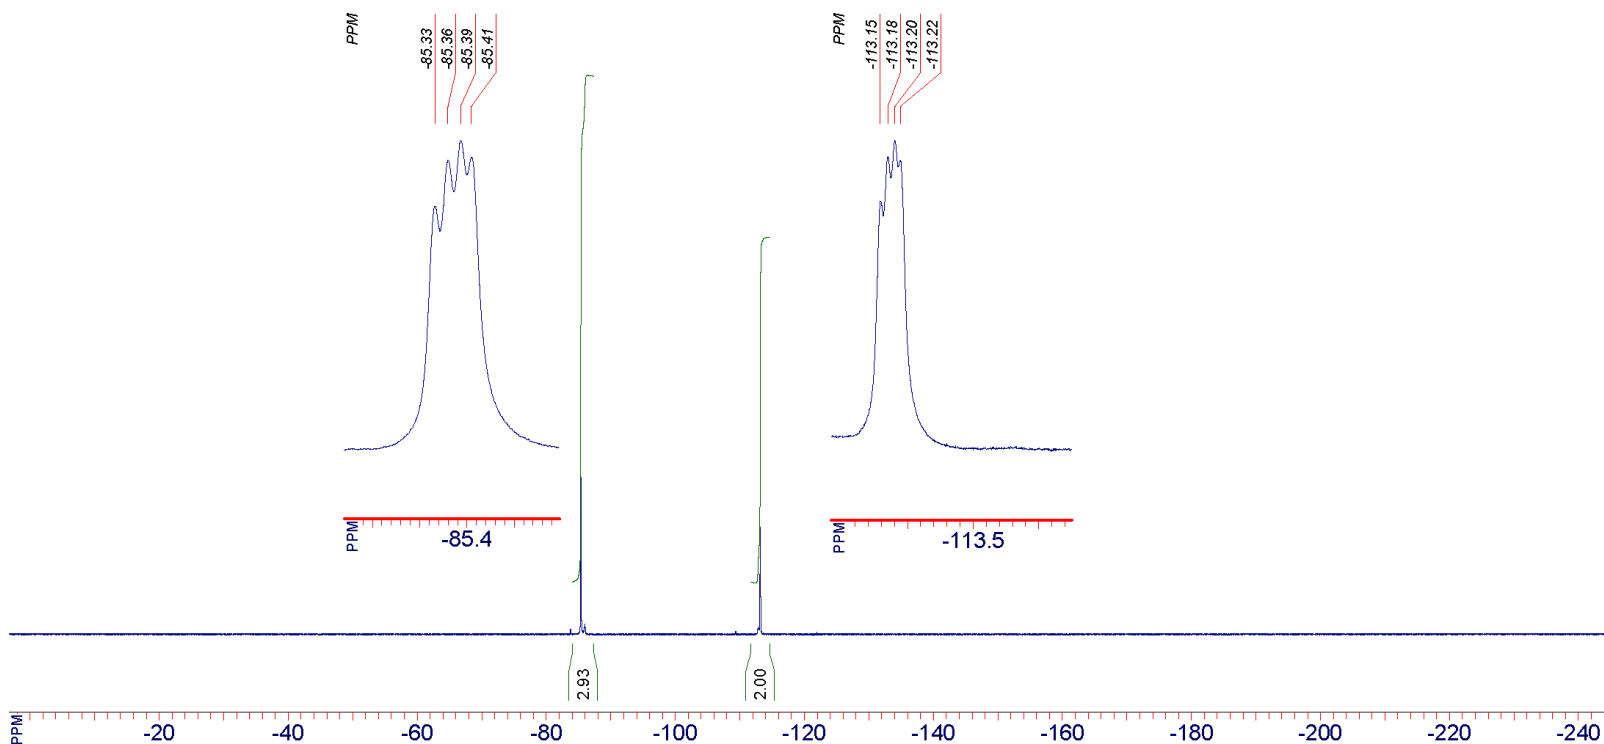

|                           |                |                  |           |                            |            |
|---------------------------|----------------|------------------|-----------|----------------------------|------------|
| File name: pkm106_F19.fid | Operator:      | SF: 376.3189 MHz | NSC: 0    | PW: 3.00 usec, RG: 16      | SI: 131072 |
| Date: 12-Nov-2013         | Solvent: cdcl3 | SW: 94118 Hz     | TE: 293 K | AQ: 0.68 sec, RD: 0.00 sec | □          |

# Compound 5a

PPM

14.807

10.371

pkm153.fid

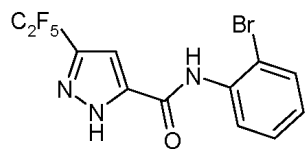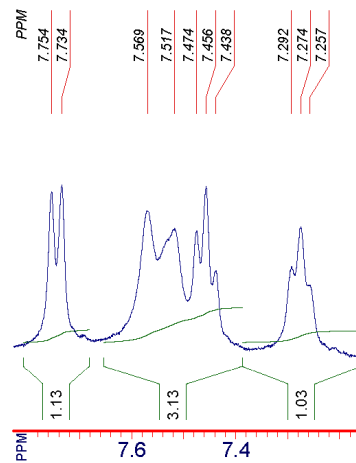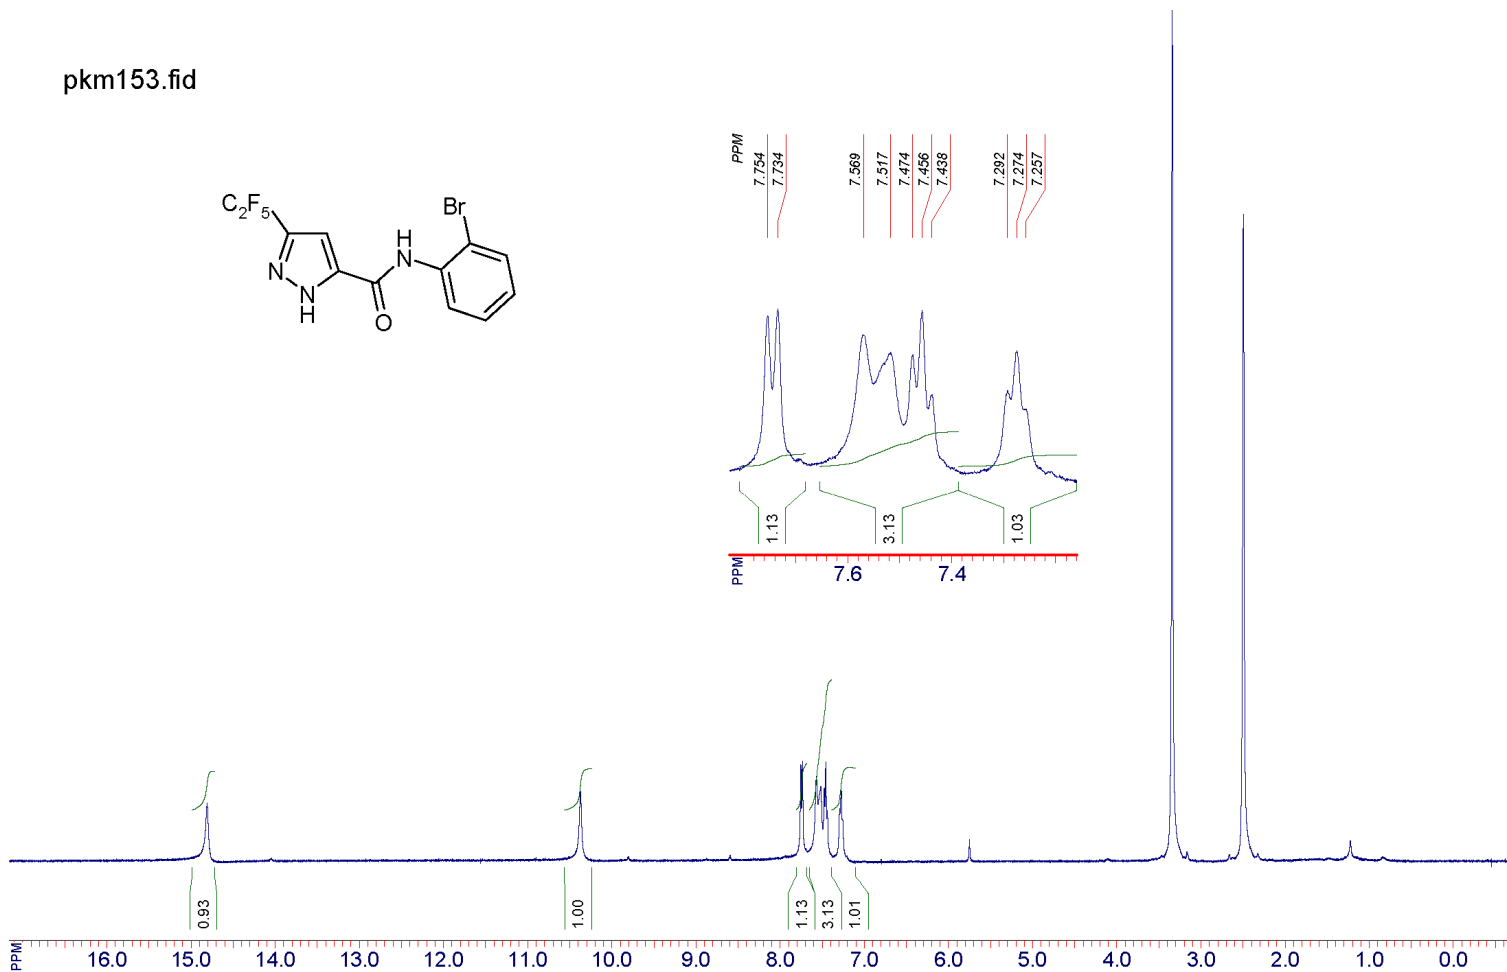

|                       |                  |                  |           |                            |           |
|-----------------------|------------------|------------------|-----------|----------------------------|-----------|
| File name: pkm153.fid | Operator:        | SF: 400.0019 MHz | NSC: 0    | PW: 7.50 usec, RG: 26      | SI: 32768 |
| Date: 31-Jan-2014     | Solvent: dms0_d6 | SW: 7175 Hz      | TE: 293 K | AQ: 1.67 sec, RD: 0.00 sec | □         |

pkm153\_C13

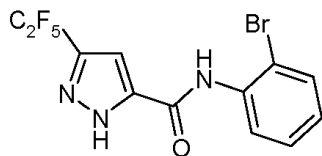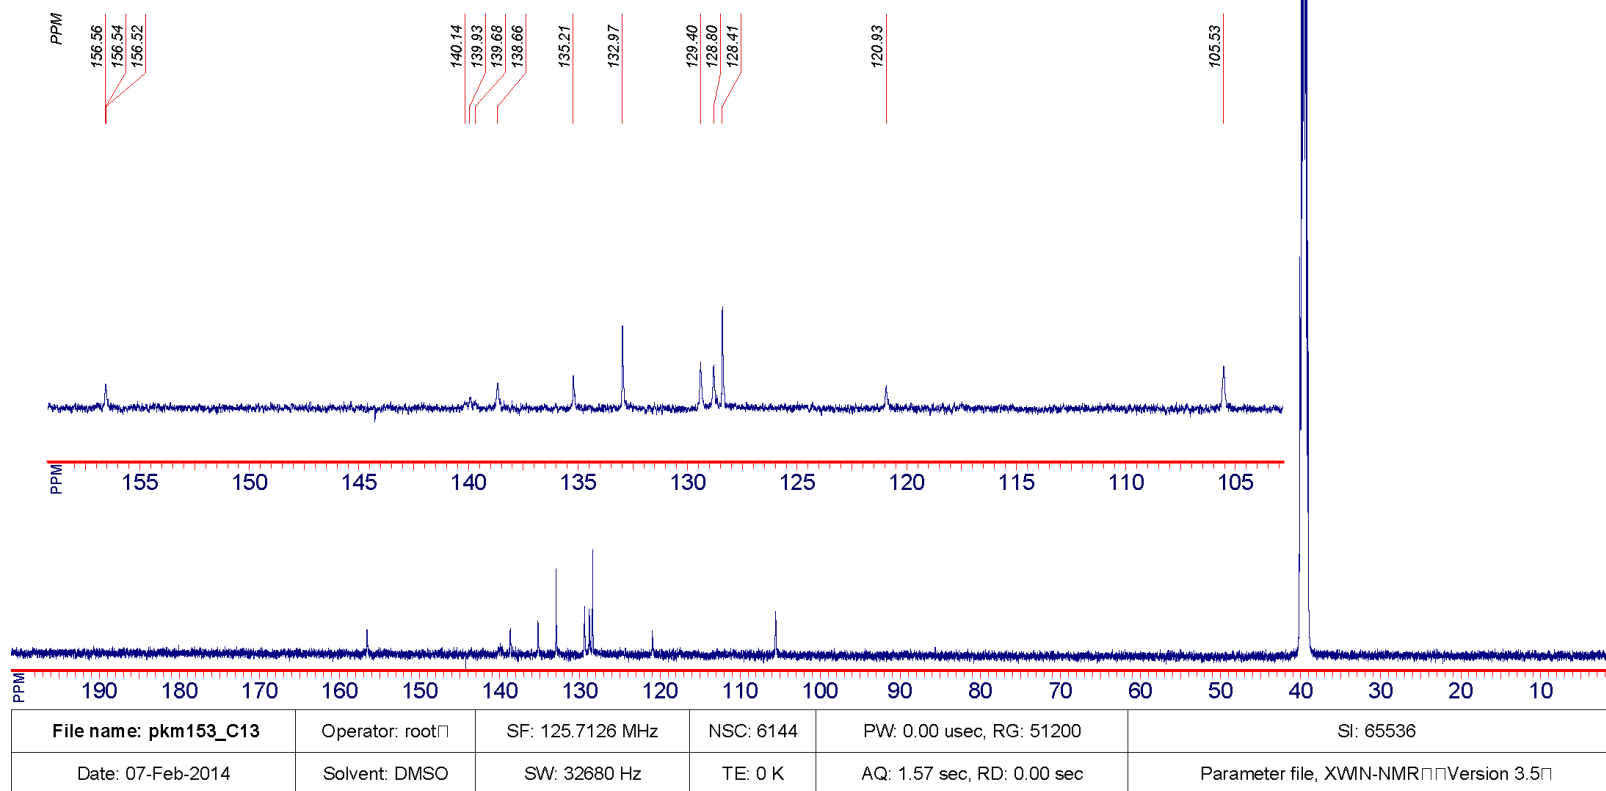

PPM

-83.21

-110.59

pkm153-F19.fid

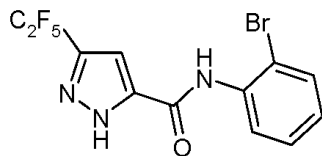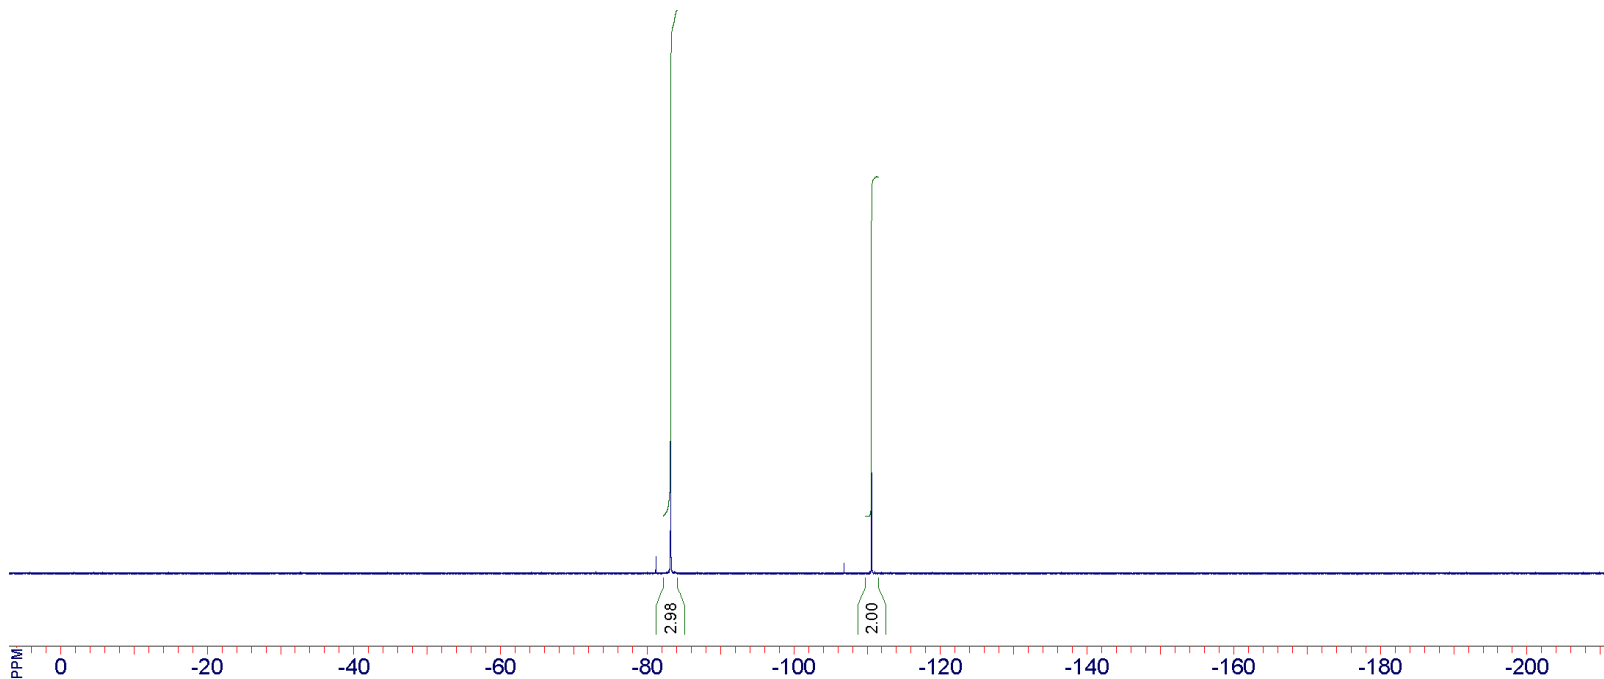

|                           |                   |                  |           |                            |           |
|---------------------------|-------------------|------------------|-----------|----------------------------|-----------|
| File name: pkm153-F19.fid | Operator:         | SF: 376.3274 MHz | NSC: 0    | PW: 3.00 usec, RG: 60      | SI: 65536 |
| Date: 06-Mar-2014         | Solvent: dmsol-d6 | SW: 82816 Hz     | TE: 293 K | AQ: 0.39 sec, RD: 0.00 sec | □         |



Compound 6a

PPM

11.775

6.959

3.860  
3.844  
3.827  
3.810  
3.793

pkm114

PPM  
2.495  
2.478  
2.457  
2.438  
2.422  
2.418  
2.329  
2.130  
1.964

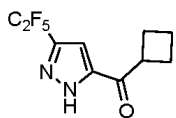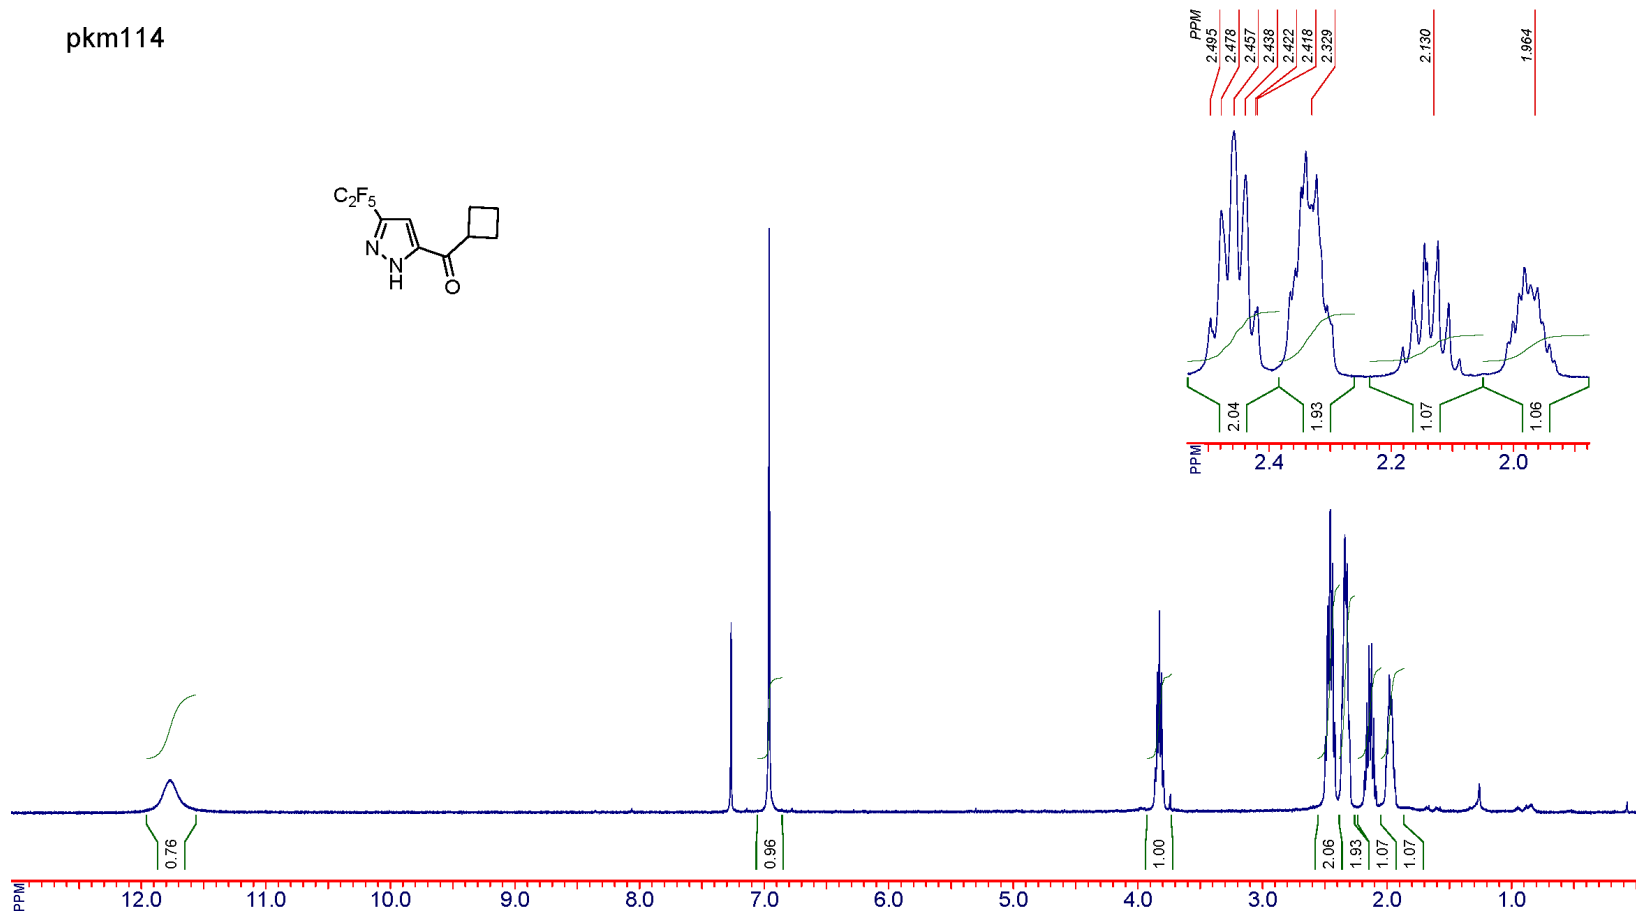

|                   |                |                  |         |                            |                                     |
|-------------------|----------------|------------------|---------|----------------------------|-------------------------------------|
| File name: pkm114 | Operator: root | SF: 499.9500 MHz | NSC: 1  | PW: 0.00 usec, RG: 100     | SI: 32768                           |
| Date: 21-Nov-2013 | Solvent: CDCl3 | SW: 8993 Hz      | TE: 0 K | AQ: 1.82 sec, RD: 0.00 sec | Parameter file, XWIN-NMRVersion 3.5 |

PPM

191.52

107.15

42.51

24.33

17.82

pkm114\_C13

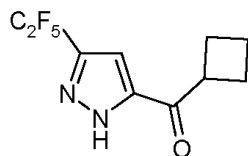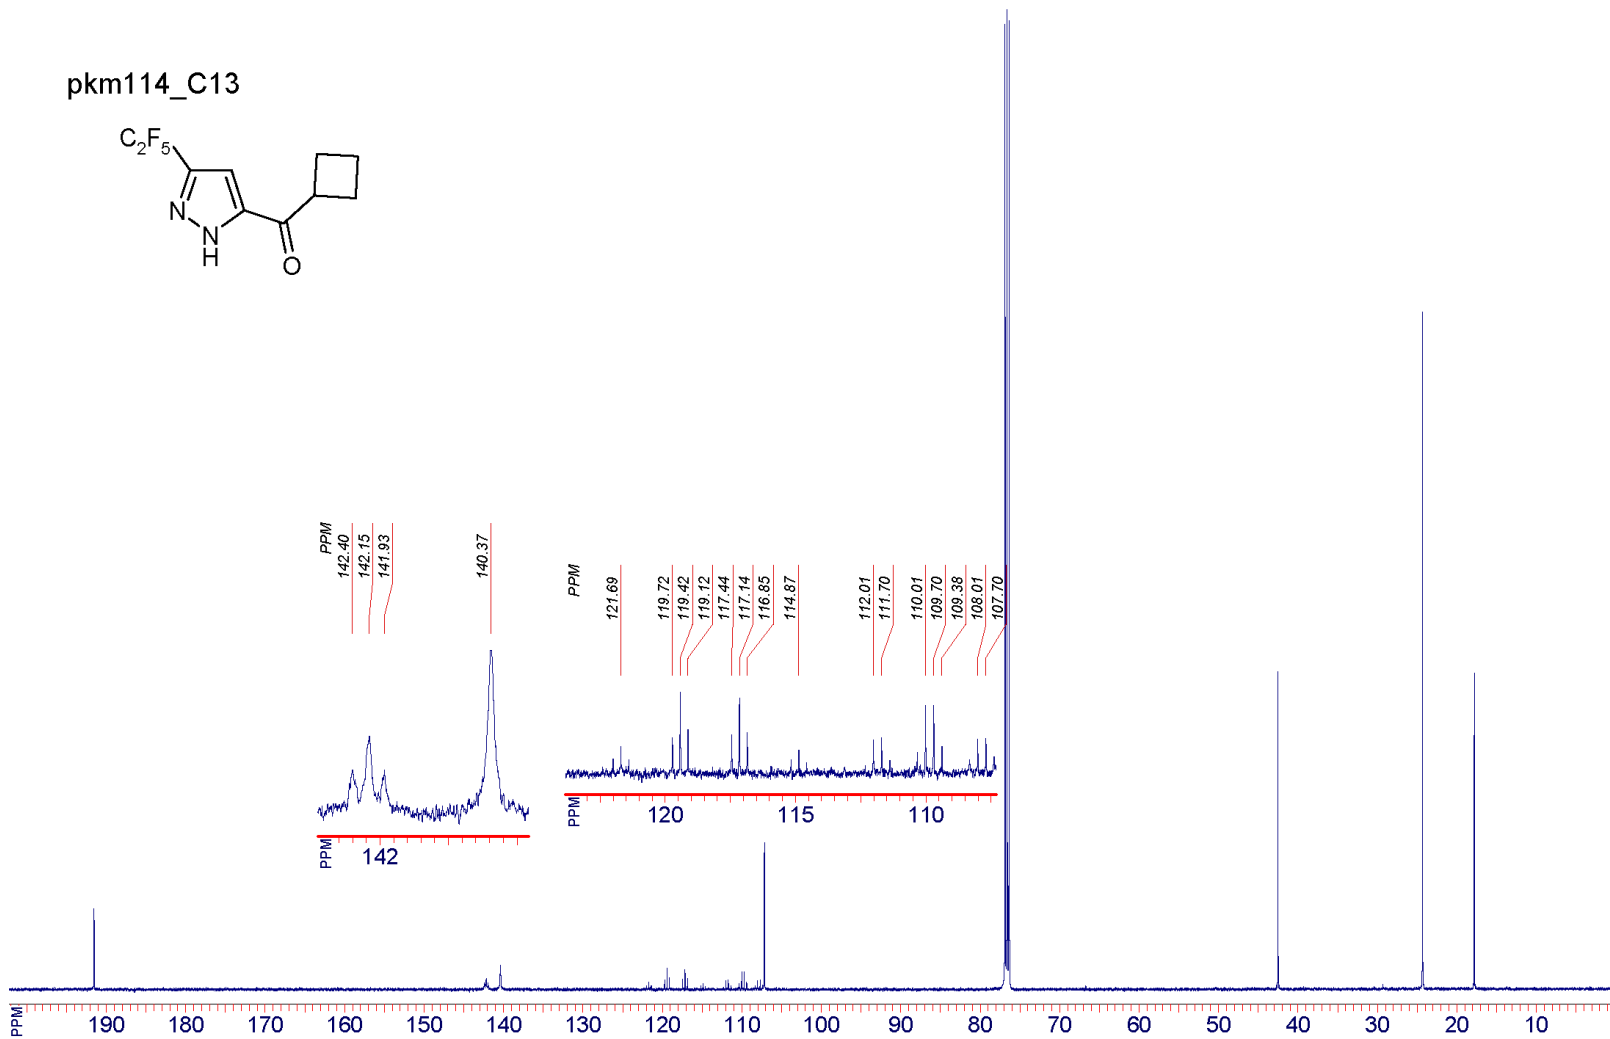

|                       |                |                  |            |                            |                                      |
|-----------------------|----------------|------------------|------------|----------------------------|--------------------------------------|
| File name: pkm114_C13 | Operator: root | SF: 125.7126 MHz | NSC: 10240 | PW: 0.00 usec, RG: 51200   | SI: 65536                            |
| Date: 07-Dec-2013     | Solvent: dms   | SW: 32680 Hz     | TE: 0 K    | AQ: 1.57 sec, RD: 0.00 sec | Parameter file, XWIN-NMR Version 3.5 |

PPM

pkm114\_F19.fid

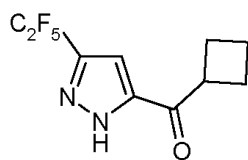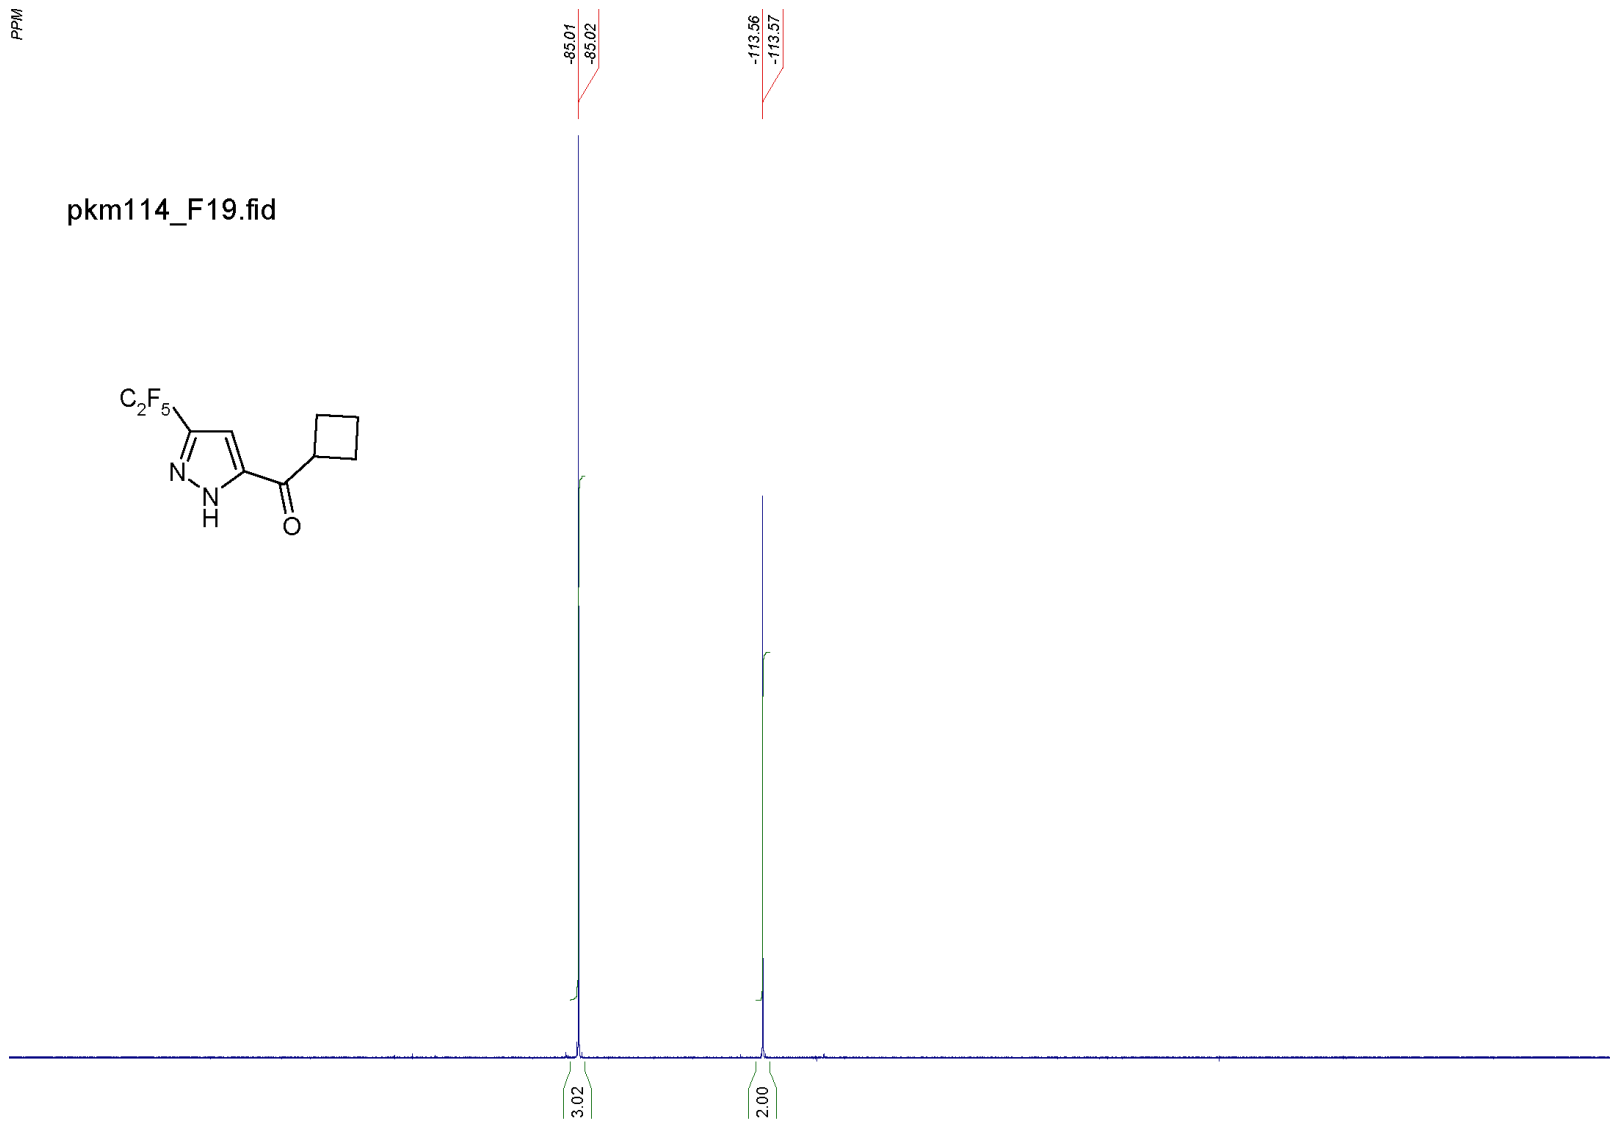

|                           |                |                  |           |                            |            |
|---------------------------|----------------|------------------|-----------|----------------------------|------------|
| File name: pkm114_F19.fid | Operator:      | SF: 376.3189 MHz | NSC: 0    | PW: 3.00 usec, RG: 16      | SI: 131072 |
| Date: 10-Dec-2013         | Solvent: cdcl3 | SW: 94118 Hz     | TE: 293 K | AQ: 0.68 sec, RD: 0.00 sec | □          |

# Compound 7a

PPM

11.672

7.962

7.248

7.044

4.158

pkm82.fid

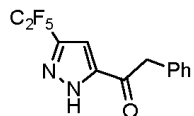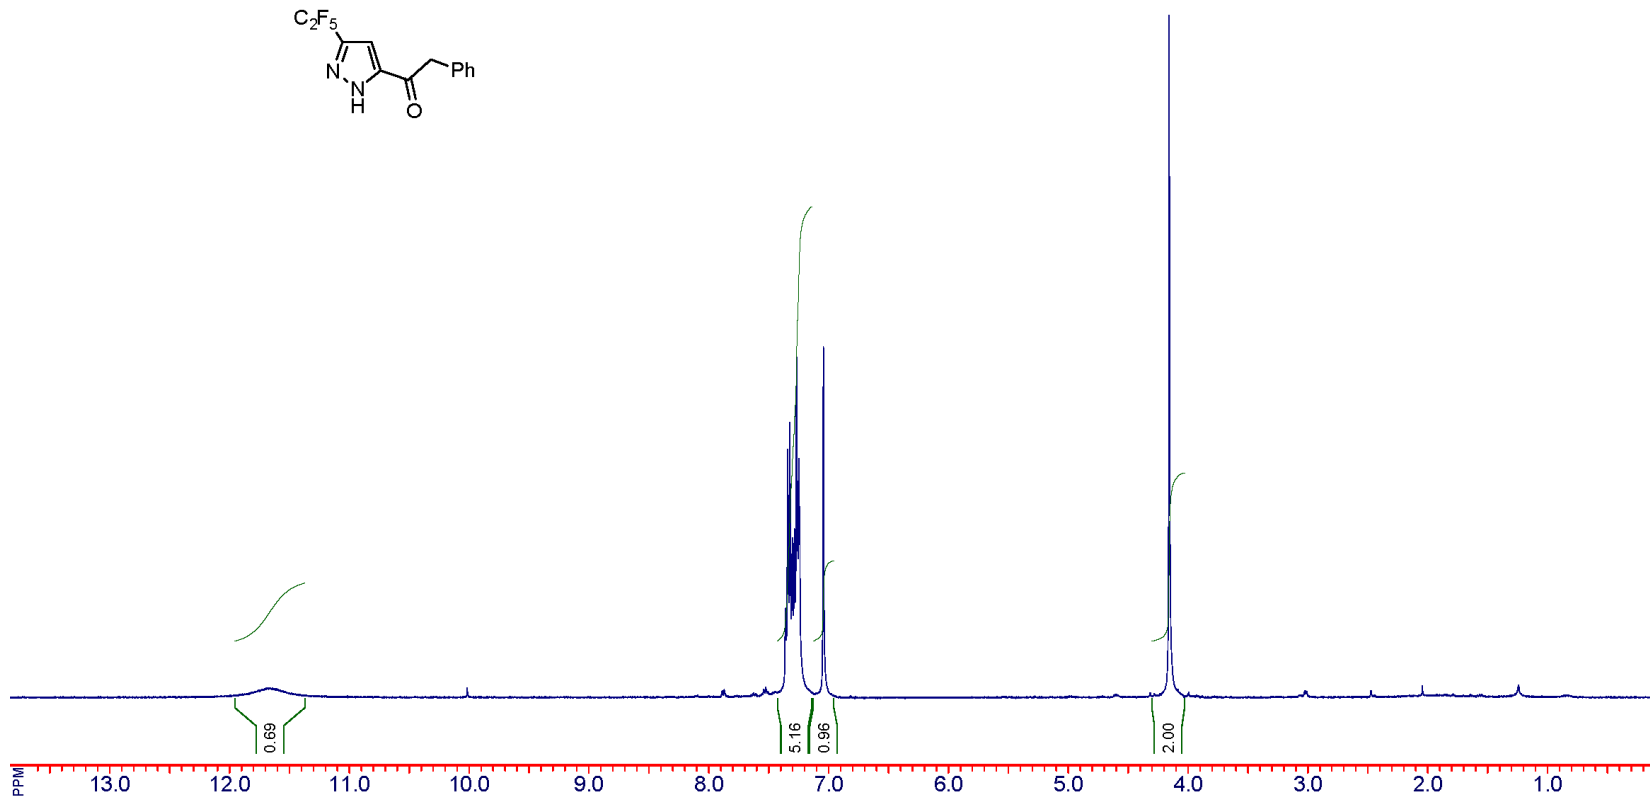

|                      |                |                  |           |                            |           |
|----------------------|----------------|------------------|-----------|----------------------------|-----------|
| File name: pkm82.fid | Operator:      | SF: 400.0002 MHz | NSC: 0    | PW: 7.50 usec, RG: 26      | SI: 32768 |
| Date: 10-Oct-2013    | Solvent: CDCl3 | SW: 7261 Hz      | TE: 293 K | AQ: 1.24 sec, RD: 0.00 sec |           |

PPM

187.80

142.00

141.34

132.01

129.07

128.61

127.29

107.89

46.12

pkm82\_C13

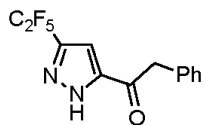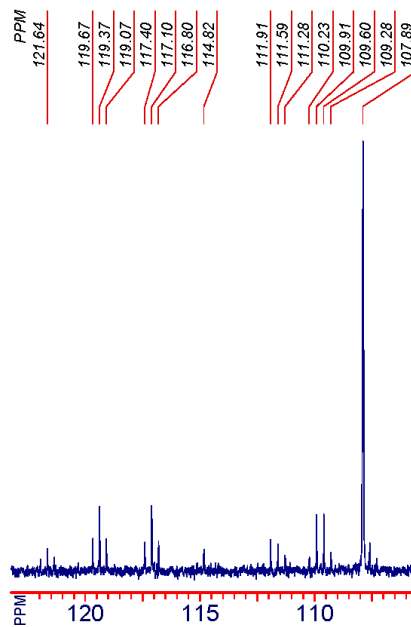

PPM

File name: pkm82\_C13

Operator: root

SF: 125.7126 MHz

NSC: 6144

PW: 0.00 usec, RG: 51200

SI: 65536

Date: 13-Oct-2013

Solvent: CDCl3

SW: 32680 Hz

TE: 0 K

AQ: 1.57 sec, RD: 0.00 sec

Parameter file, XWIN-NMRVersion 3.5

PPM

pkm82\_F19.fid

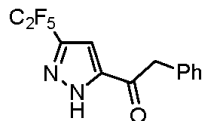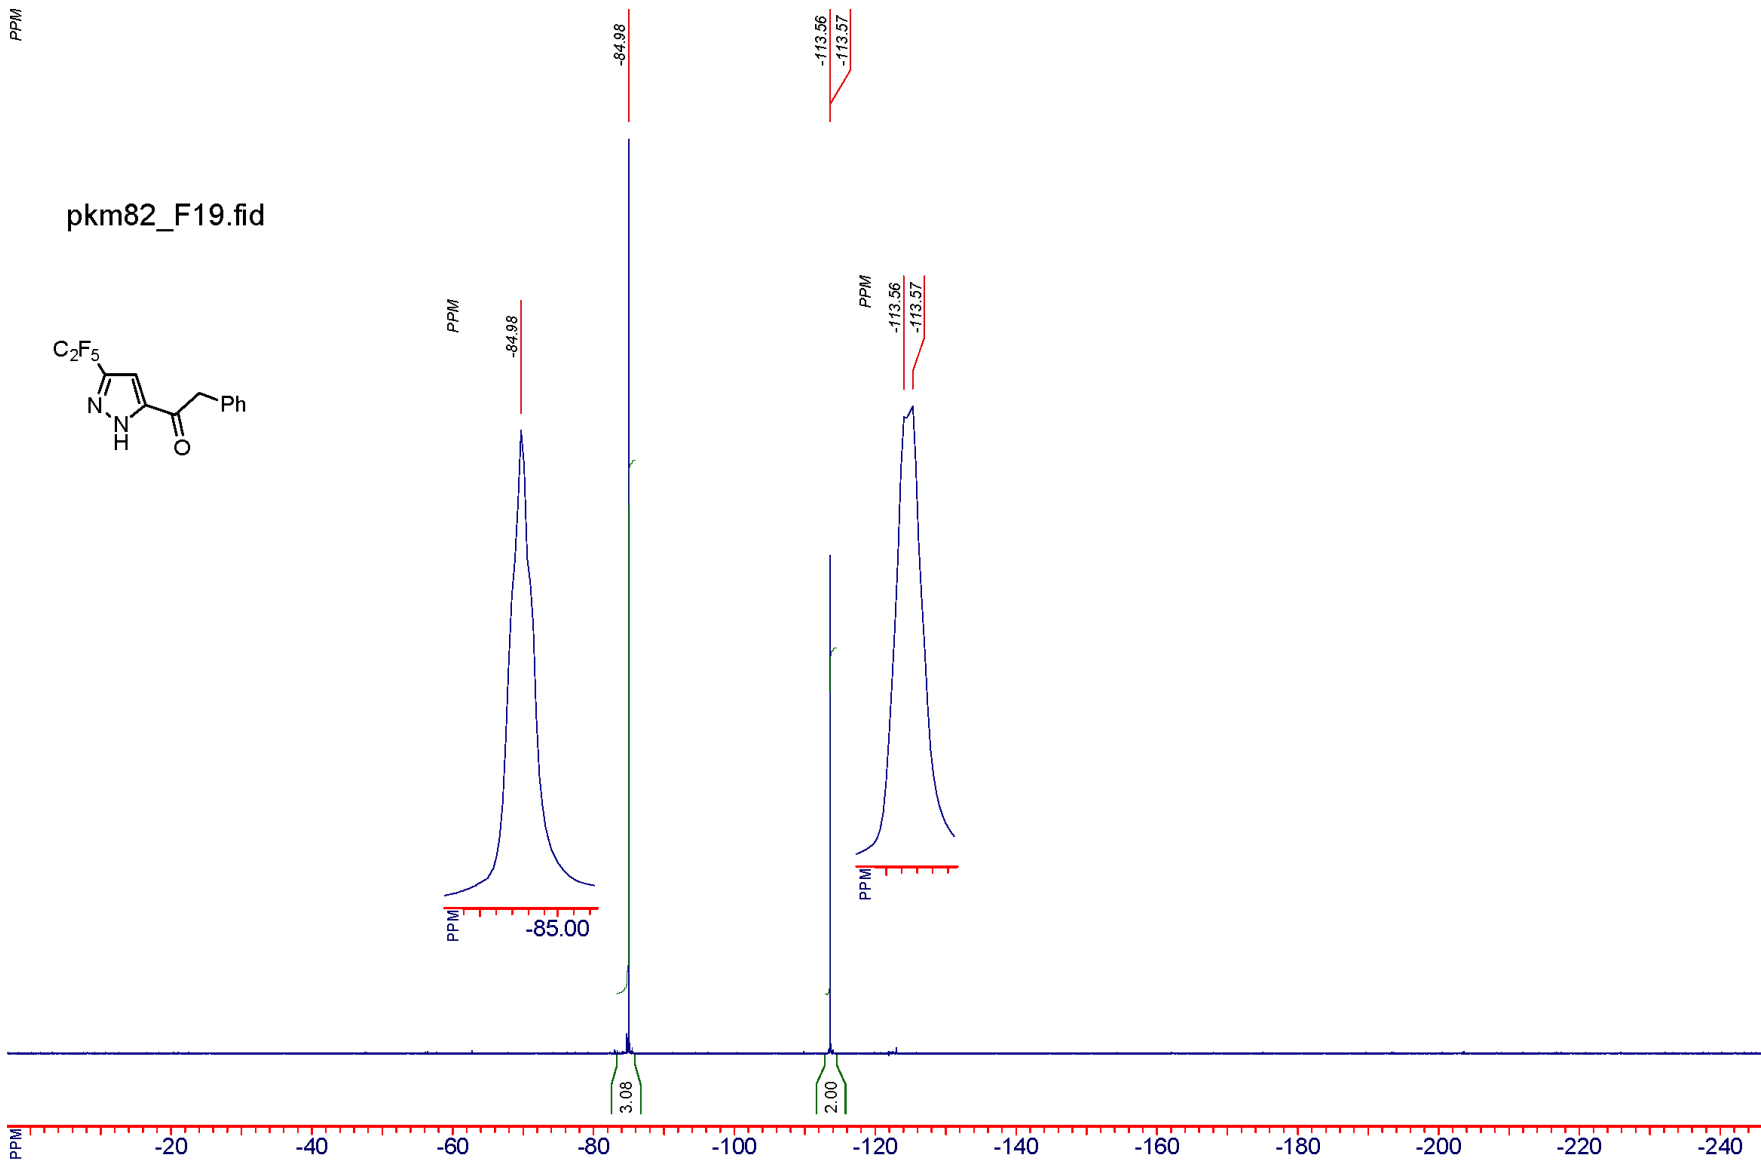

|                          |                |                  |           |                            |            |
|--------------------------|----------------|------------------|-----------|----------------------------|------------|
| File name: pkm82_F19.fid | Operator:      | SF: 376.3189 MHz | NSC: 0    | PW: 3.00 usec, RG: 16      | SI: 131072 |
| Date: 15-Oct-2013        | Solvent: cdcl3 | SW: 94118 Hz     | TE: 293 K | AQ: 0.68 sec, RD: 0.00 sec |            |

# Compound 8a

PPM

7.322  
7.307  
7.293  
7.245  
7.230  
7.036

3.261  
3.246  
3.231  
3.108  
3.093  
3.078

pkm199

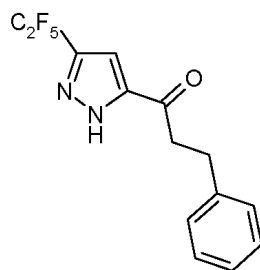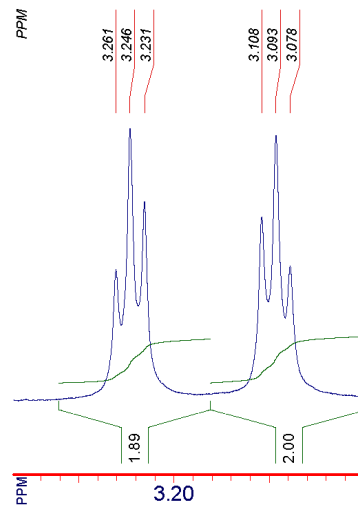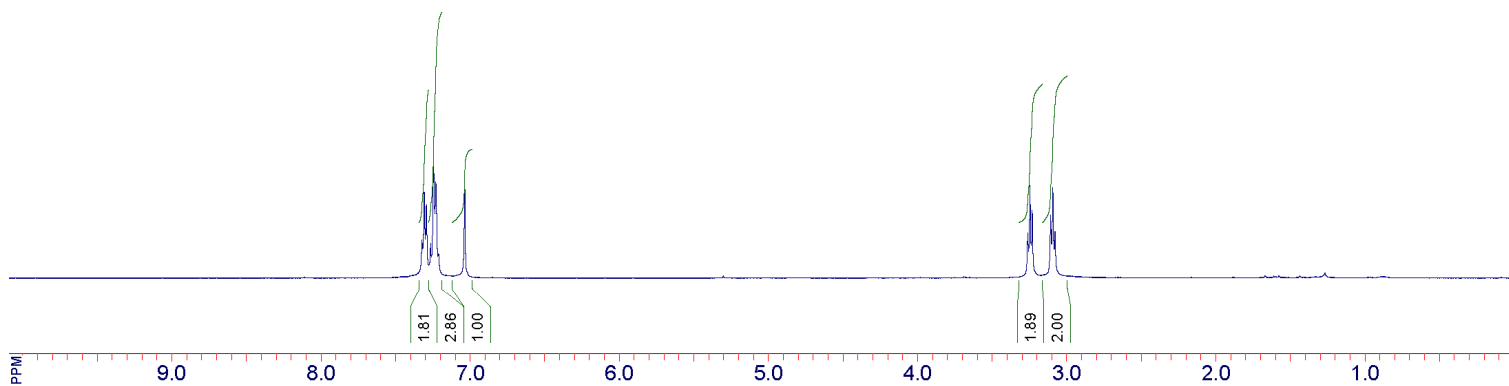

|                   |                |                  |         |                            |                                      |
|-------------------|----------------|------------------|---------|----------------------------|--------------------------------------|
| File name: pkm199 | Operator: root | SF: 499.9500 MHz | NSC: 1  | PW: 0.00 usec, RG: 40      | SI: 32768                            |
| Date: 12-May-2014 | Solvent: CDCl3 | SW: 8993 Hz      | TE: 0 K | AQ: 1.82 sec, RD: 0.00 sec | Parameter file, XWIN-NMR Version 3.5 |

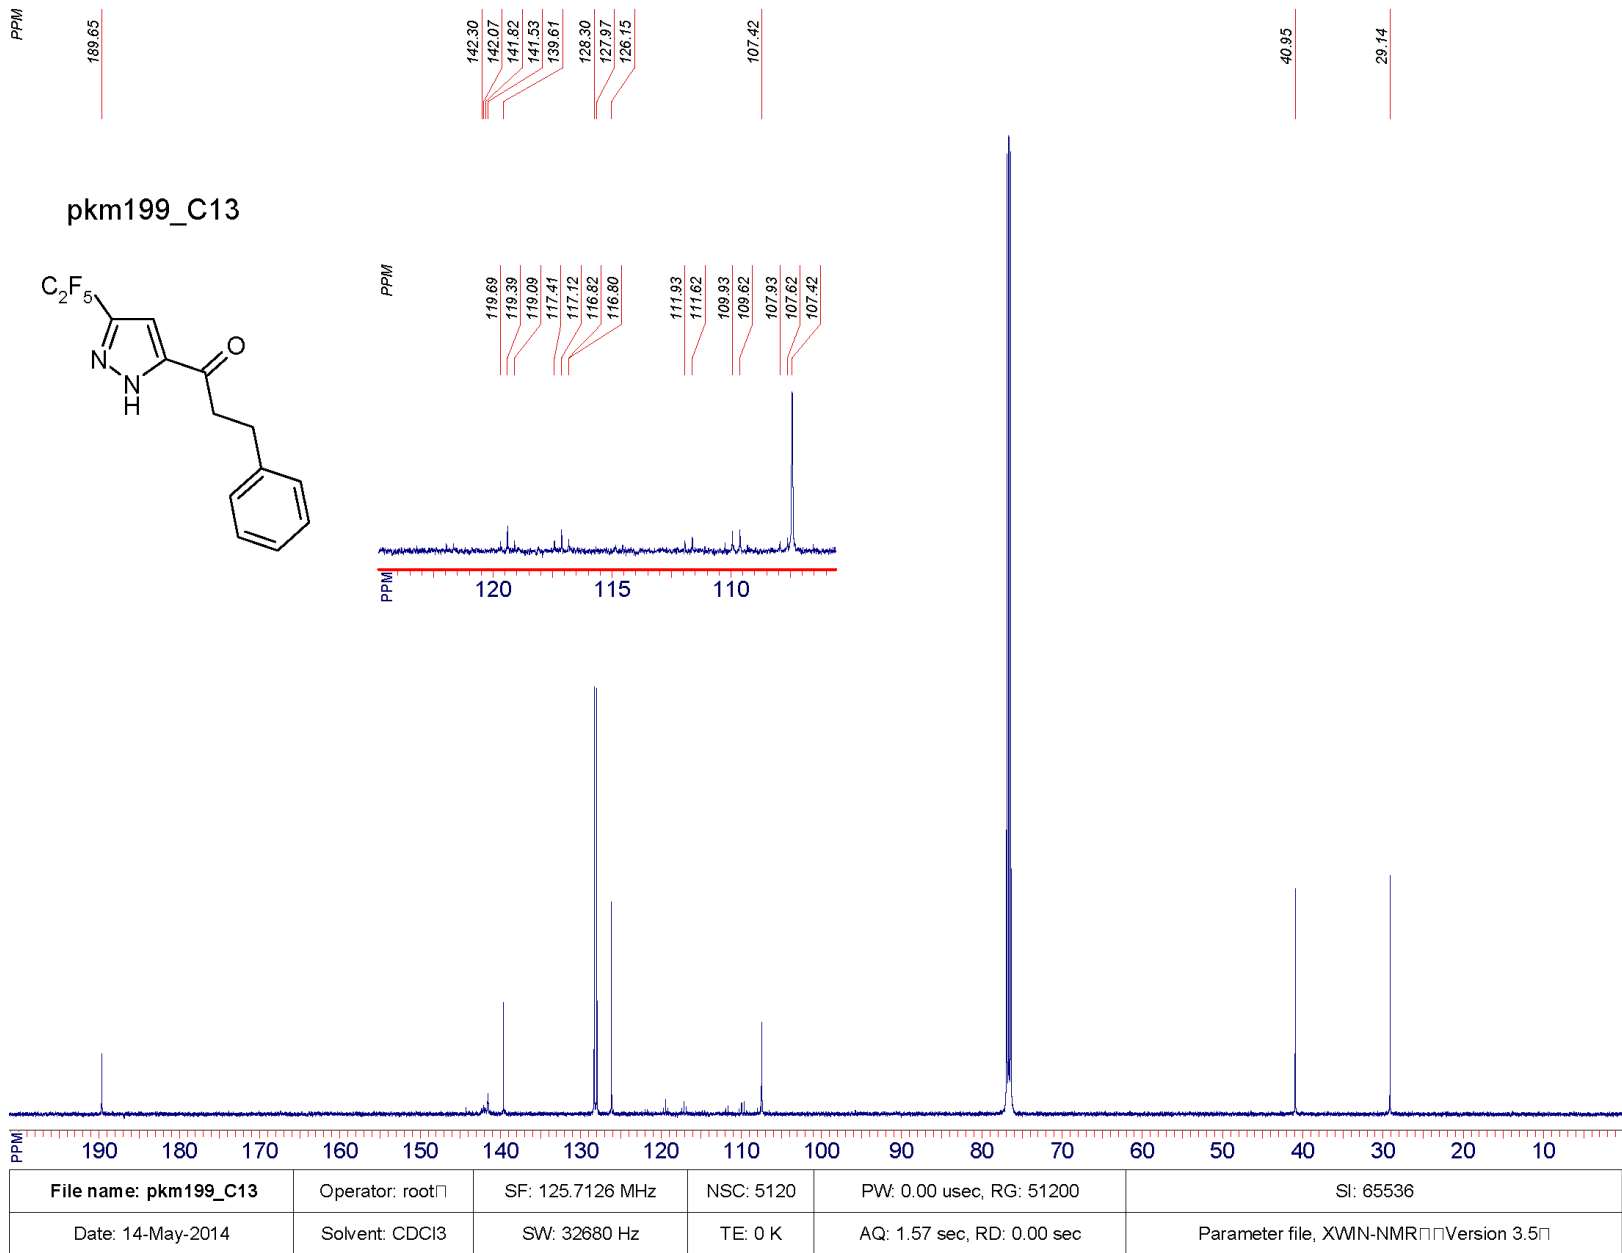



PPM

Pkm199\_F19.fid

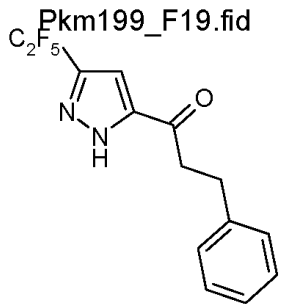

-65.01  
-113.63

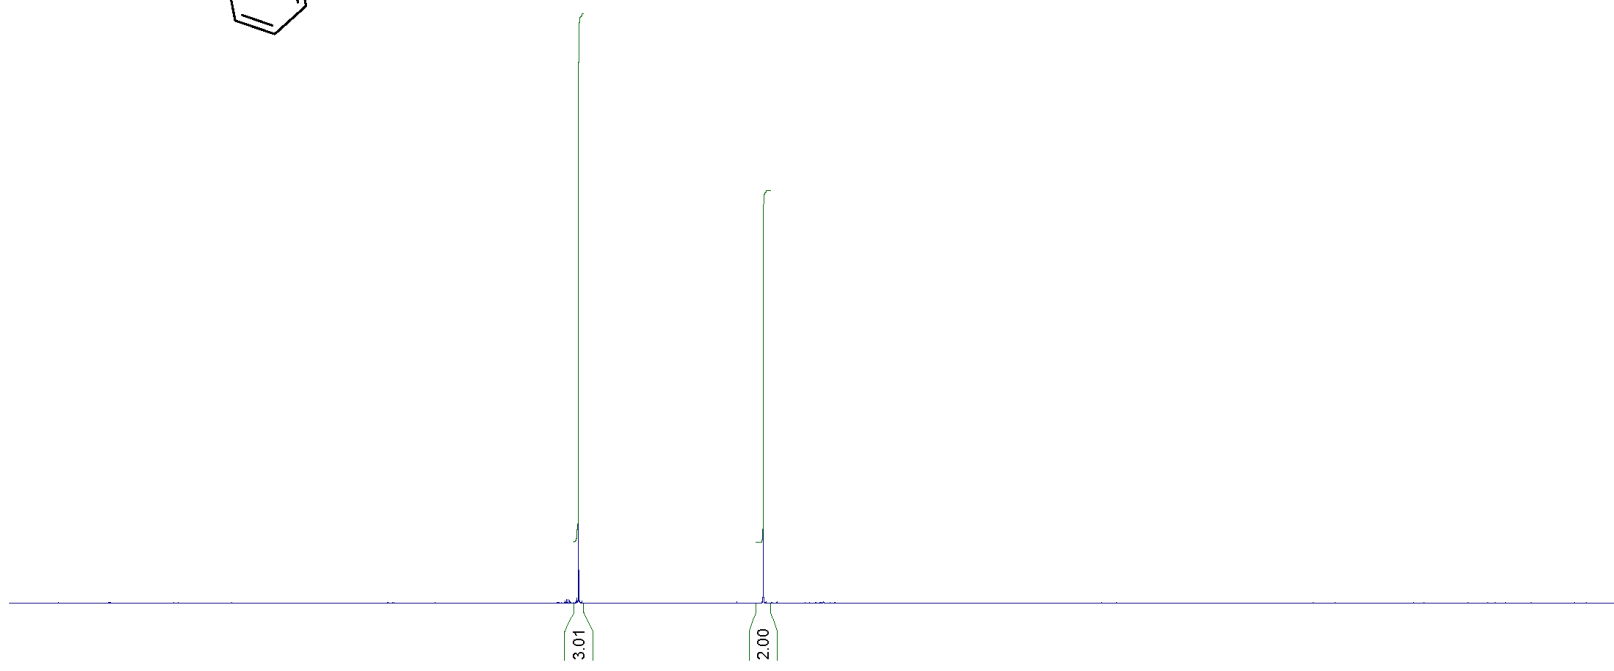

|                           |                |                  |           |                            |           |
|---------------------------|----------------|------------------|-----------|----------------------------|-----------|
| File name: Pkm199_F19.fid | Operator:      | SF: 376.3189 MHz | NSC: 0    | PW: 3.00 usec, RG: 32      | SI: 65536 |
| Date: 20-May-2014         | Solvent: cdcl3 | SW: 94118 Hz     | TE: 293 K | AQ: 0.34 sec, RD: 0.00 sec | □         |

# Compound 9a

PPM

14.776

7.666

7.559

6.815

pkm81

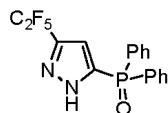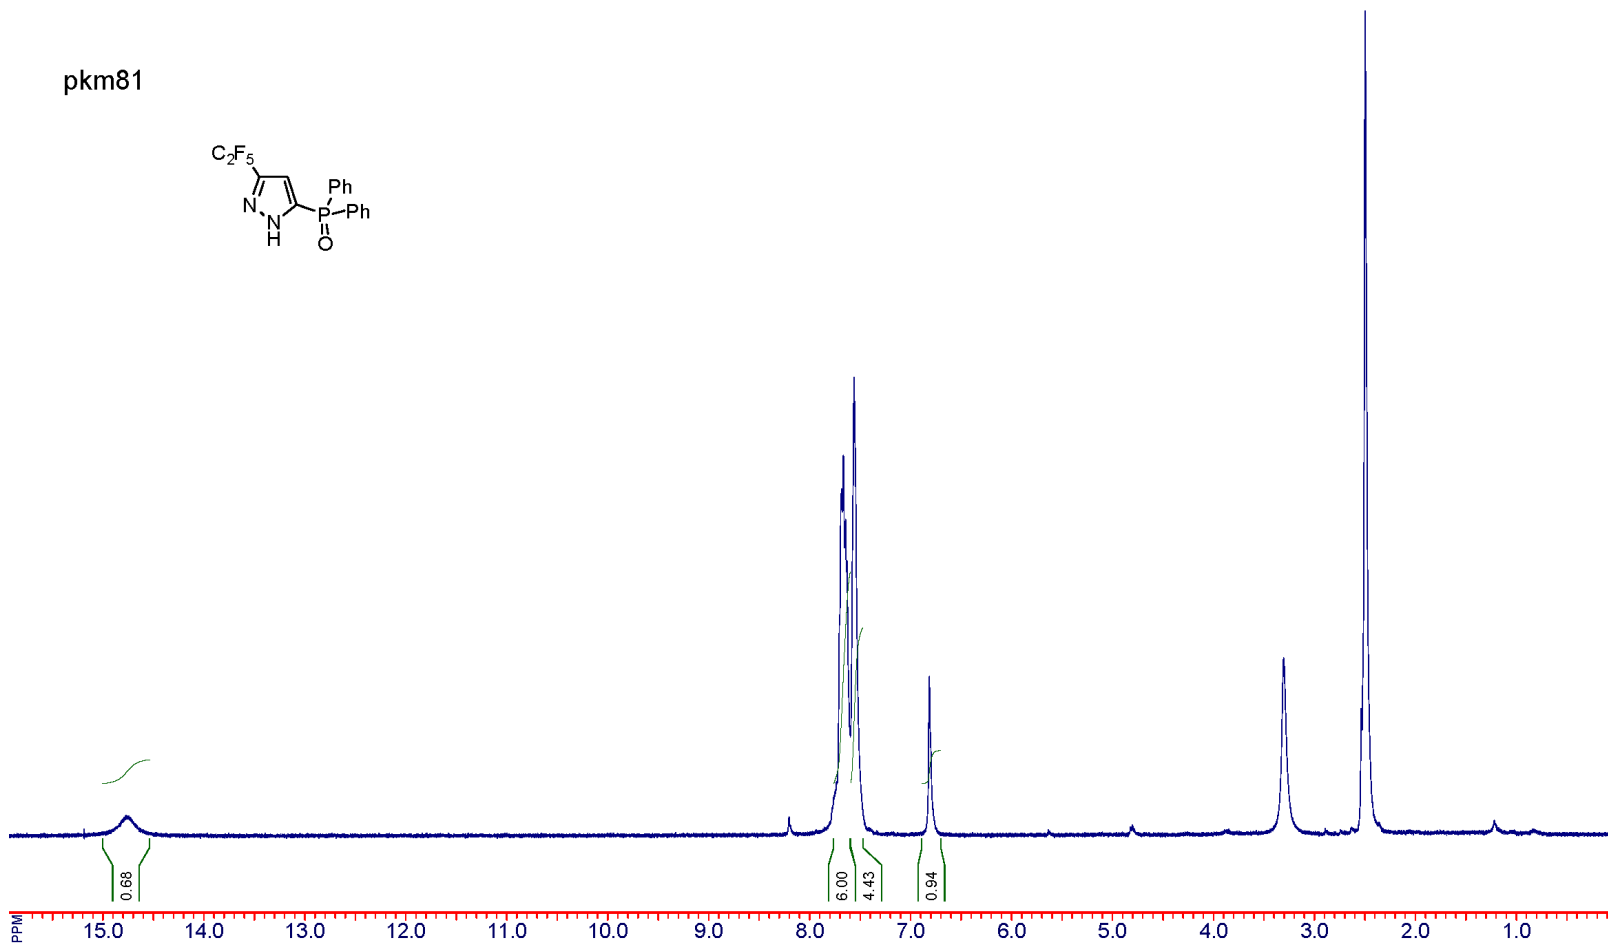

|                   |                |                  |         |                            |                                     |
|-------------------|----------------|------------------|---------|----------------------------|-------------------------------------|
| File name: pkm81  | Operator: root | SF: 499.9500 MHz | NSC: 1  | PW: 0.00 usec, RG: 32      | SI: 32768                           |
| Date: 10-Oct-2013 | Solvent: DMSO  | SW: 8993 Hz      | TE: 0 K | AQ: 1.82 sec, RD: 0.00 sec | Parameter file, XWIN-NMRVersion 3.5 |

PPM

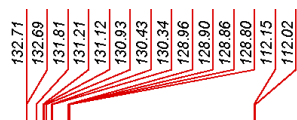

pkm81\_C13

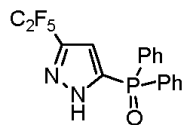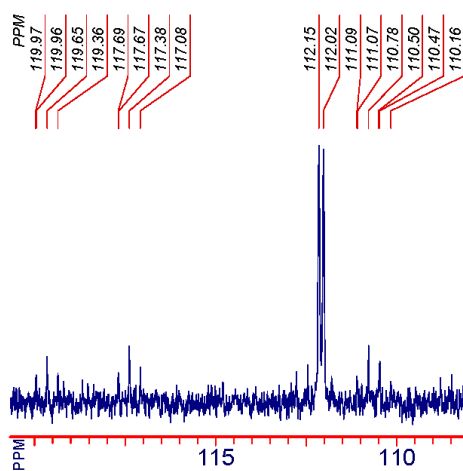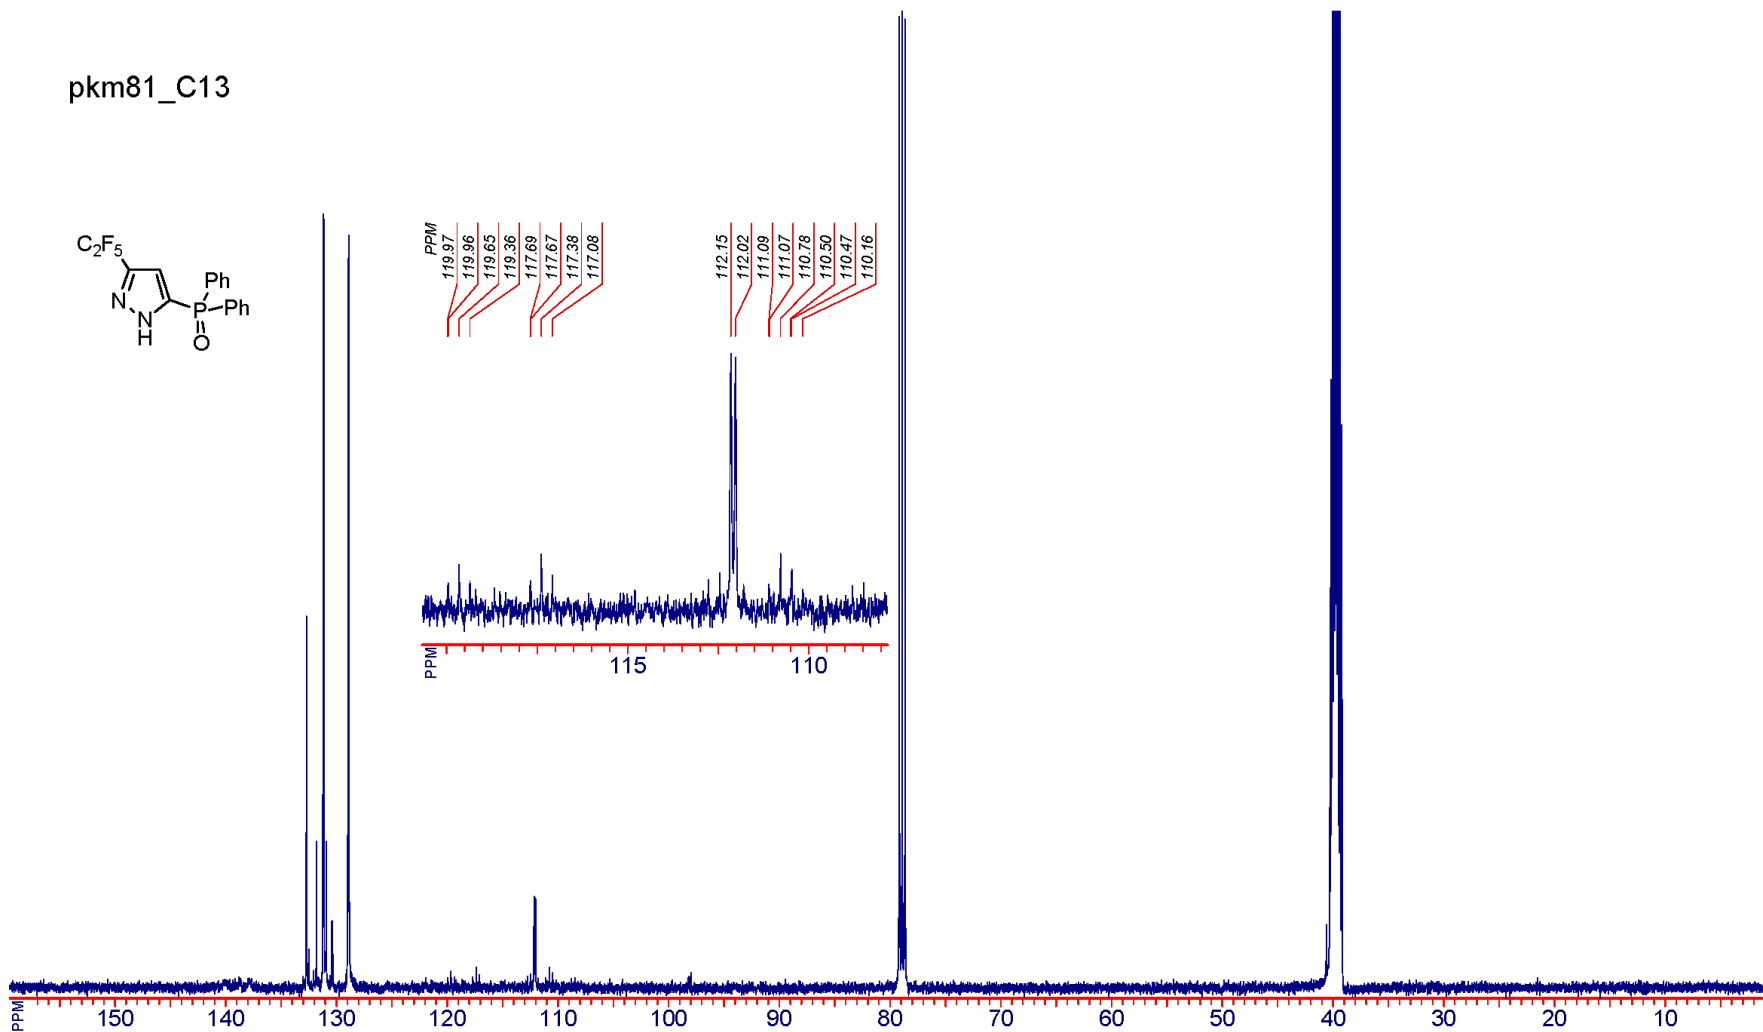

|                      |                |                  |            |                            |                                     |
|----------------------|----------------|------------------|------------|----------------------------|-------------------------------------|
| File name: pkm81_C13 | Operator: root | SF: 125.7126 MHz | NSC: 10240 | PW: 0.00 usec, RG: 51200   | SI: 65536                           |
| Date: 12-Oct-2013    | Solvent: DMSO  | SW: 32680 Hz     | TE: 0 K    | AQ: 1.57 sec, RD: 0.00 sec | Parameter file, XWMN-NMRVersion 3.5 |

PPM

pkm81\_F19.fid

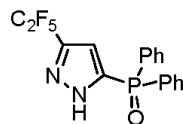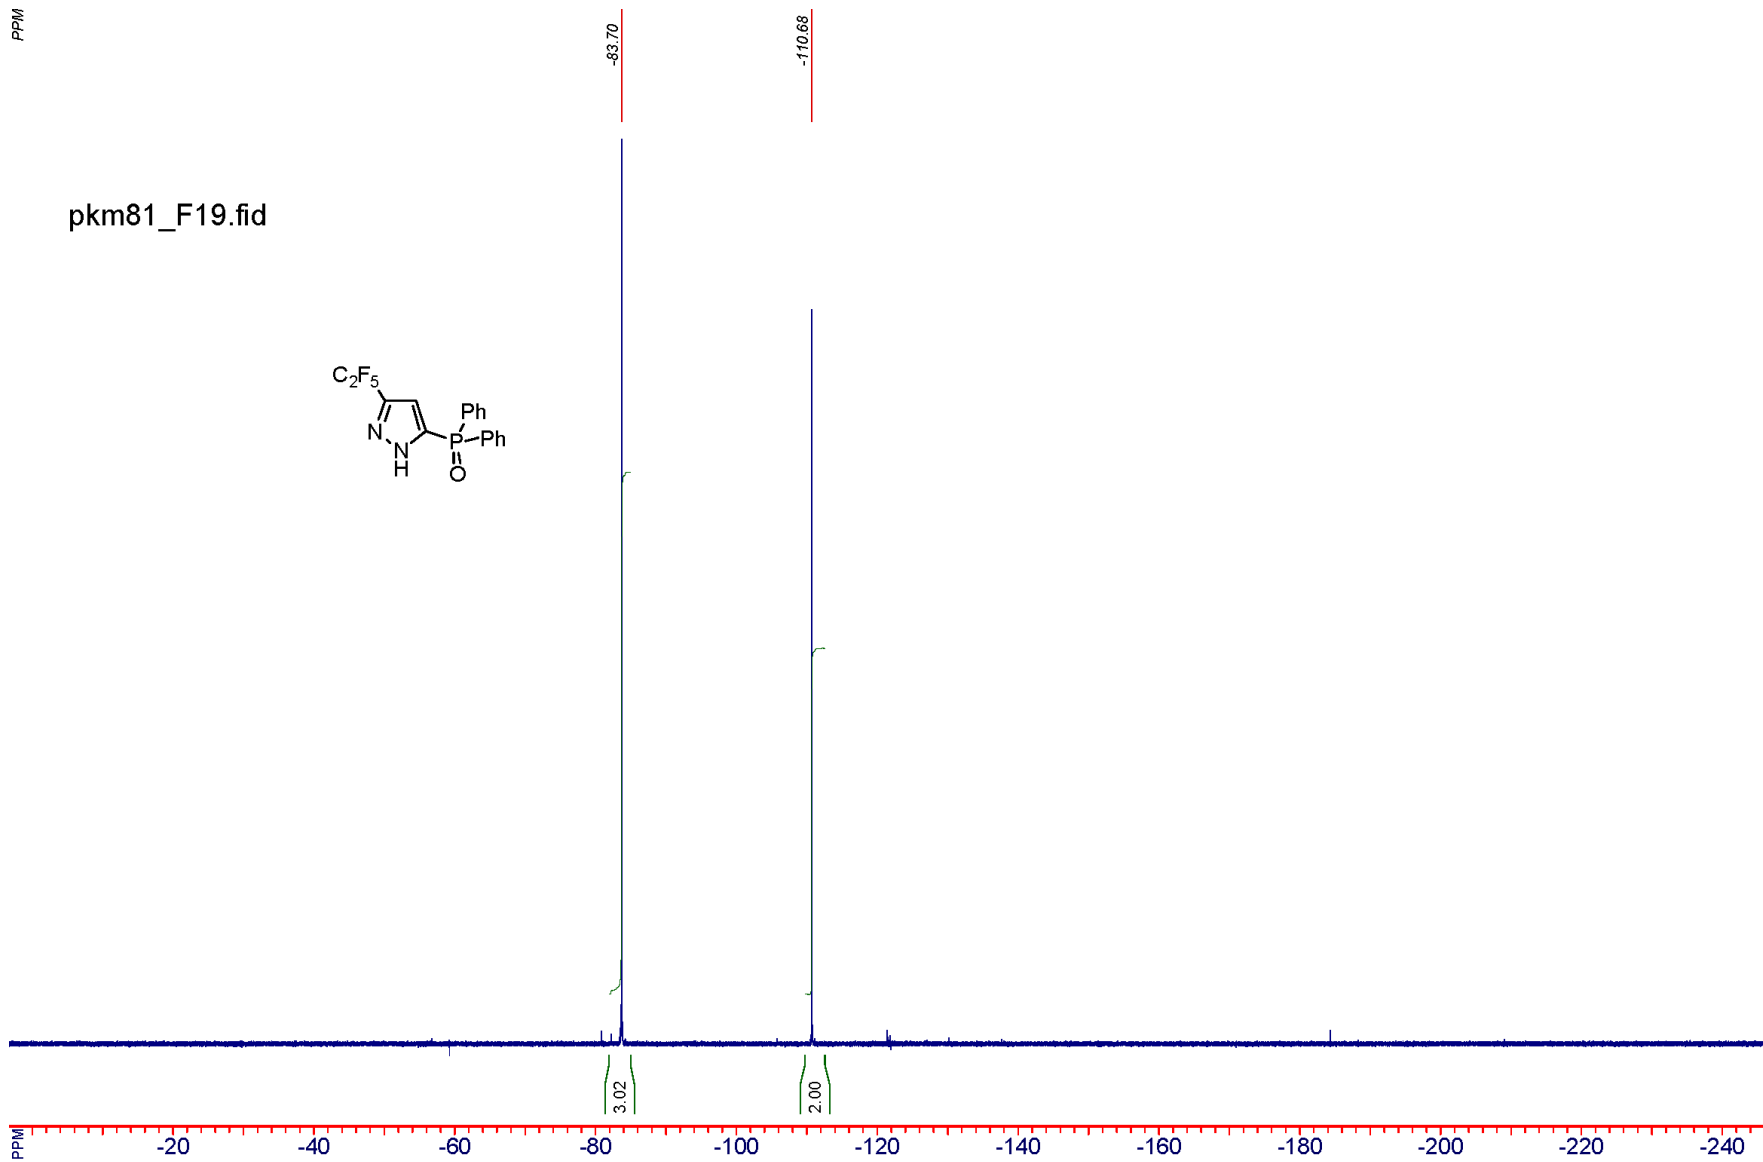

|                          |                |                  |           |                            |            |
|--------------------------|----------------|------------------|-----------|----------------------------|------------|
| File name: pkm81_F19.fid | Operator:      | SF: 376.3189 MHz | NSC: 0    | PW: 3.00 usec, RG: 16      | SI: 131072 |
| Date: 22-Oct-2013        | Solvent: cdcl3 | SW: 94118 Hz     | TE: 293 K | AQ: 0.68 sec, RD: 0.00 sec |            |

PPM

8.75

pkm81\_P31

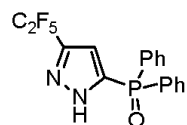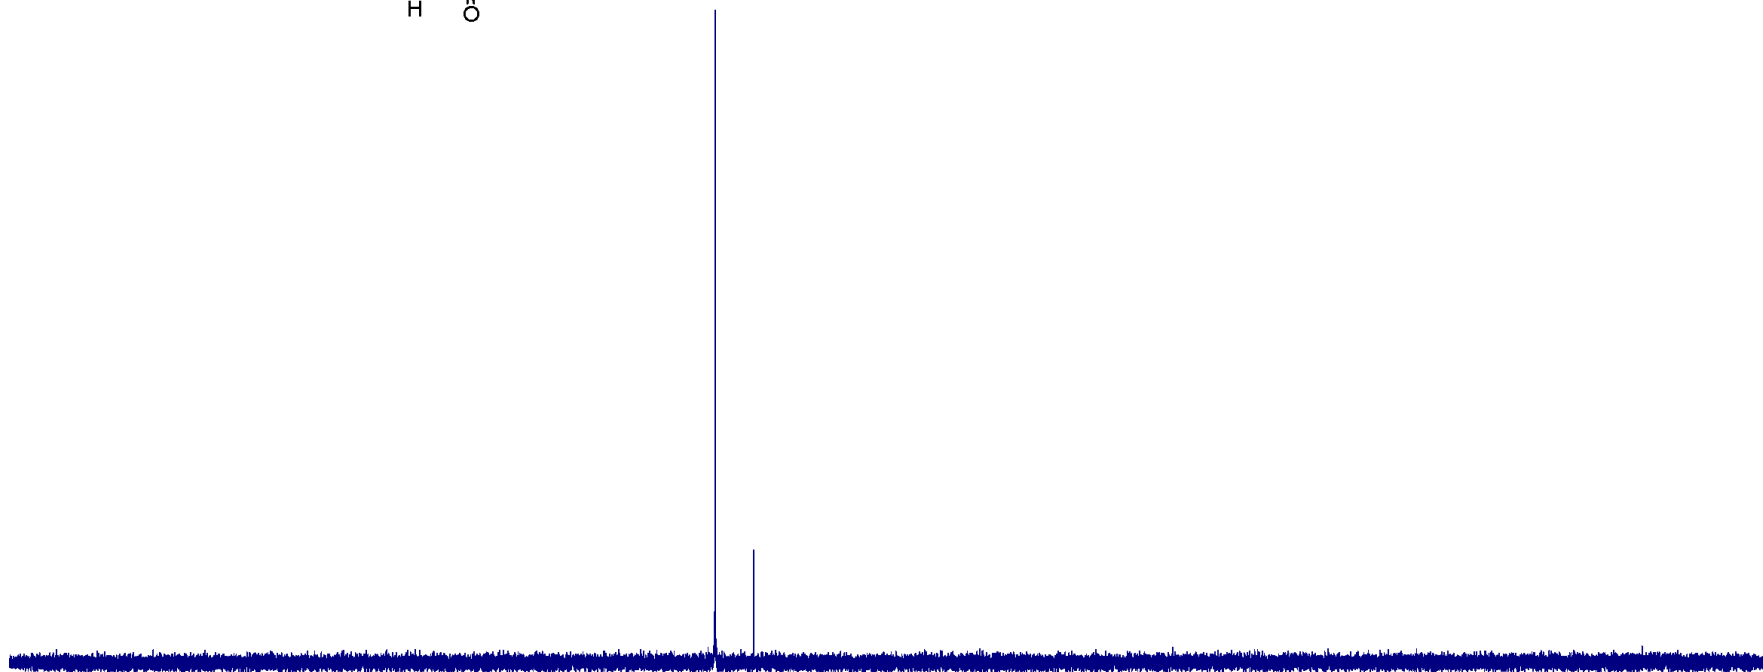

|                      |                |                  |         |                            |                                     |
|----------------------|----------------|------------------|---------|----------------------------|-------------------------------------|
| File name: pkm81_P31 | Operator: root | SF: 202.3833 MHz | NSC: 12 | PW: 0.00 usec, RG: 512     | SI: 65536                           |
| Date: 24-Oct-2013    | Solvent: CDCl3 | SW: 80645 Hz     | TE: 0 K | AQ: 0.81 sec, RD: 0.00 sec | Parameter file, XWIN-NMRVersion 3.5 |

# Compound 10a

PPM

12.070

pkm105

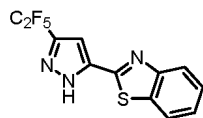

PPM

8.124  
8.116  
8.107  
7.966  
7.950

7.582  
7.567  
7.552  
7.489  
7.483  
7.468

7.128

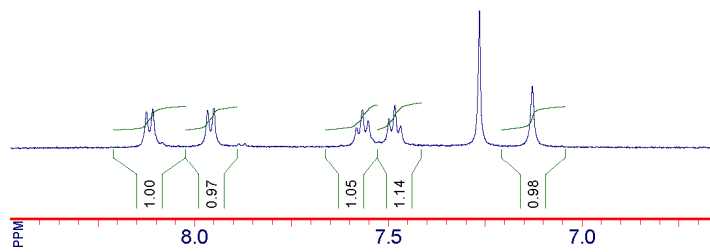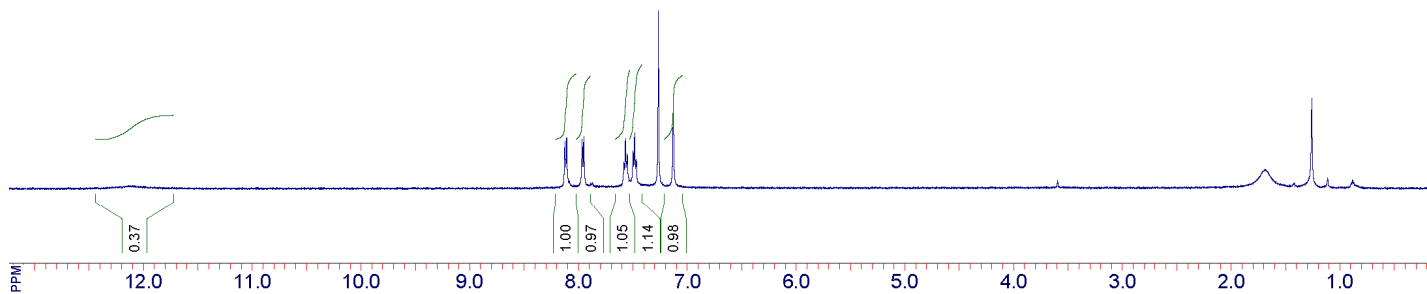

|                   |                |                  |         |                            |                                      |
|-------------------|----------------|------------------|---------|----------------------------|--------------------------------------|
| File name: pkm105 | Operator: root | SF: 499.9500 MHz | NSC: 1  | PW: 0.00 usec, RG: 24      | SI: 32768                            |
| Date: 05-Nov-2013 | Solvent: CDCl3 | SW: 8993 Hz      | TE: 0 K | AQ: 1.82 sec, RD: 0.00 sec | Parameter file, XWIN-NMR Version 3.5 |

PPM

pkm-105\_C13

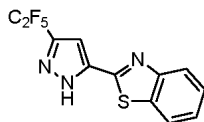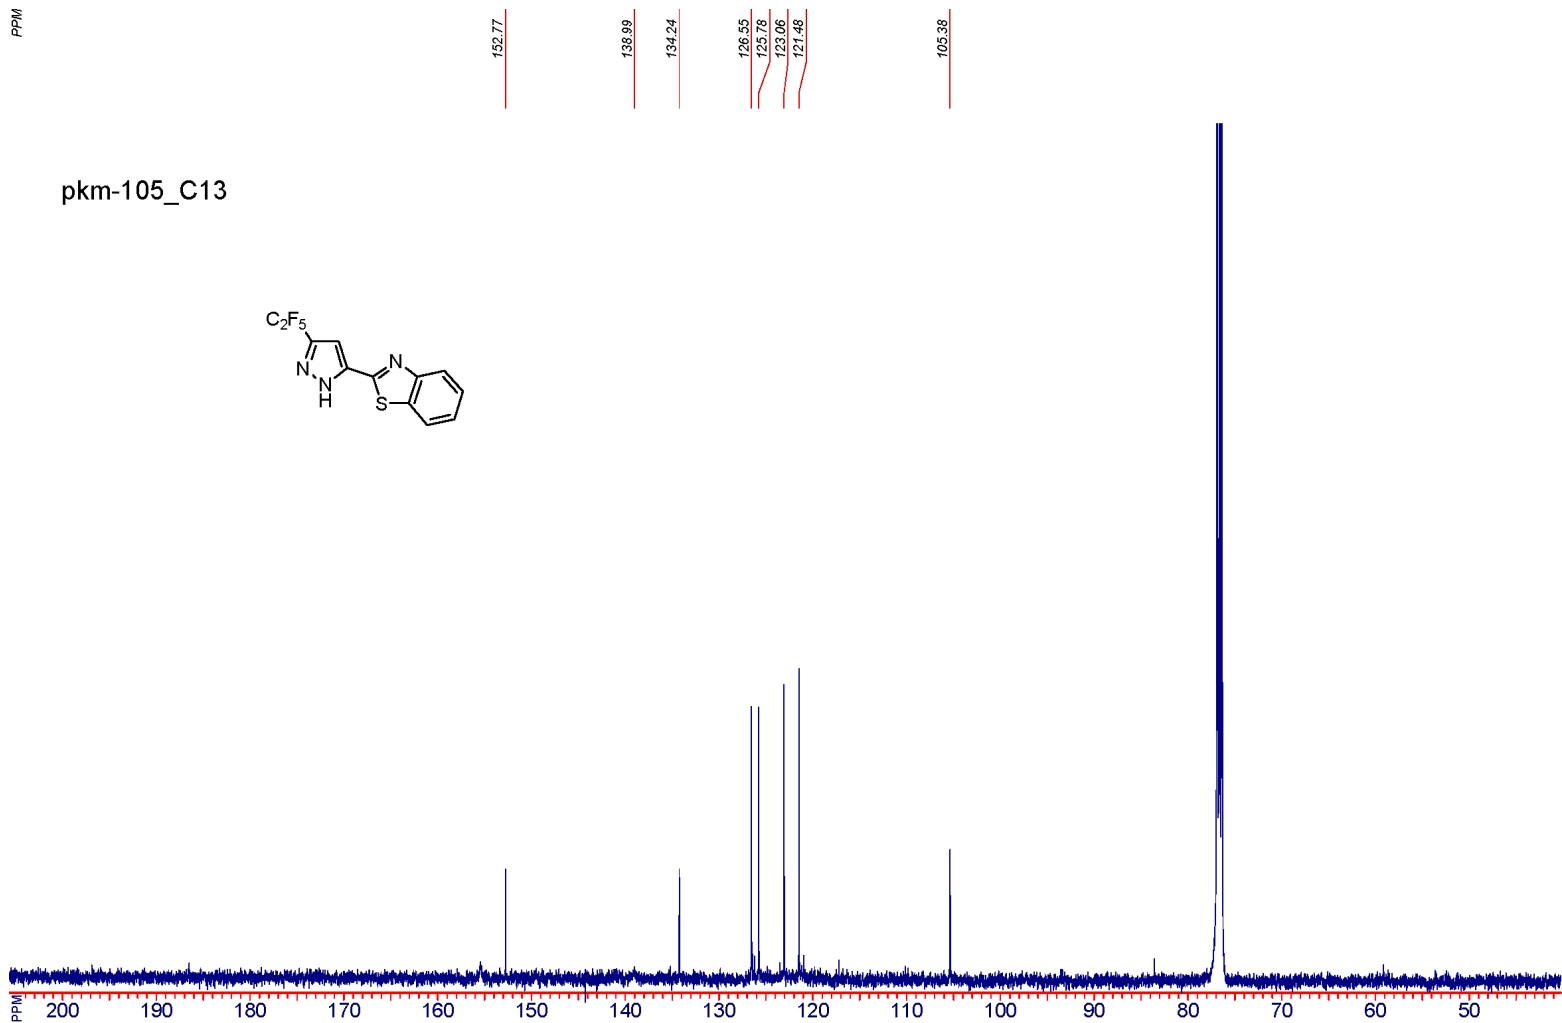

|                        |                |                  |            |                            |                                     |
|------------------------|----------------|------------------|------------|----------------------------|-------------------------------------|
| File name: pkm-105_C13 | Operator: root | SF: 125.7126 MHz | NSC: 10240 | PW: 0.00 usec, RG: 51200   | SI: 65536                           |
| Date: 10-Nov-2013      | Solvent: dms0  | SW: 32680 Hz     | TE: 0 K    | AQ: 1.57 sec, RD: 0.00 sec | Parameter file, XWIN-NMRVersion 3.5 |

PPM

-64.95

-113.40

pkm105\_F19.fid

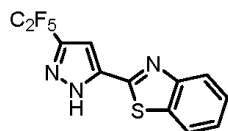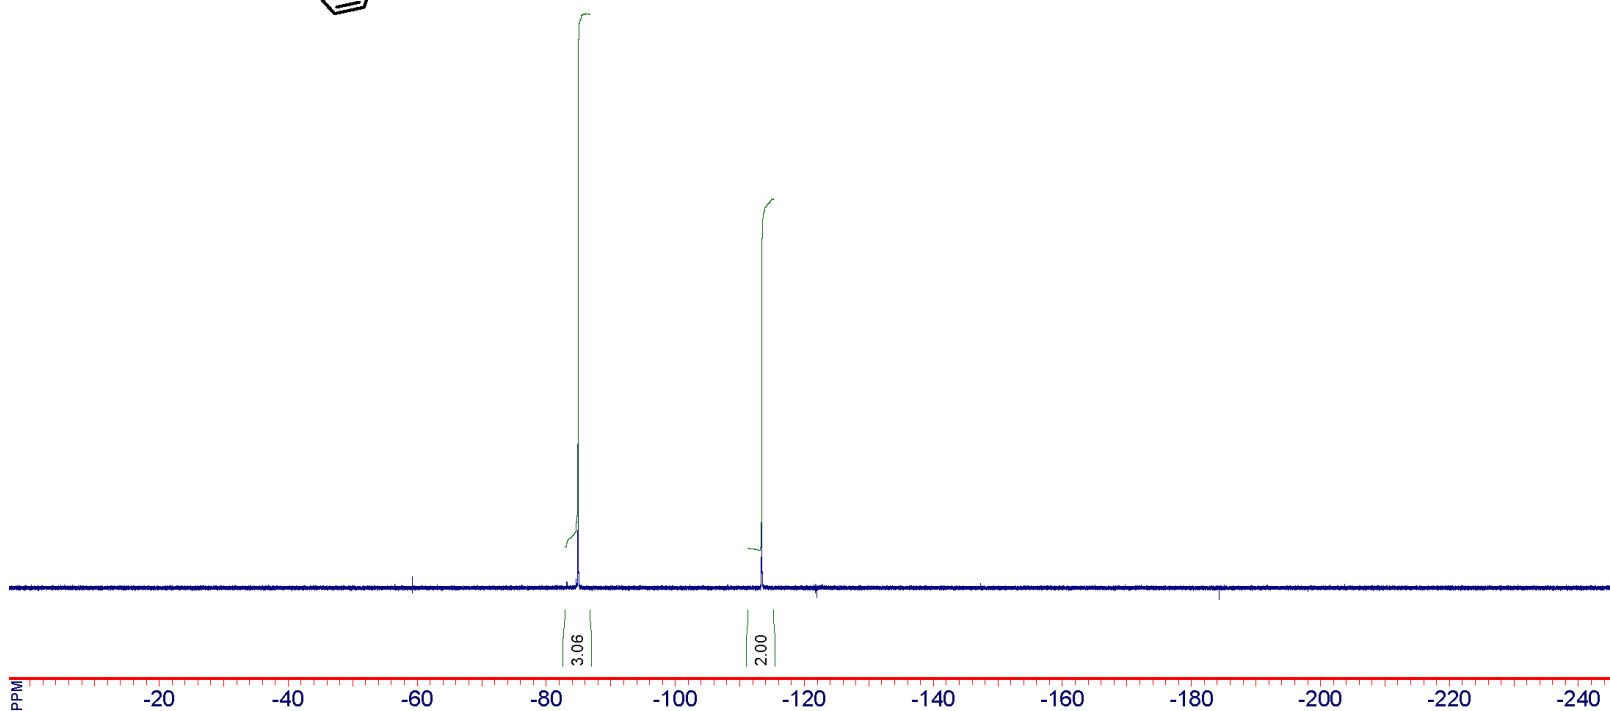

|                           |                |                  |           |                            |            |
|---------------------------|----------------|------------------|-----------|----------------------------|------------|
| File name: pkm105_F19.fid | Operator:      | SF: 376.3189 MHz | NSC: 0    | PW: 3.00 usec, RG: 16      | SI: 131072 |
| Date: 12-Nov-2013         | Solvent: cdcl3 | SW: 94118 Hz     | TE: 293 K | AQ: 0.68 sec, RD: 0.00 sec | □          |



# Compound 11a

pkm205

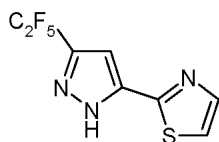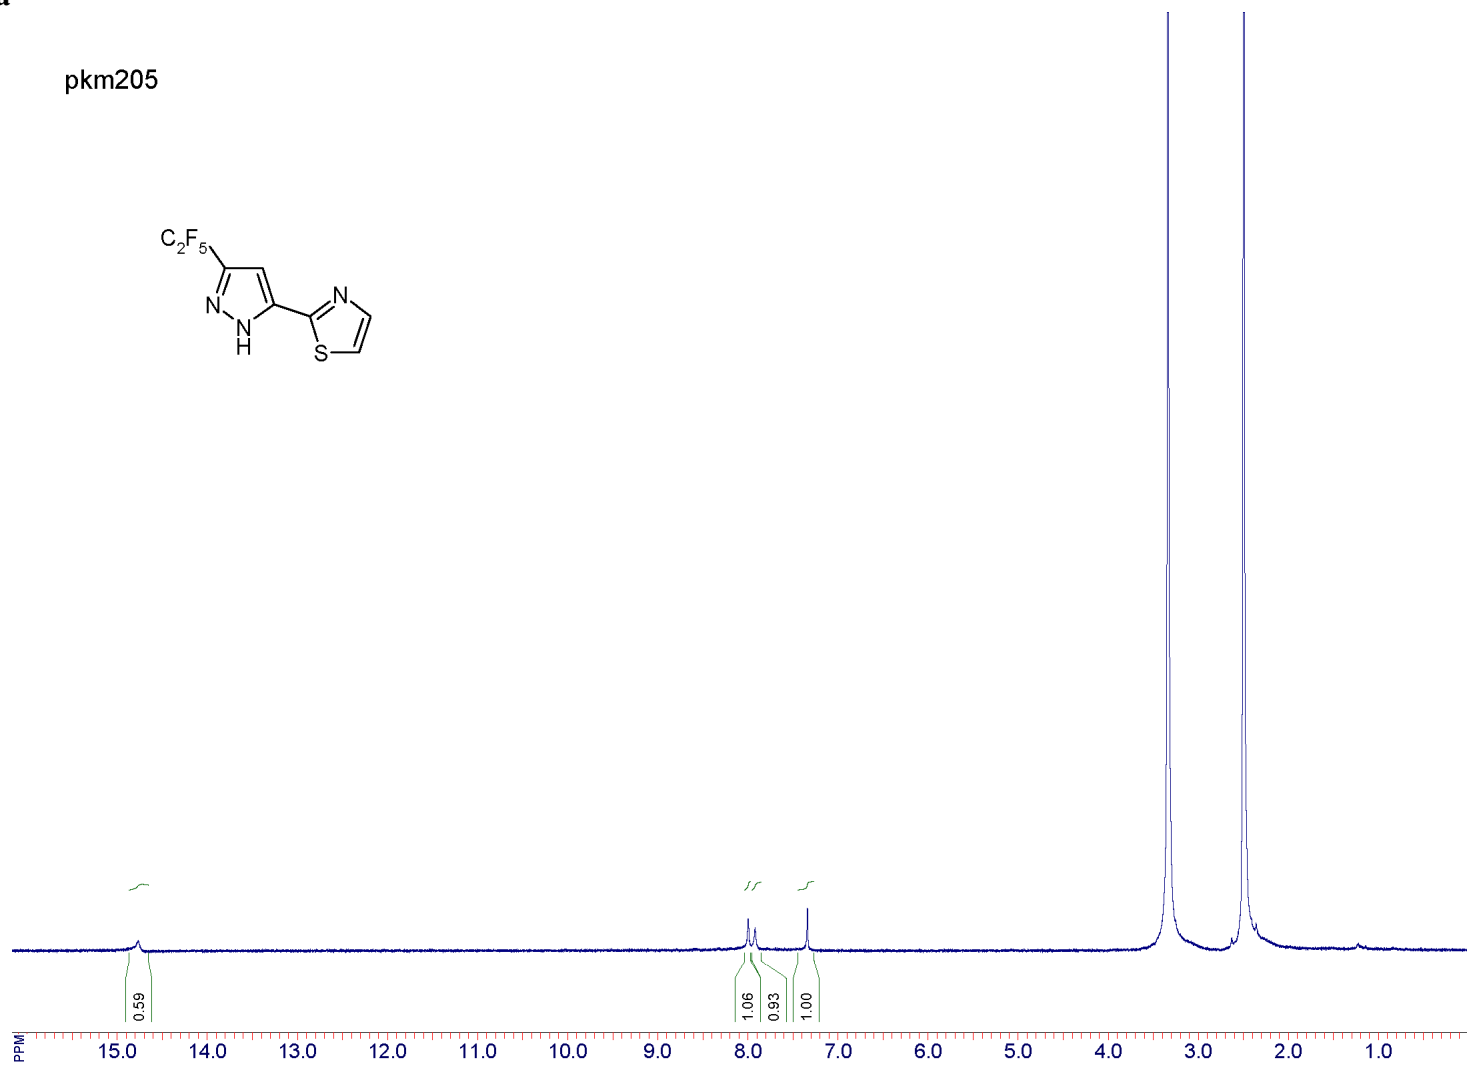

|                   |                |                  |         |                            |                                      |
|-------------------|----------------|------------------|---------|----------------------------|--------------------------------------|
| File name: pkm205 | Operator: root | SF: 499.9500 MHz | NSC: 1  | PW: 0.00 usec, RG: 250     | SI: 32768                            |
| Date: 14-May-2014 | Solvent: DMSO  | SW: 8993 Hz      | TE: 0 K | AQ: 1.82 sec, RD: 0.00 sec | Parameter file, XWIN-NMR Version 3.5 |

PPM

155.14  
143.77  
129.81  
128.63  
127.67  
125.95  
121.92  
104.41

pkm205-2 C13

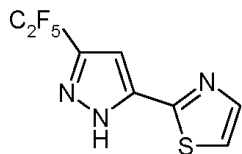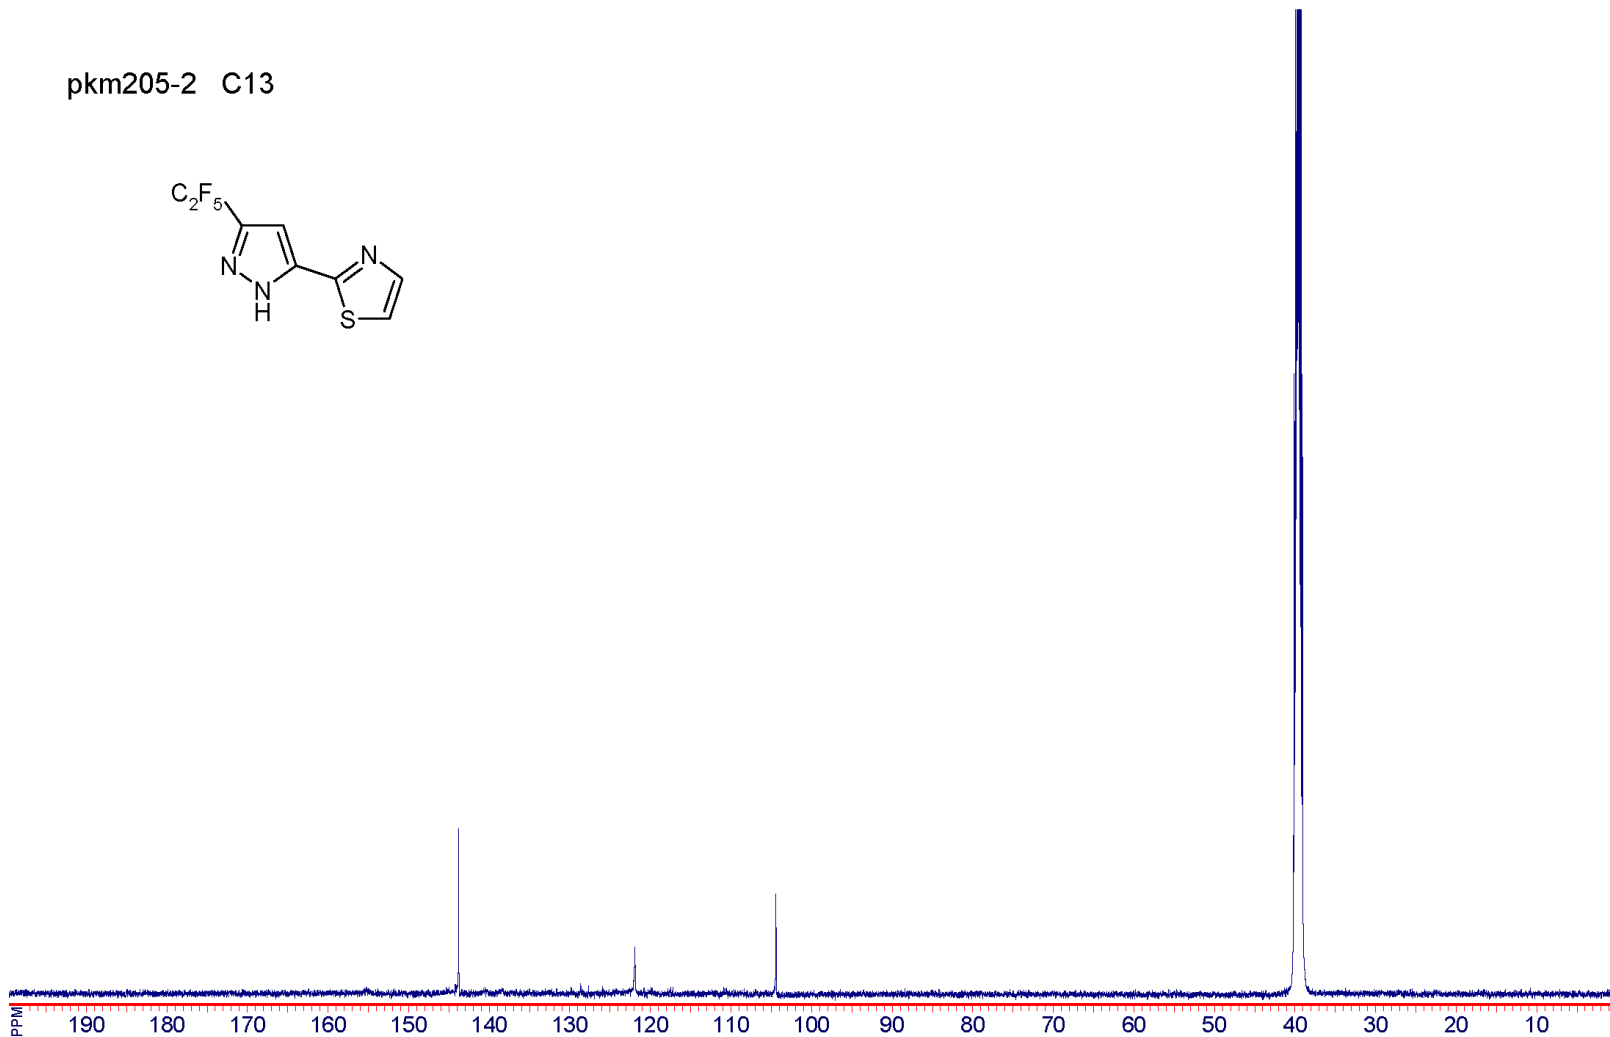

|                         |                |                  |            |                            |                                      |
|-------------------------|----------------|------------------|------------|----------------------------|--------------------------------------|
| File name: pkm205-2 C13 | Operator: root | SF: 125.7126 MHz | NSC: 10240 | PW: 0.00 usec, RG: 51200   | SI: 65536                            |
| Date: 17-May-2014       | Solvent: DMSO  | SW: 32680 Hz     | TE: 0 K    | AQ: 1.57 sec, RD: 0.00 sec | Parameter file, XWIN-NMR\Version 3.5 |

PPM

-83.78

-110.61

pkm213\_F19.fid

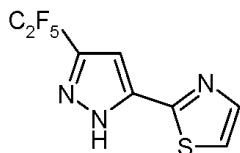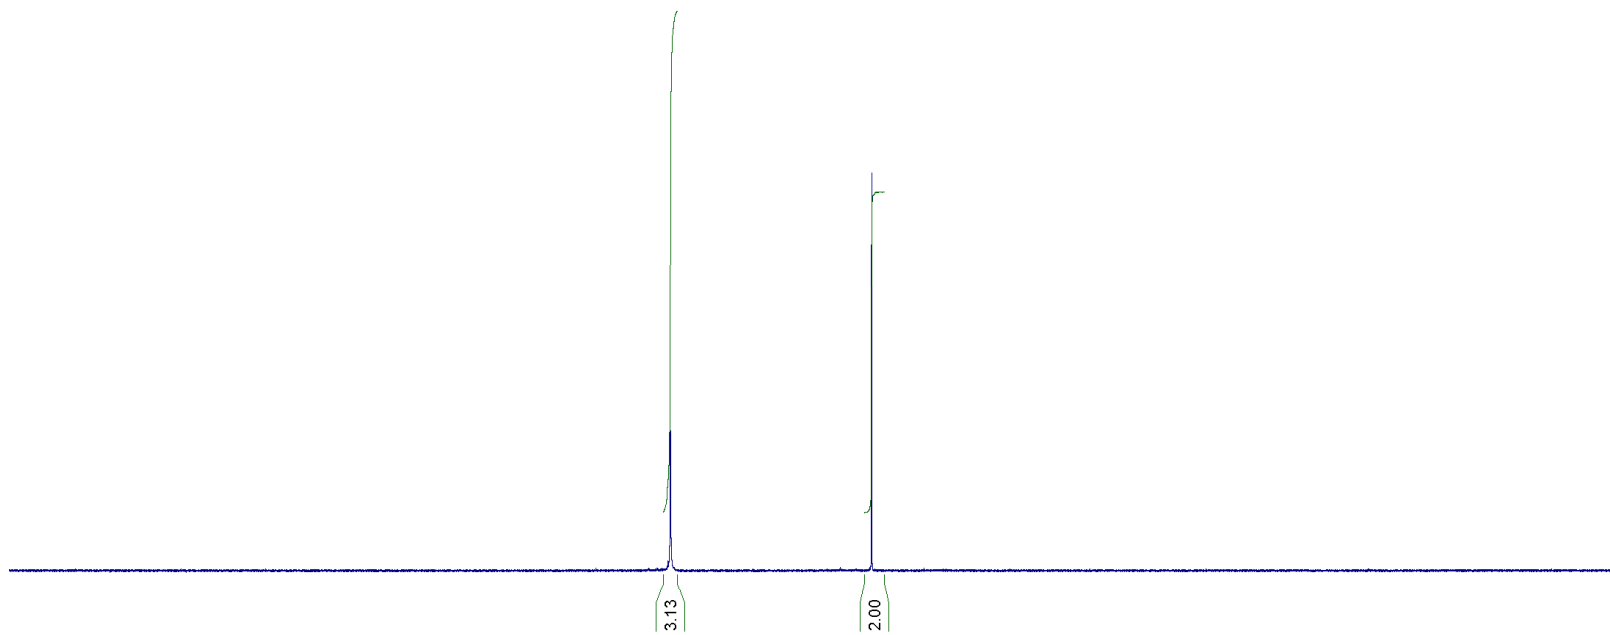

|                           |                   |                  |           |                            |           |
|---------------------------|-------------------|------------------|-----------|----------------------------|-----------|
| File name: pkm213_F19.fid | Operator:         | SF: 376.3274 MHz | NSC: 0    | PW: 3.00 usec, RG: 32      | SI: 65536 |
| Date: 22-May-2014         | Solvent: dmsol-d6 | SW: 82816 Hz     | TE: 293 K | AQ: 0.39 sec, RD: 0.00 sec | □         |

# Compound 12a

PPM

pkm202

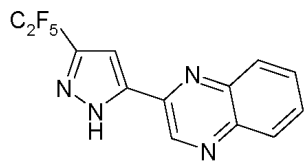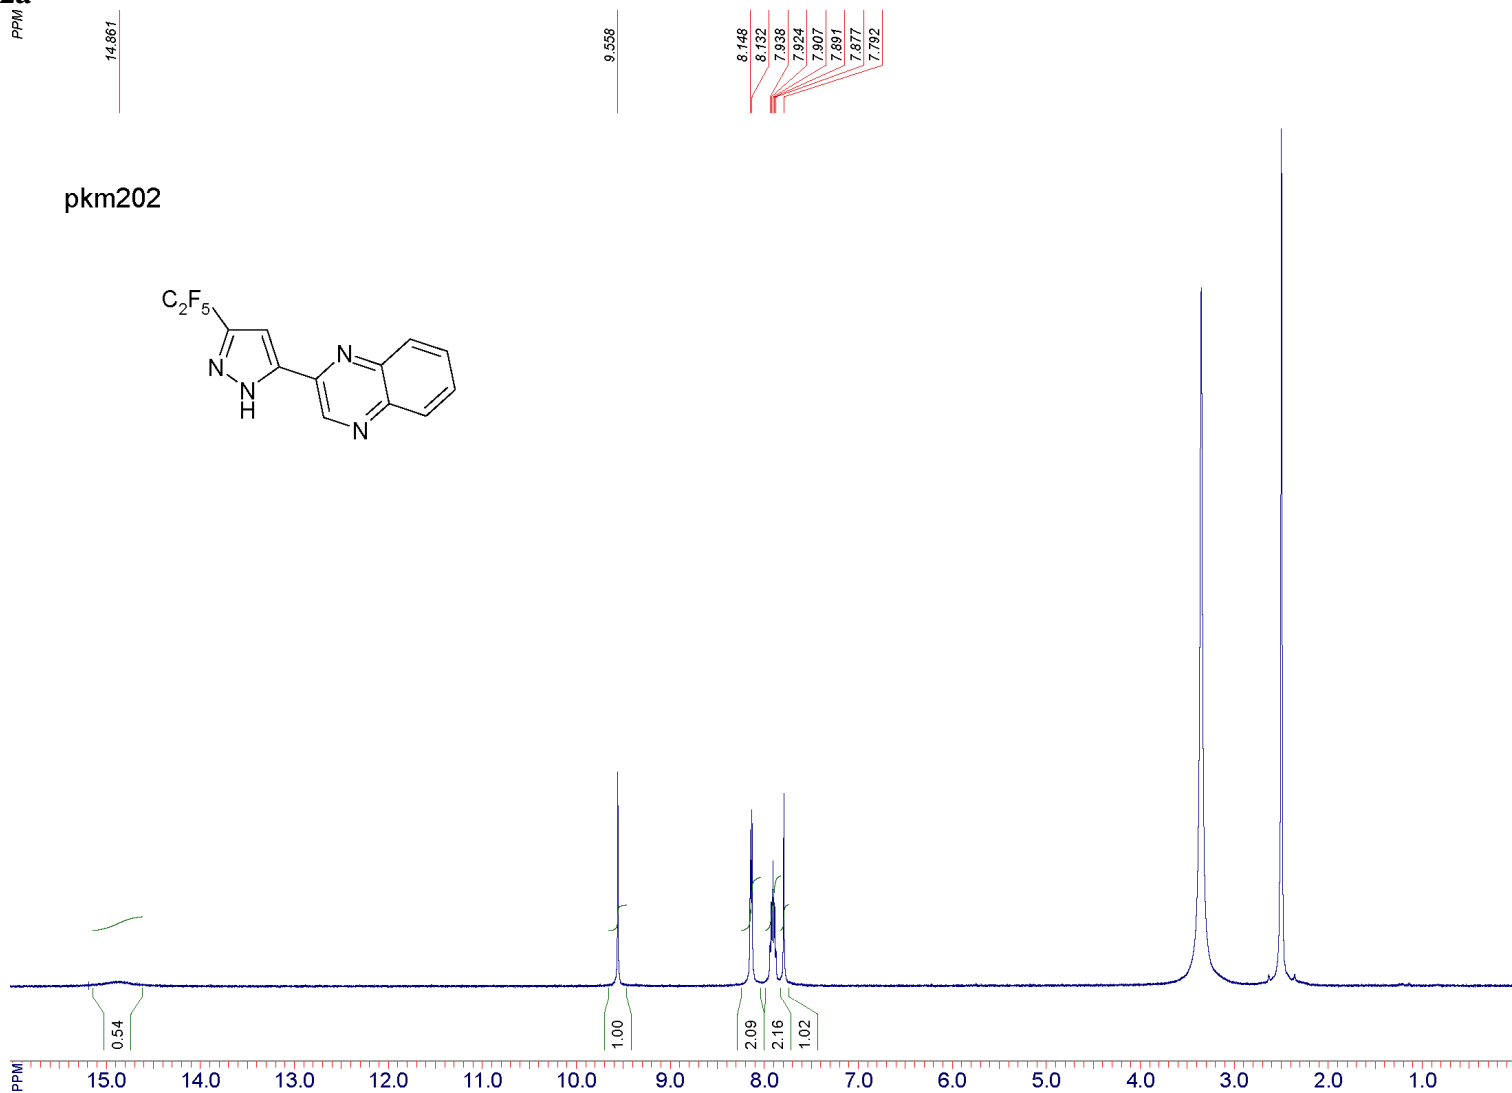

|                   |                |                  |         |                            |                          |
|-------------------|----------------|------------------|---------|----------------------------|--------------------------|
| File name: pkm202 | Operator: root | SF: 499.9500 MHz | NSC: 1  | PW: 0.00 usec, RG: 40      | SI: 32768                |
| Date: 12-May-2014 | Solvent: DMSO  | SW: 8993 Hz      | TE: 0 K | AQ: 1.82 sec, RD: 0.00 sec | Parameter file, XWIN-NMR |

PPM

142.53  
141.53  
141.07  
131.23  
130.62  
129.22  
128.94  
105.64

pkm202\_C13

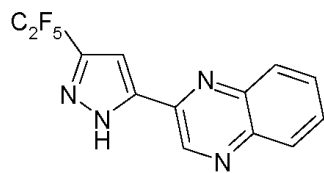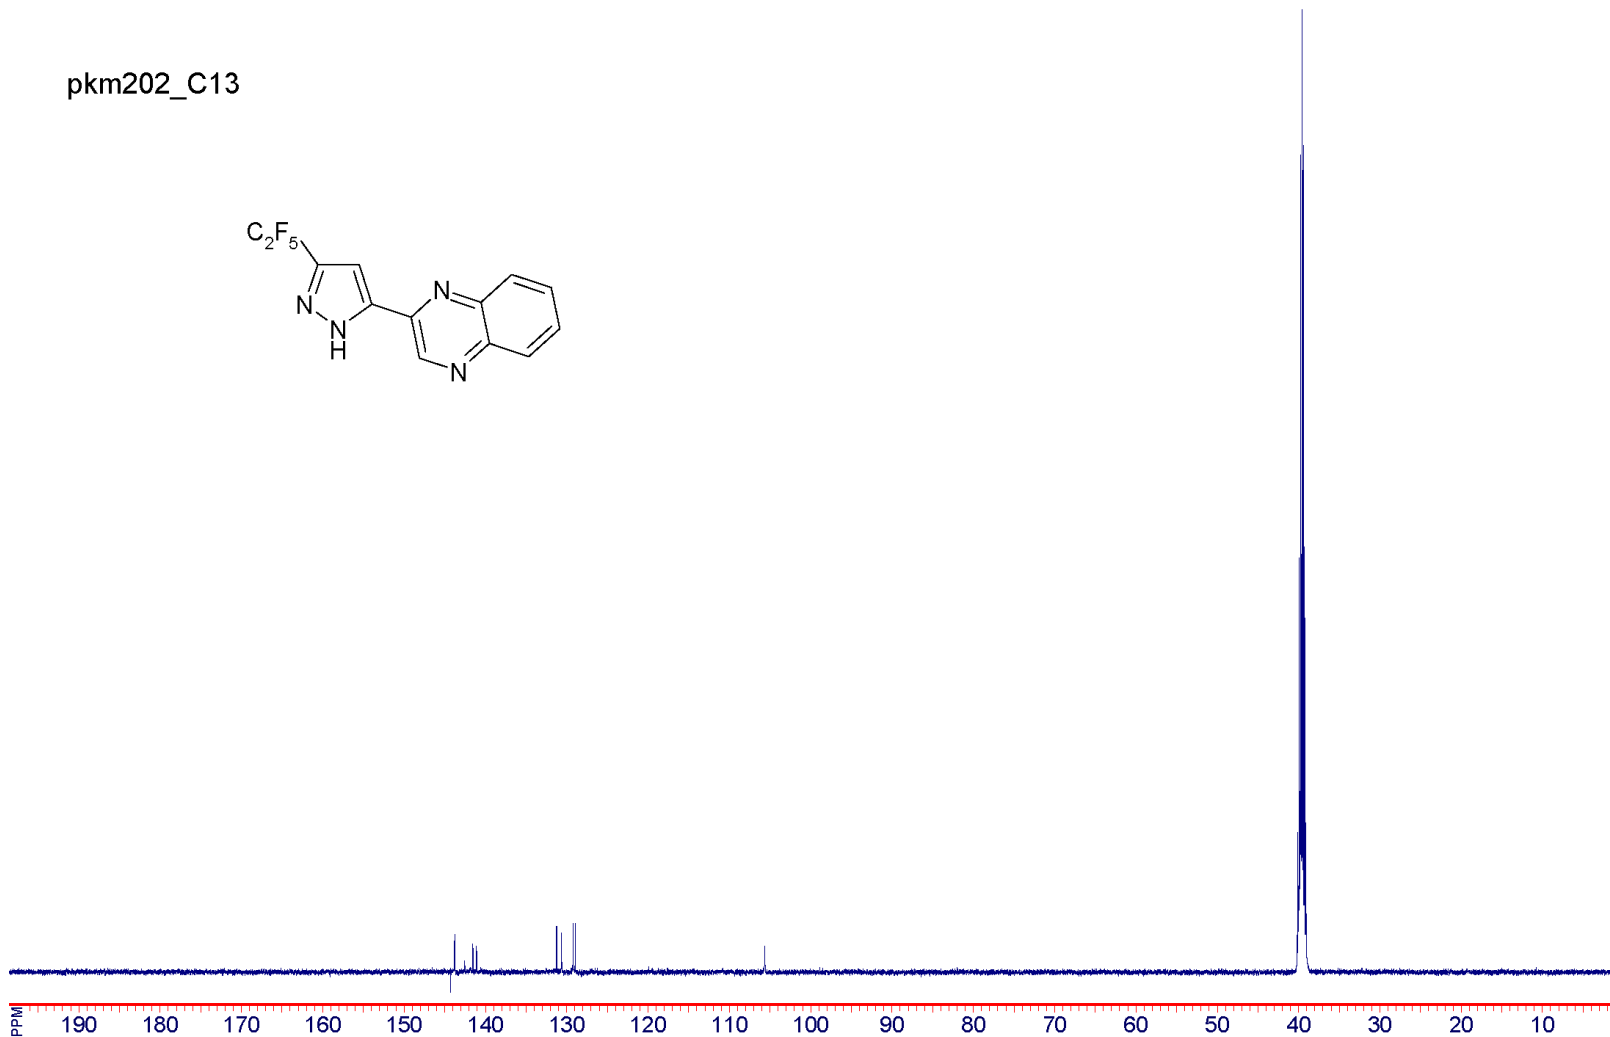

|                       |                |                  |           |                            |                                      |
|-----------------------|----------------|------------------|-----------|----------------------------|--------------------------------------|
| File name: pkm202_C13 | Operator: root | SF: 125.7126 MHz | NSC: 1364 | PW: 0.00 usec, RG: 51200   | SI: 65536                            |
| Date: 14-May-2014     | Solvent: DMSO  | SW: 32680 Hz     | TE: 0 K   | AQ: 1.57 sec, RD: 0.00 sec | Parameter file, XWIN-NMR Version 3.5 |

PPM

-83.10

-110.48

pkm202\_F19.fid

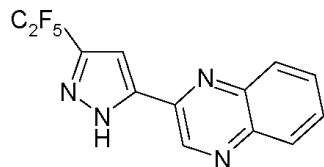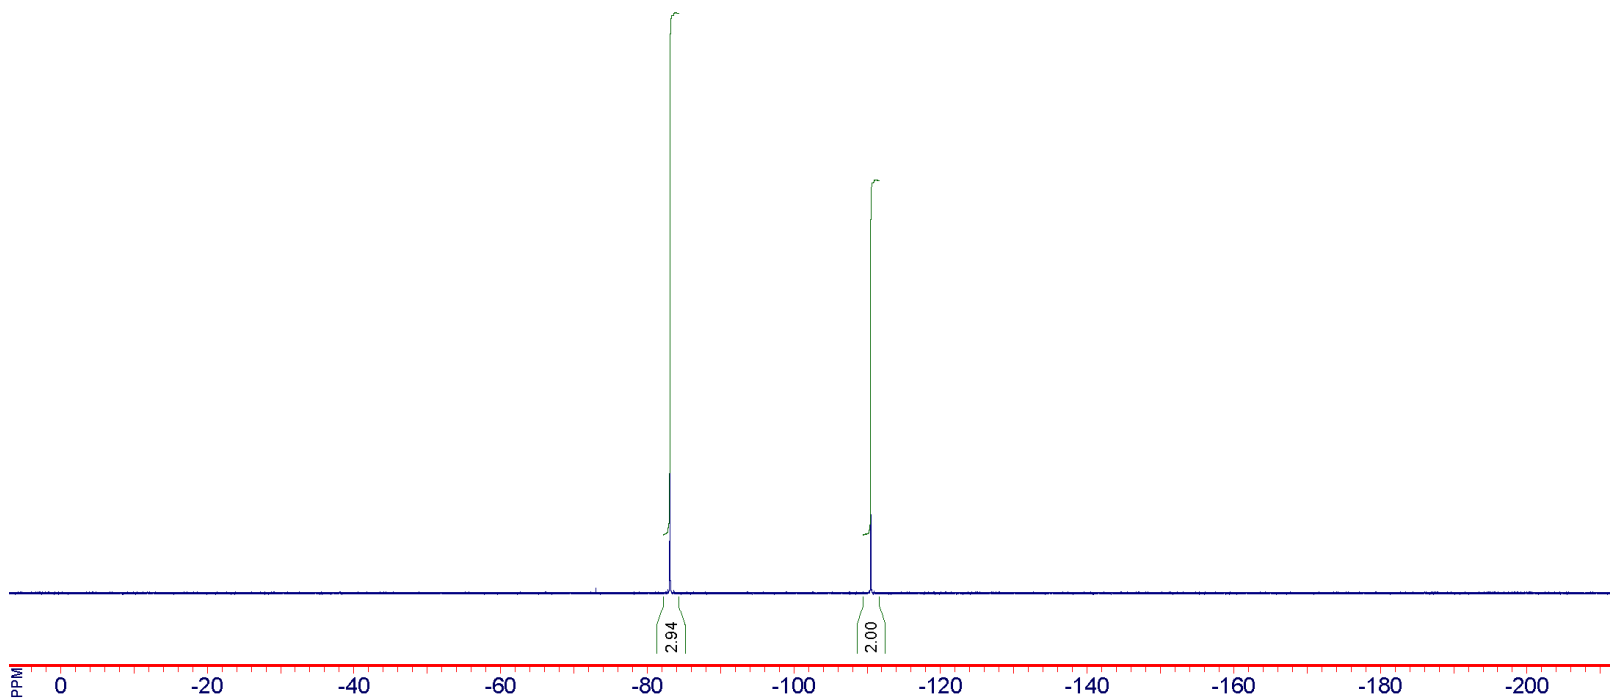

|                           |                   |                  |           |                            |           |
|---------------------------|-------------------|------------------|-----------|----------------------------|-----------|
| File name: pkm202_F19.fid | Operator:         | SF: 376.3274 MHz | NSC: 0    | PW: 3.00 usec, RG: 32      | SI: 65536 |
| Date: 20-May-2014         | Solvent: dmsso_d6 | SW: 82816 Hz     | TE: 293 K | AQ: 0.39 sec, RD: 0.00 sec | □         |

# Compound 15a

pkm-18

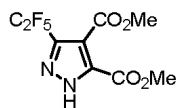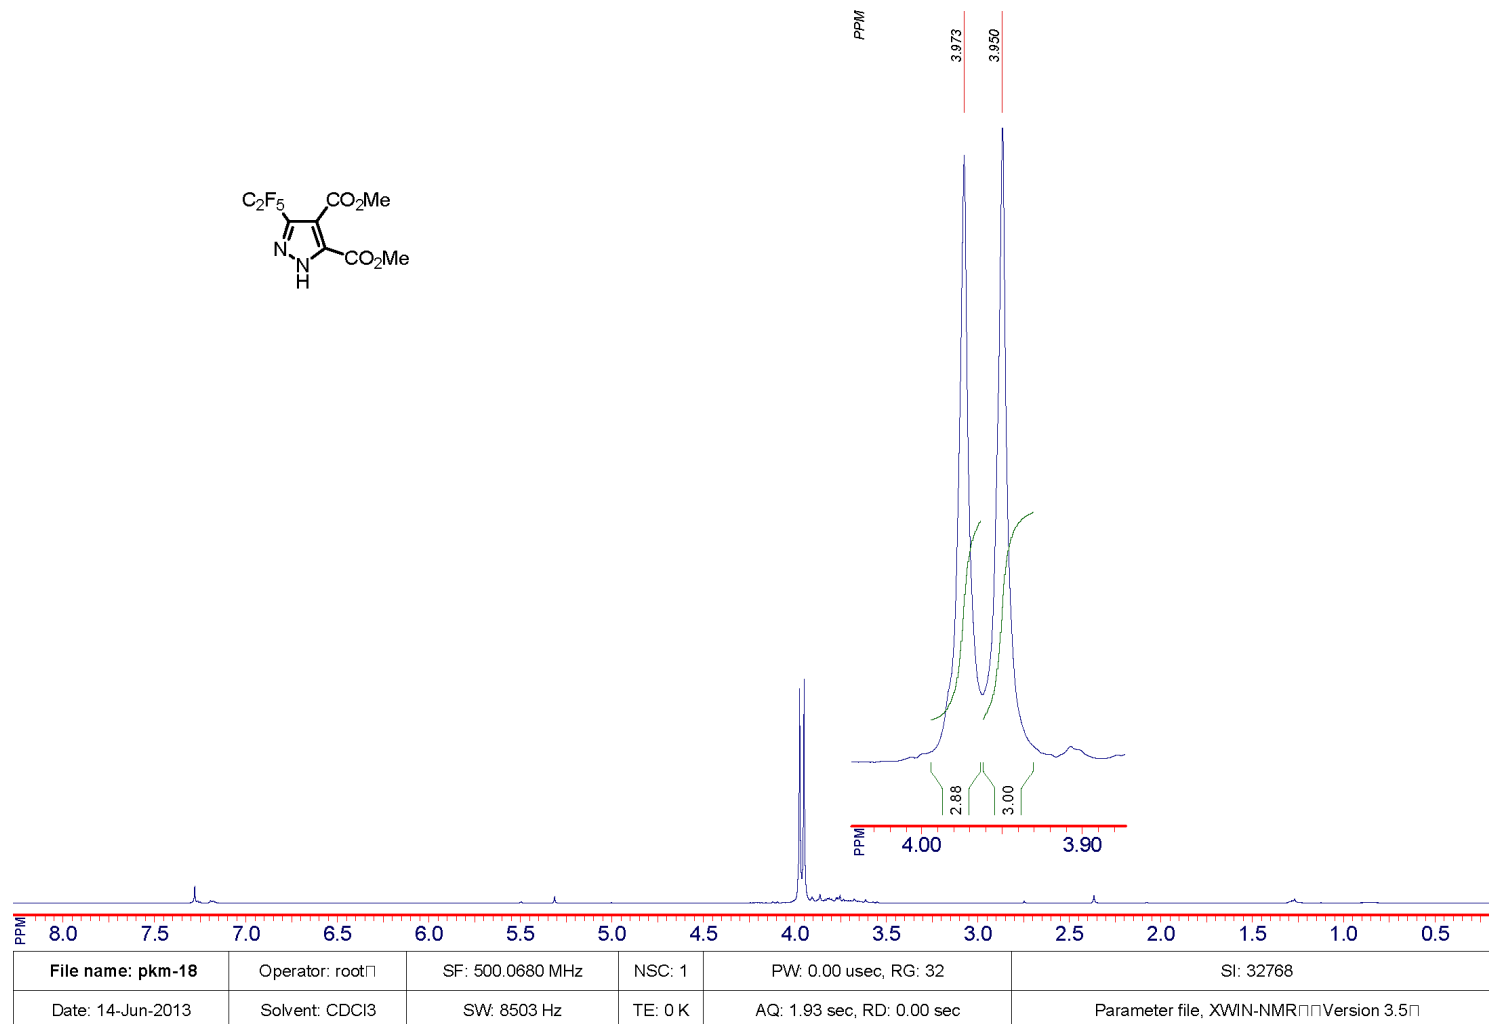

PPM

pkm18\_C13

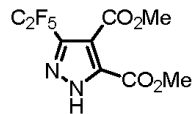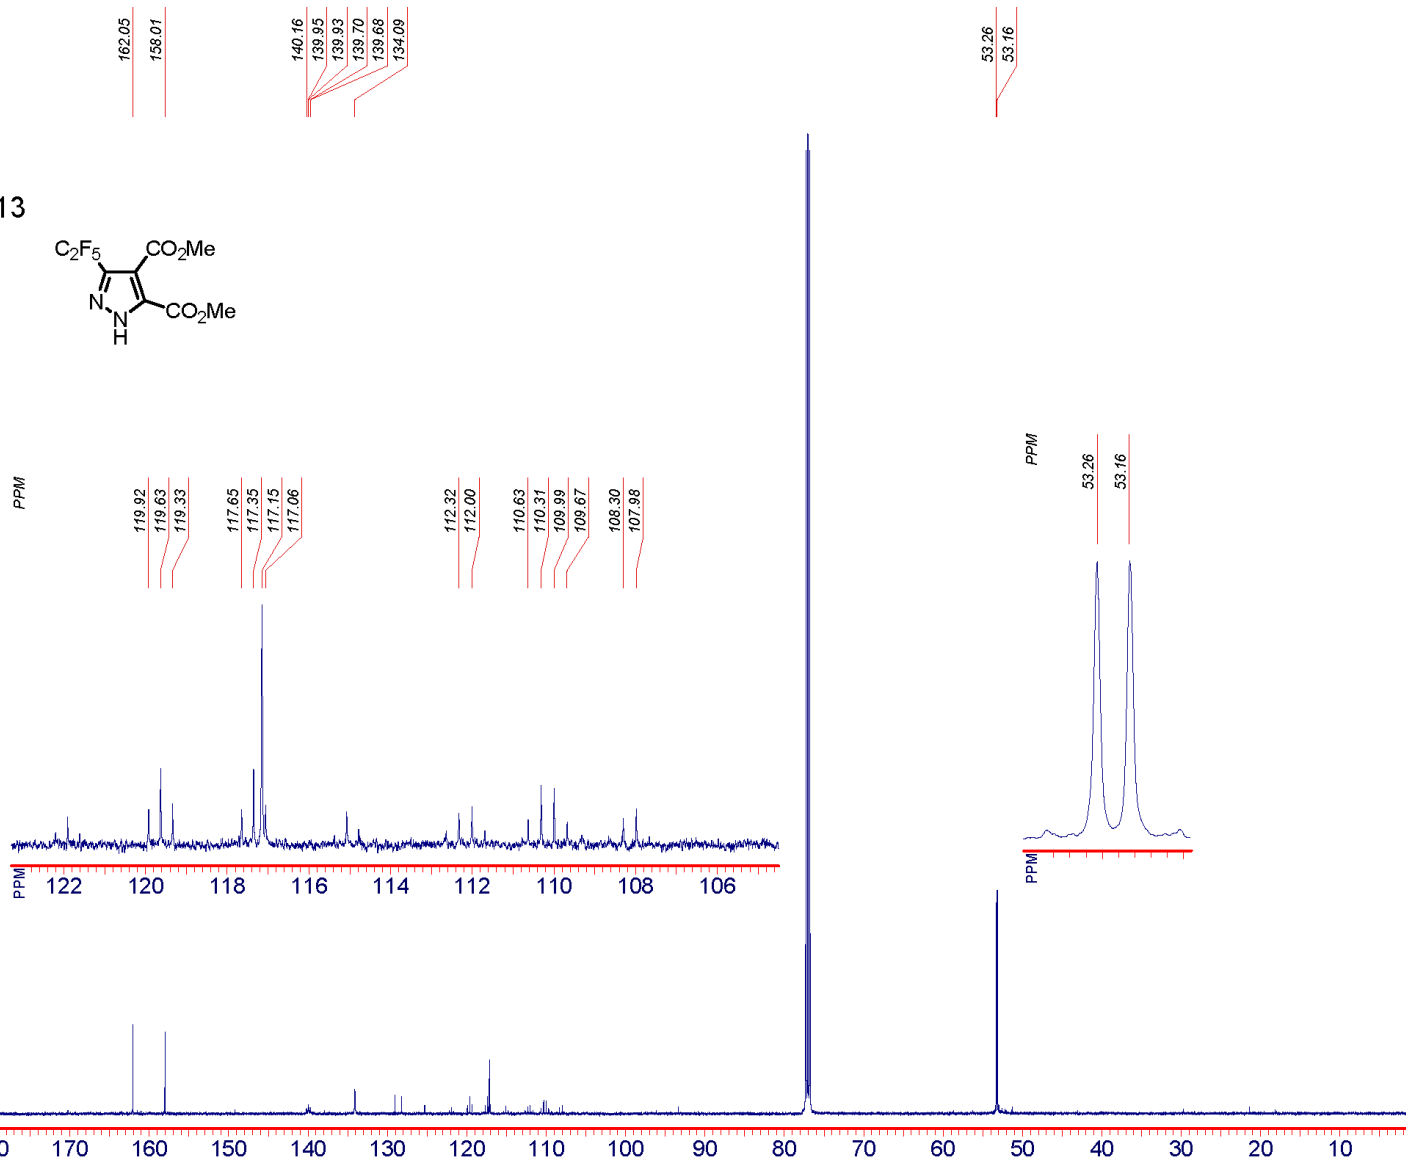

|                      |                |                  |            |                            |                                      |
|----------------------|----------------|------------------|------------|----------------------------|--------------------------------------|
| File name: pkm18_C13 | Operator: root | SF: 125.7422 MHz | NSC: 10240 | PW: 0.00 usec, RG: 51200   | SI: 65536                            |
| Date: 16-Jun-2013    | Solvent: CDCl3 | SW: 32680 Hz     | TE: 0 K    | AQ: 1.57 sec, RD: 0.00 sec | Parameter file, XWIN-NMR\Version 3.5 |



PPM

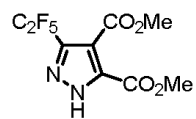

-84.32  
-84.32  
-84.33

-112.23  
-112.24

pkm-18\_F19.fid

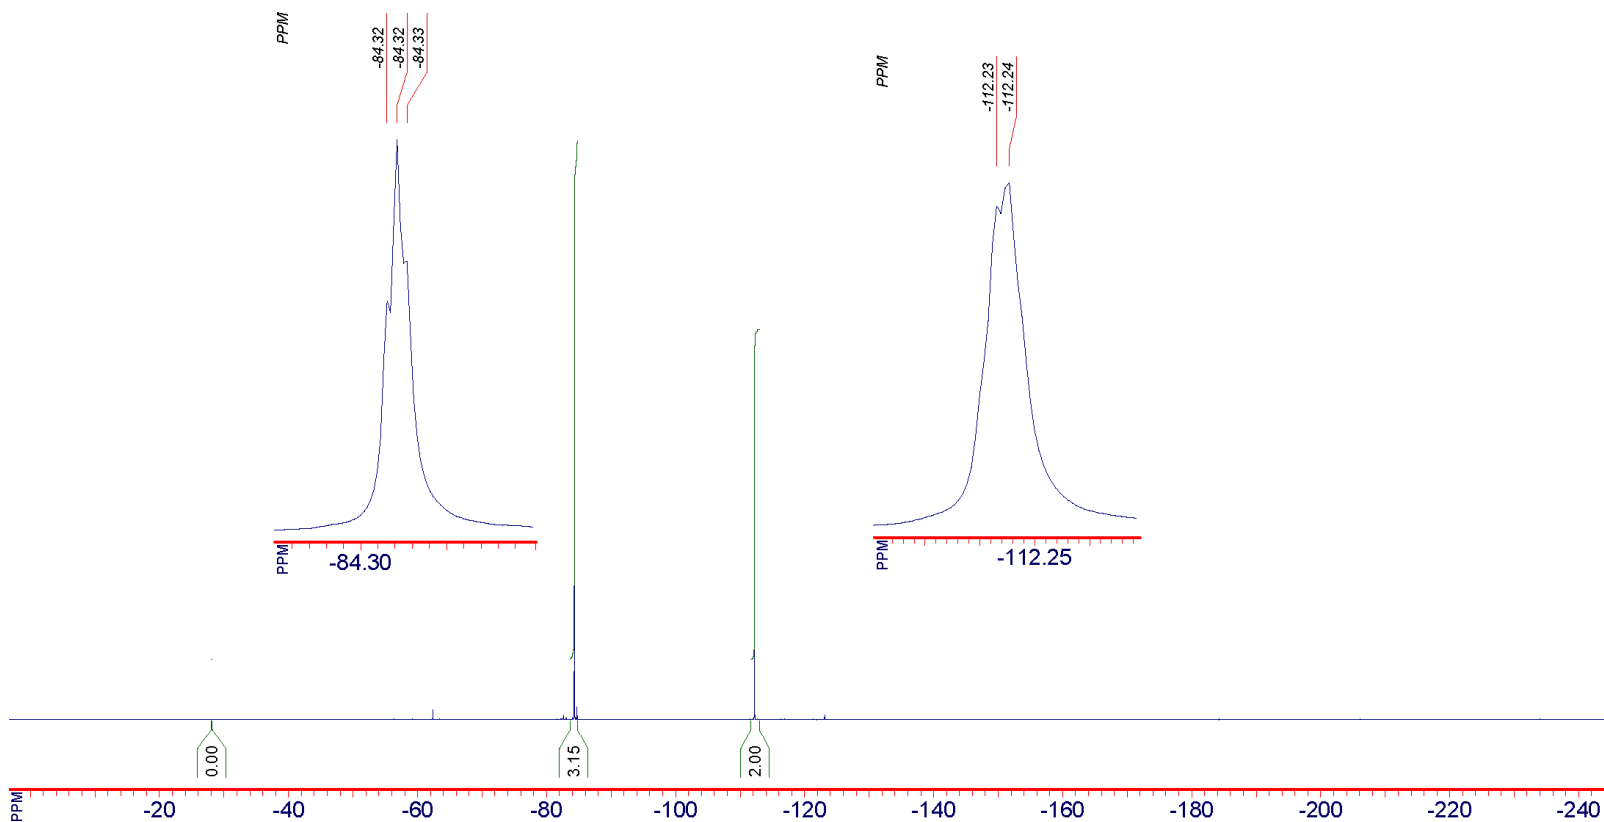

|                           |                |                  |           |                            |            |
|---------------------------|----------------|------------------|-----------|----------------------------|------------|
| File name: pkm-18_F19.fid | Operator:      | SF: 376.3207 MHz | NSC: 0    | PW: 3.00 usec, RG: 16      | SI: 131072 |
| Date: 18-Jun-2013         | Solvent: cdcl3 | SW: 94118 Hz     | TE: 293 K | AQ: 0.68 sec, RD: 0.00 sec | □          |

# Compound 16a

PPM

12.063

4.414

1.375

pkm92

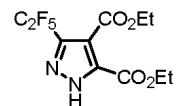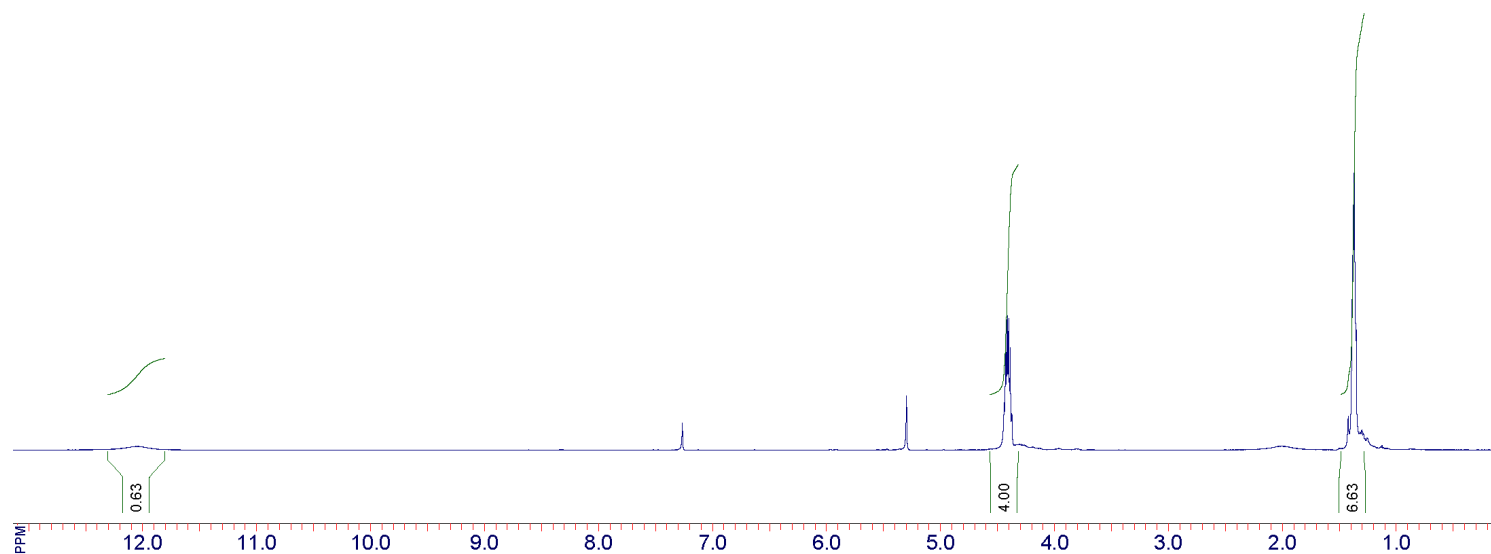

|                   |                |                  |         |                            |                                      |
|-------------------|----------------|------------------|---------|----------------------------|--------------------------------------|
| File name: pkm92  | Operator: root | SF: 499.9500 MHz | NSC: 1  | PW: 0.00 usec, RG: 24      | SI: 32768                            |
| Date: 21-Oct-2013 | Solvent: CDCl3 | SW: 8993 Hz      | TE: 0 K | AQ: 1.82 sec, RD: 0.00 sec | Parameter file, XWIN-NMR Version 3.5 |

PPM

pkm92\_C13

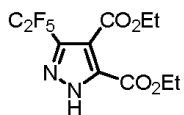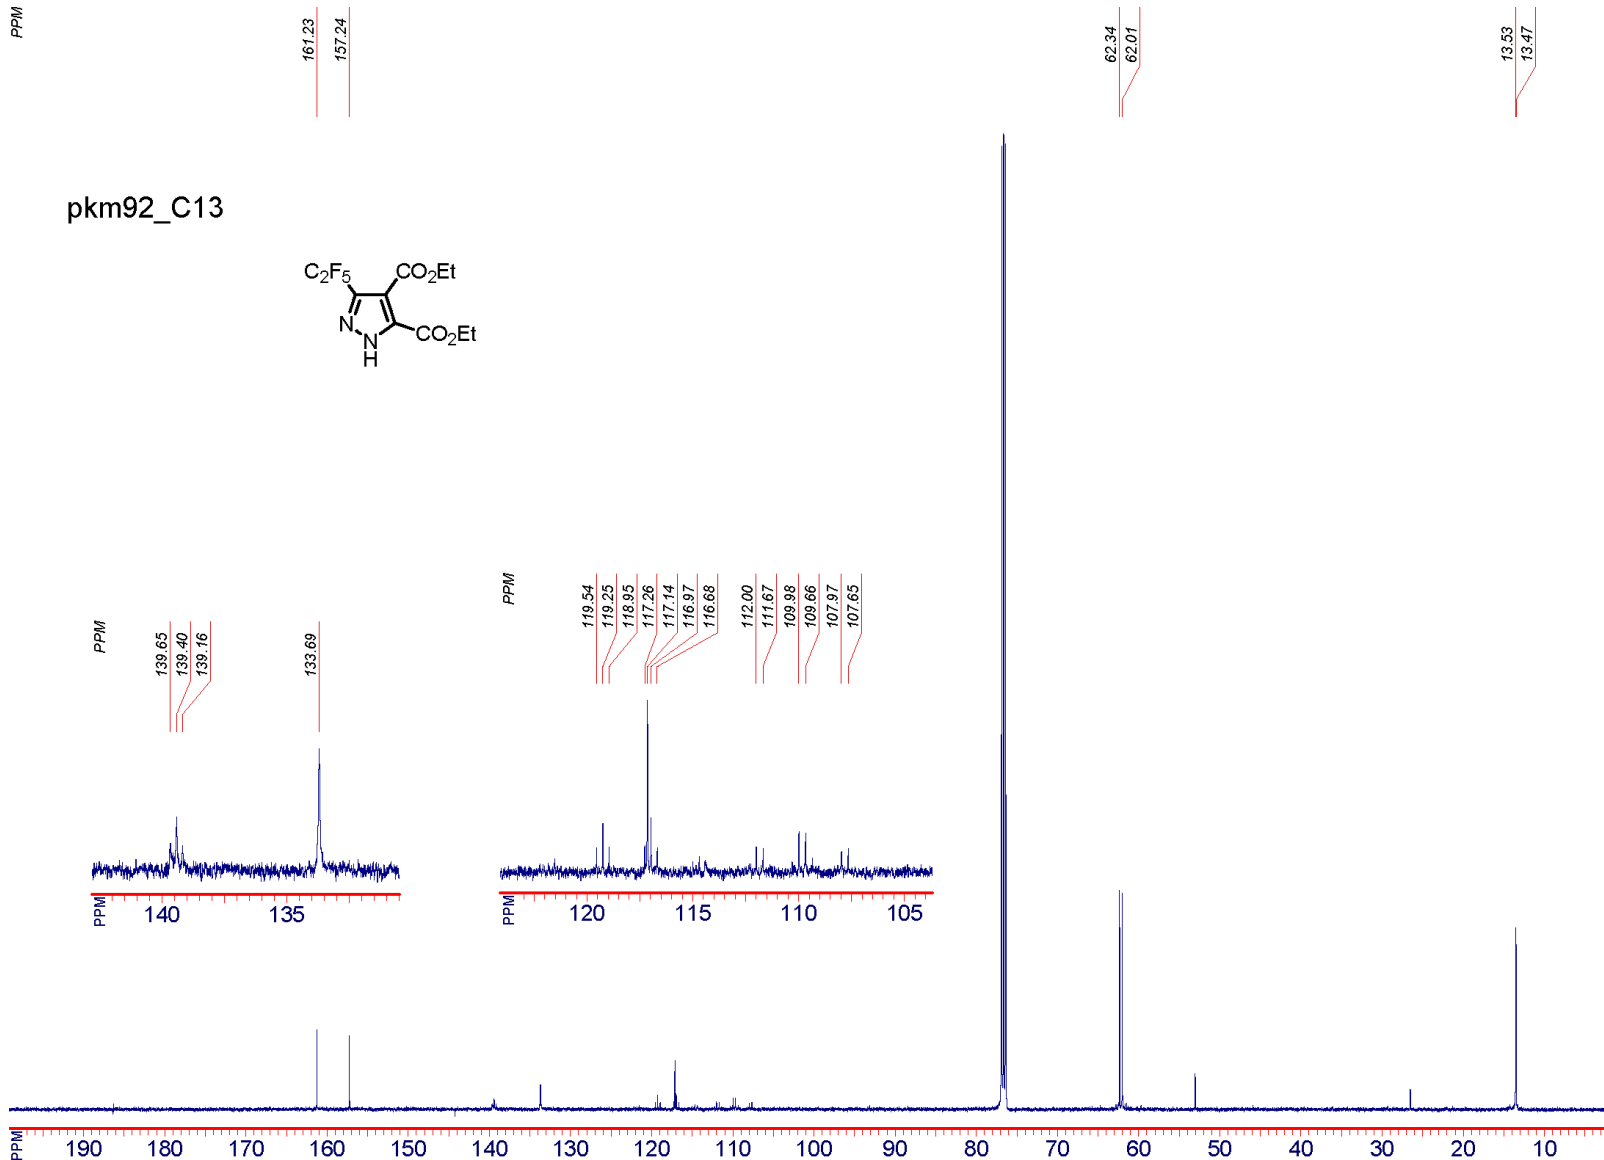

|                      |                |                  |           |                            |                                      |
|----------------------|----------------|------------------|-----------|----------------------------|--------------------------------------|
| File name: pkm92_C13 | Operator: root | SF: 125.7126 MHz | NSC: 5120 | PW: 0.00 usec, RG: 51200   | SI: 65536                            |
| Date: 25-Oct-2013    | Solvent: CDCl3 | SW: 32680 Hz     | TE: 0 K   | AQ: 1.57 sec, RD: 0.00 sec | Parameter file, XWIN-NMR Version 3.5 |

PPM

-84.34

-112.19

pkm92\_F19.fid

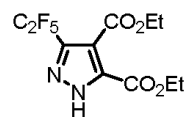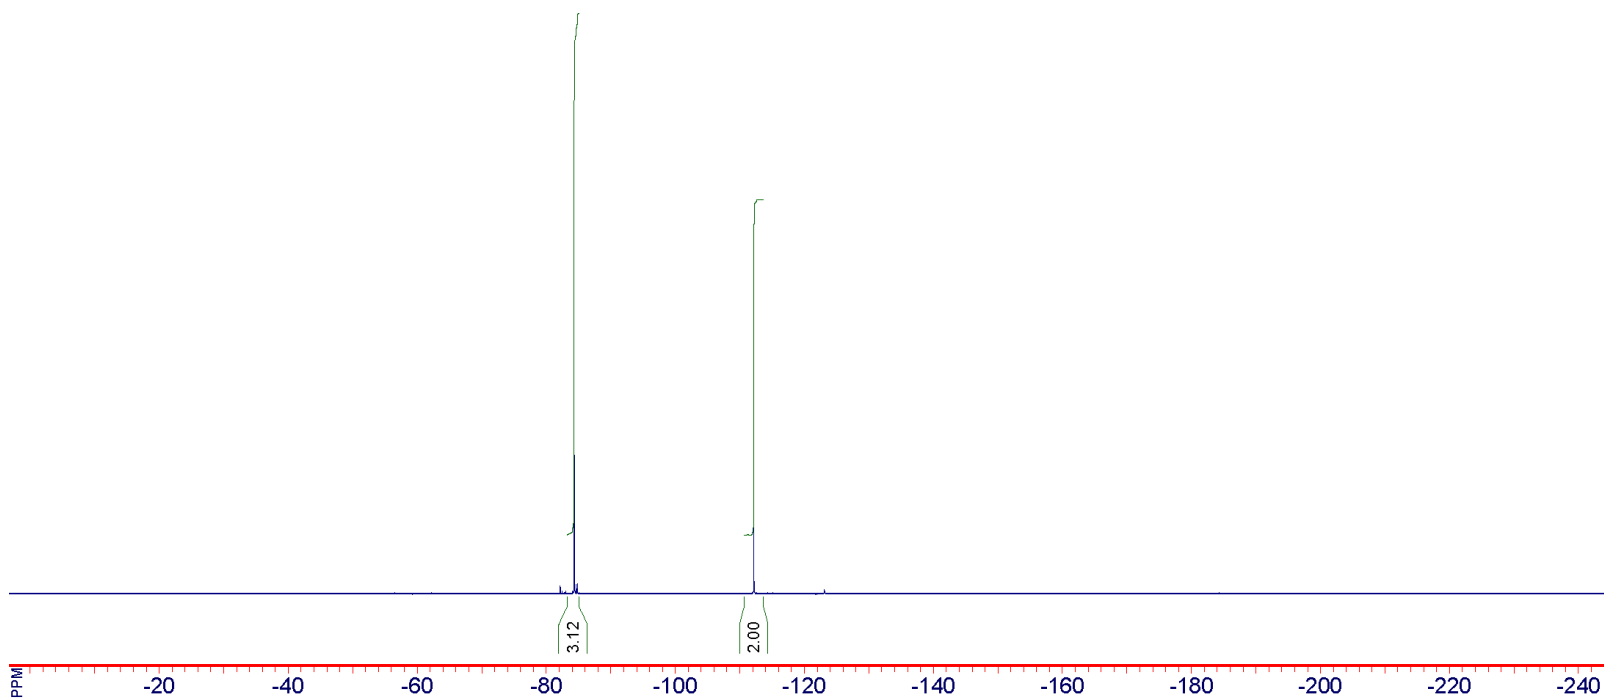

|                          |                |                  |           |                            |            |
|--------------------------|----------------|------------------|-----------|----------------------------|------------|
| File name: pkm92_F19.fid | Operator:      | SF: 376.3189 MHz | NSC: 0    | PW: 3.00 usec, RG: 16      | SI: 131072 |
| Date: 29-Oct-2013        | Solvent: cdcl3 | SW: 94118 Hz     | TE: 293 K | AQ: 0.68 sec, RD: 0.00 sec | □          |

# Compound 17a

pkm217\_C13

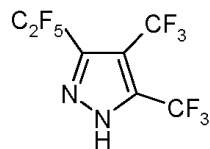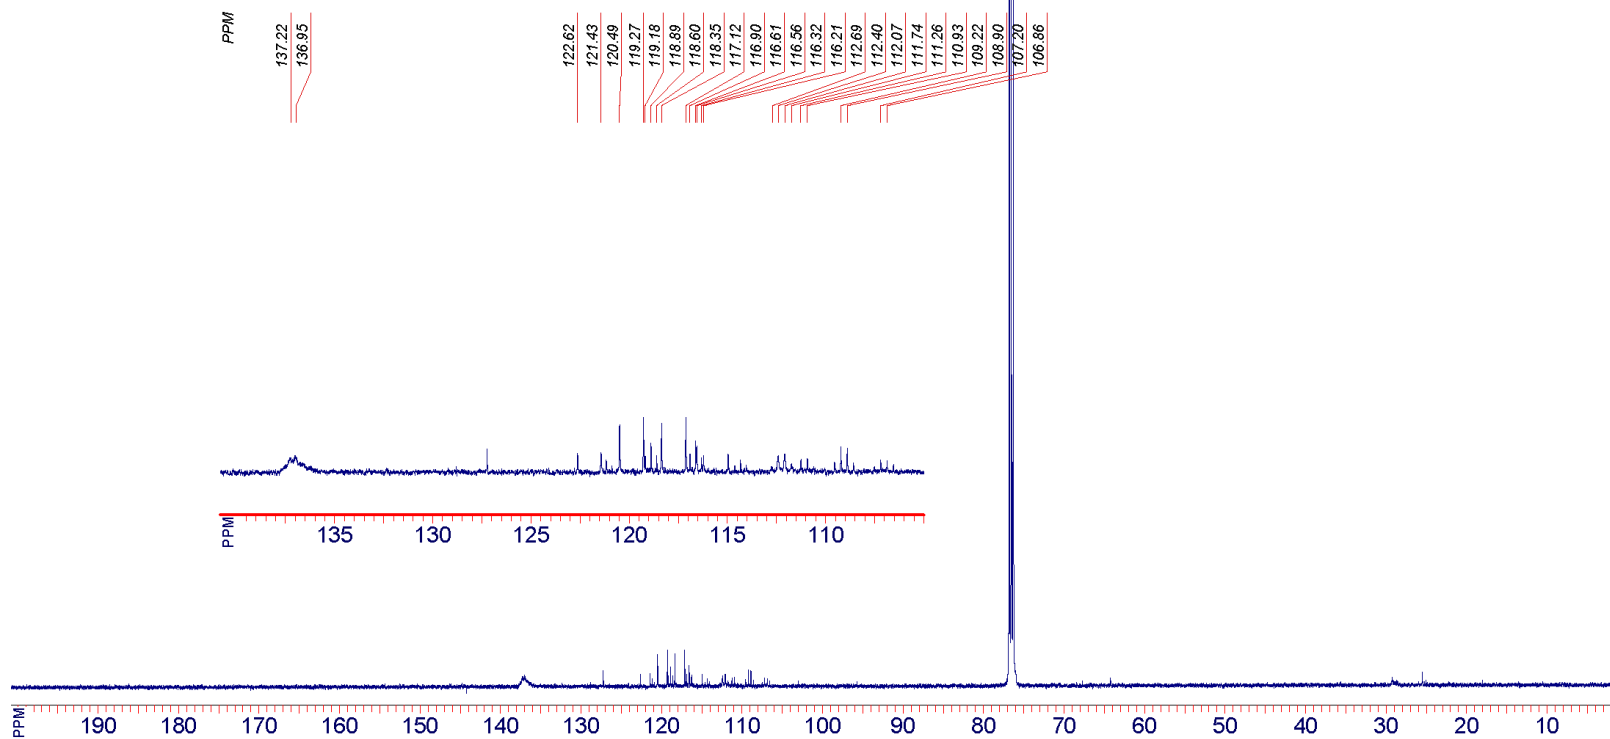

|                       |                |                  |            |                            |                                      |
|-----------------------|----------------|------------------|------------|----------------------------|--------------------------------------|
| File name: pkm217_C13 | Operator: root | SF: 125.7126 MHz | NSC: 10240 | PW: 0.00 usec, RG: 51200   | SI: 65536                            |
| Date: 25-May-2014     | Solvent: dms0  | SW: 32680 Hz     | TE: 0 K    | AQ: 1.57 sec, RD: 0.00 sec | Parameter file, XWIN-NMR\Version 3.5 |

PPM

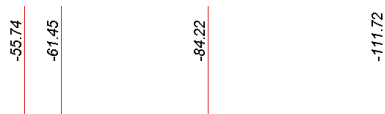

pkm217\_F19.fid

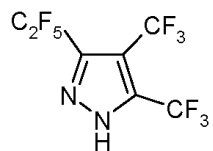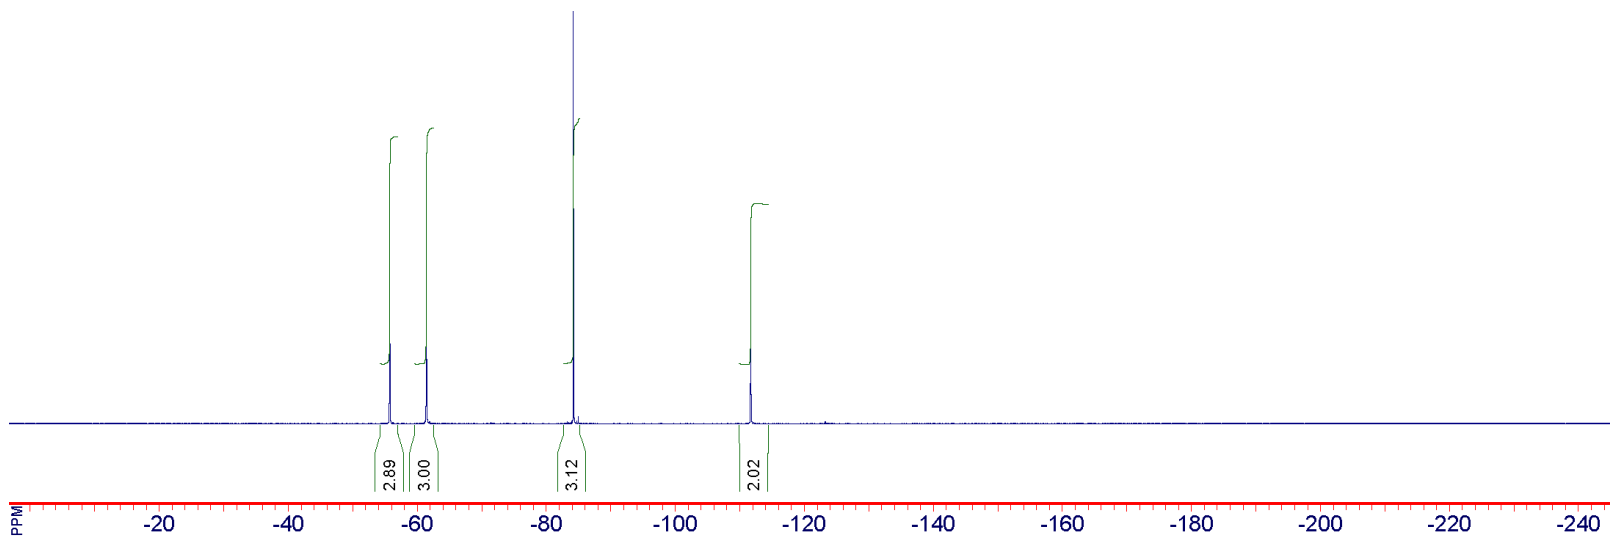

|                           |                |                  |           |                            |           |
|---------------------------|----------------|------------------|-----------|----------------------------|-----------|
| File name: pkm217_F19.fid | Operator:      | SF: 376.3189 MHz | NSC: 0    | PW: 3.00 usec, RG: 32      | SI: 65536 |
| Date: 27-May-2014         | Solvent: cdcl3 | SW: 94118 Hz     | TE: 293 K | AQ: 0.34 sec, RD: 0.00 sec | □         |

# Compound 18a/18b

PPM

pkm113

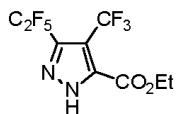

+

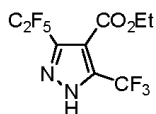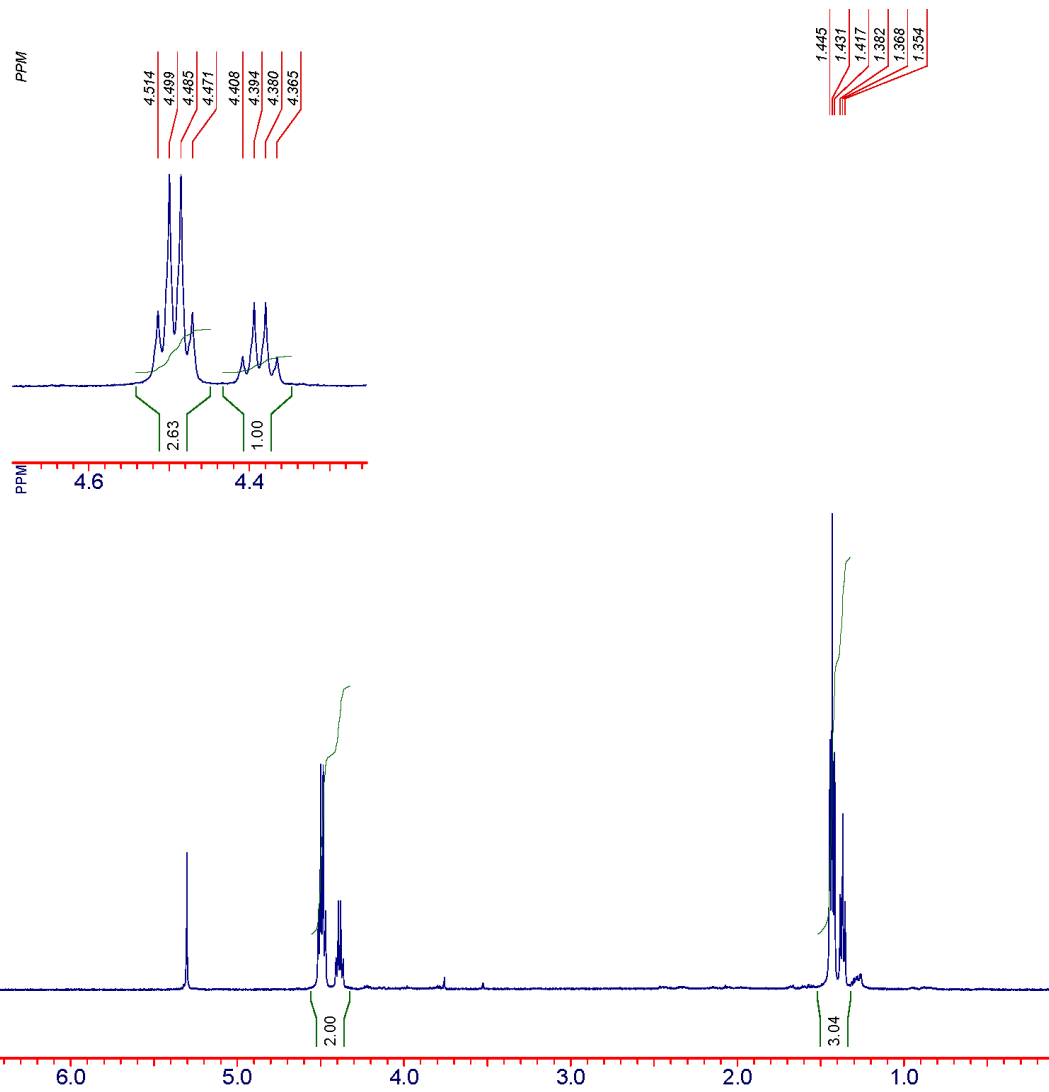

|                   |                |                  |         |                            |                                     |
|-------------------|----------------|------------------|---------|----------------------------|-------------------------------------|
| File name: pkm113 | Operator: root | SF: 499.9500 MHz | NSC: 1  | PW: 0.00 usec, RG: 100     | SI: 32768                           |
| Date: 21-Nov-2013 | Solvent: CDCl3 | SW: 8993 Hz      | TE: 0 K | AQ: 1.82 sec, RD: 0.00 sec | Parameter file, XWIN-NMRVersion 3.5 |

PPM

158.91  
156.6962.91  
61.7613.40  
13.26

pkm-113\_C13

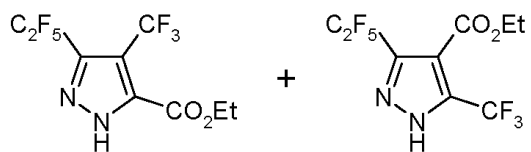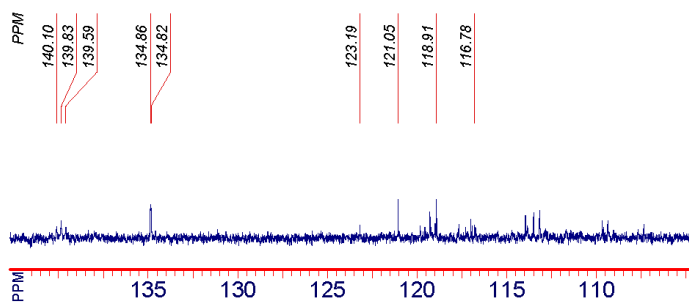123.19  
121.05  
118.91  
116.78

PPM 190 180 170 160 150 140 130 120 110 100 90 80 70 60 50 40 30 20 10

|                        |                |                  |           |                            |                                      |
|------------------------|----------------|------------------|-----------|----------------------------|--------------------------------------|
| File name: pkm-113_C13 | Operator: root | SF: 125.7126 MHz | NSC: 5120 | PW: 0.00 usec, RG: 51200   | SI: 65536                            |
| Date: 06-Dec-2013      | Solvent: CDCl3 | SW: 32680 Hz     | TE: 0 K   | AQ: 1.57 sec, RD: 0.00 sec | Parameter file, XWIN-NMR Version 3.5 |



PPM

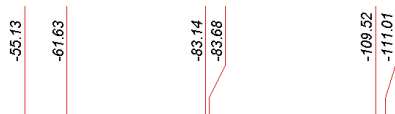

pokm113\_F19.fid

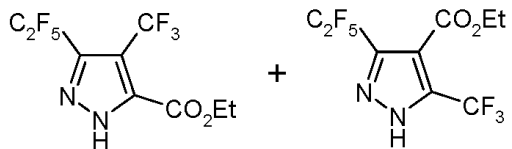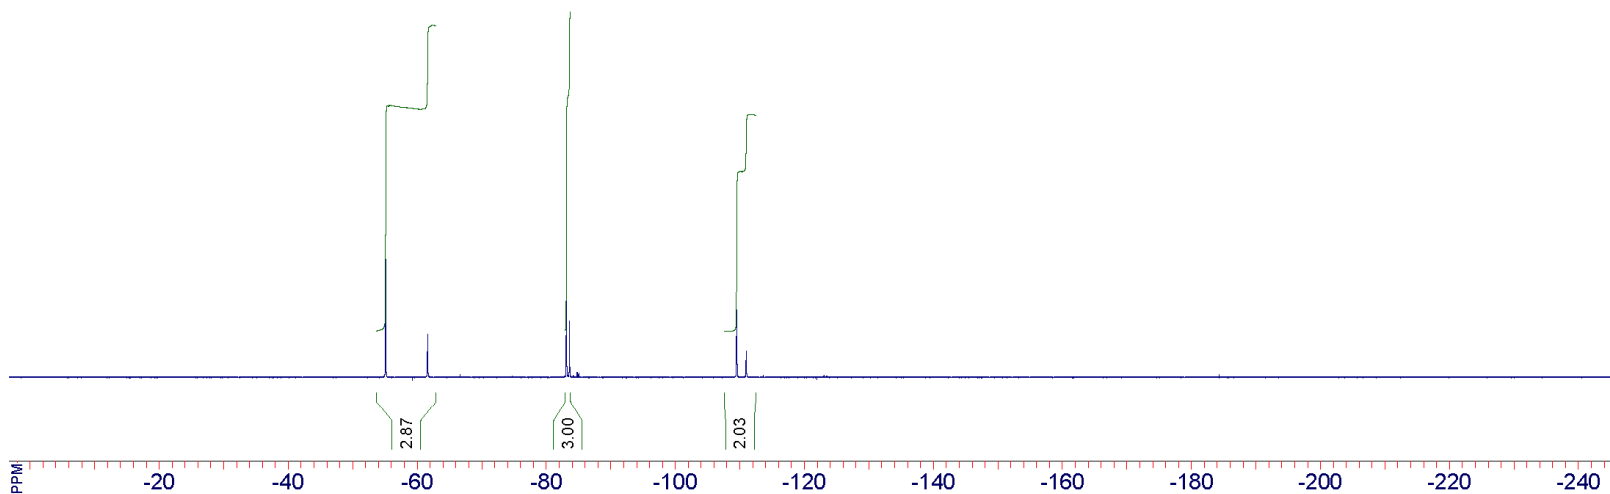

|                            |                |                  |           |                            |            |
|----------------------------|----------------|------------------|-----------|----------------------------|------------|
| File name: pokm113_F19.fid | Operator:      | SF: 376.3189 MHz | NSC: 0    | PW: 3.00 usec, RG: 16      | SI: 131072 |
| Date: 10-Dec-2013          | Solvent: cdcl3 | SW: 94118 Hz     | TE: 293 K | AQ: 0.68 sec, RD: 0.00 sec | □          |

# Compound 19b

PPM

pkm75

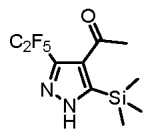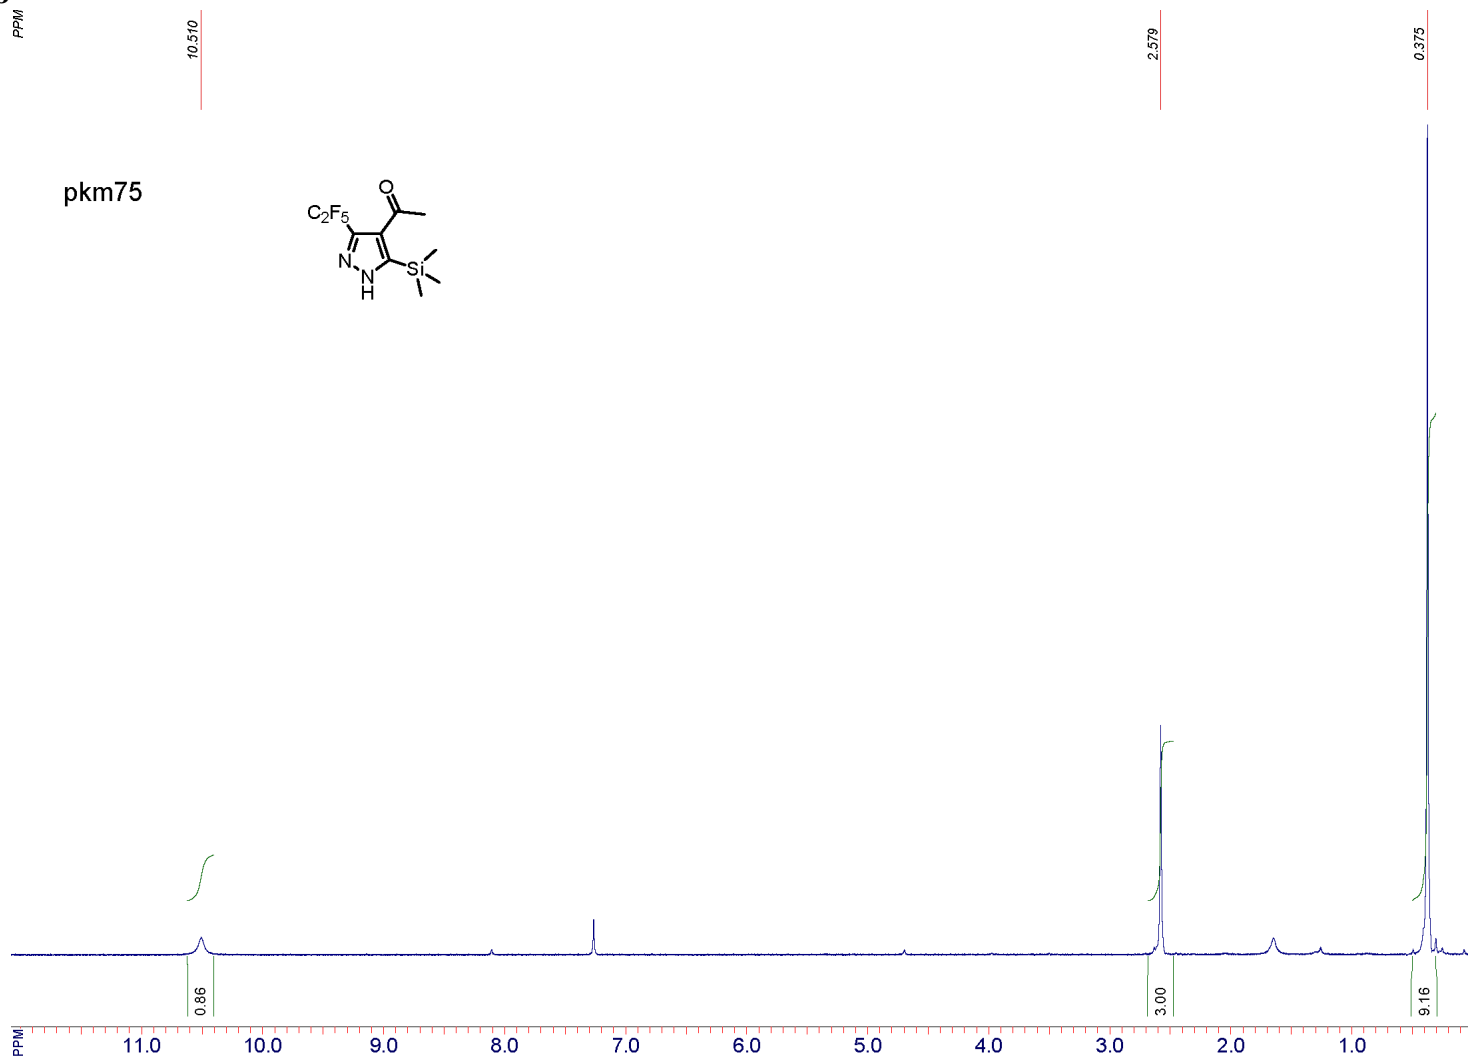

|                   |                |                  |         |                            |                                      |
|-------------------|----------------|------------------|---------|----------------------------|--------------------------------------|
| File name: pkm75  | Operator: root | SF: 499.9500 MHz | NSC: 1  | PW: 0.00 usec, RG: 16      | SI: 32768                            |
| Date: 03-Oct-2013 | Solvent: CDCl3 | SW: 8993 Hz      | TE: 0 K | AQ: 1.82 sec, RD: 0.00 sec | Parameter file, XWIN-NMR Version 3.5 |

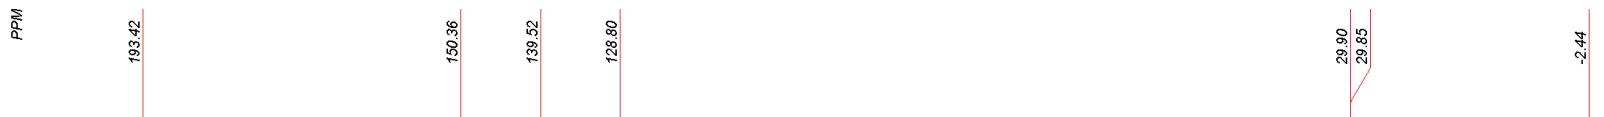

pkm75\_C13

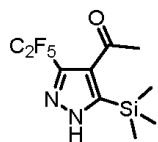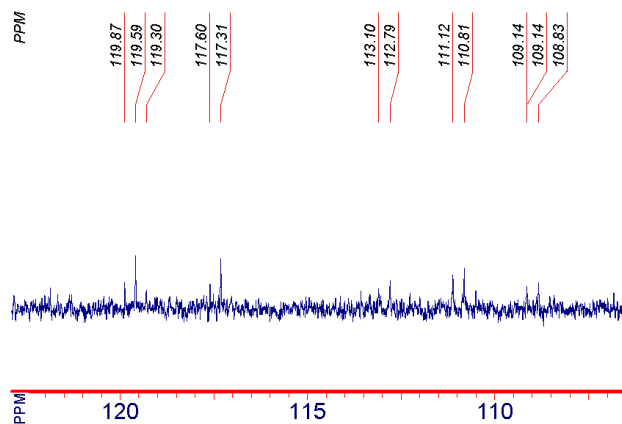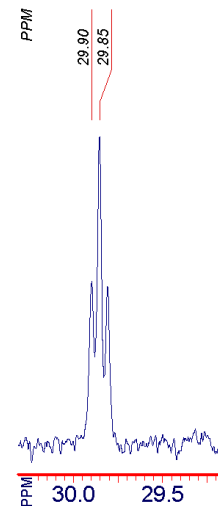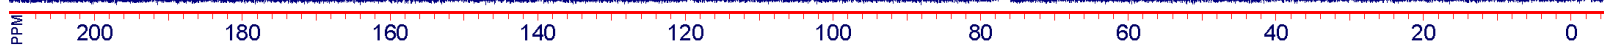

|                      |                |                  |           |                            |                                      |
|----------------------|----------------|------------------|-----------|----------------------------|--------------------------------------|
| File name: pkm75_C13 | Operator: root | SF: 125.7126 MHz | NSC: 7696 | PW: 0.00 usec, RG: 51200   | SI: 65536                            |
| Date: 03-Oct-2013    | Solvent: CDCl3 | SW: 32680 Hz     | TE: 0 K   | AQ: 1.57 sec, RD: 0.00 sec | Parameter file, XWIN-NMR Version 3.5 |

PPM

-82.37

-104.89

pkm75\_F19.fid

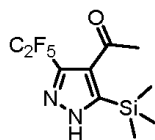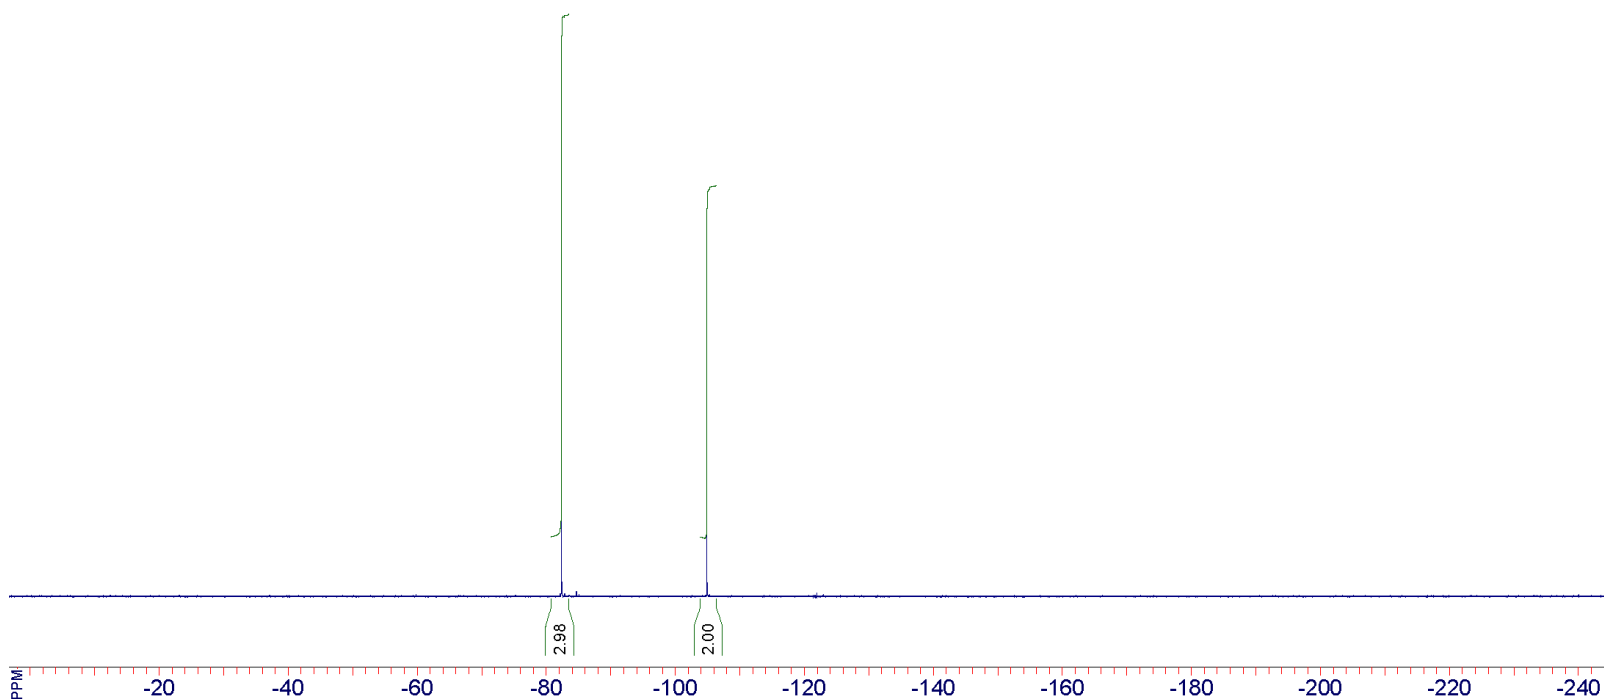

|                          |                |                  |           |                            |            |
|--------------------------|----------------|------------------|-----------|----------------------------|------------|
| File name: pkm75_F19.fid | Operator:      | SF: 376.3189 MHz | NSC: 0    | PW: 3.00 usec, RG: 16      | SI: 131072 |
| Date: 08-Oct-2013        | Solvent: cdcl3 | SW: 94118 Hz     | TE: 293 K | AQ: 0.68 sec, RD: 0.00 sec | □          |

# Compound 20b

PPM

10.597

4.677

0.404

pkm-124

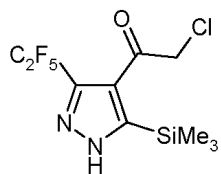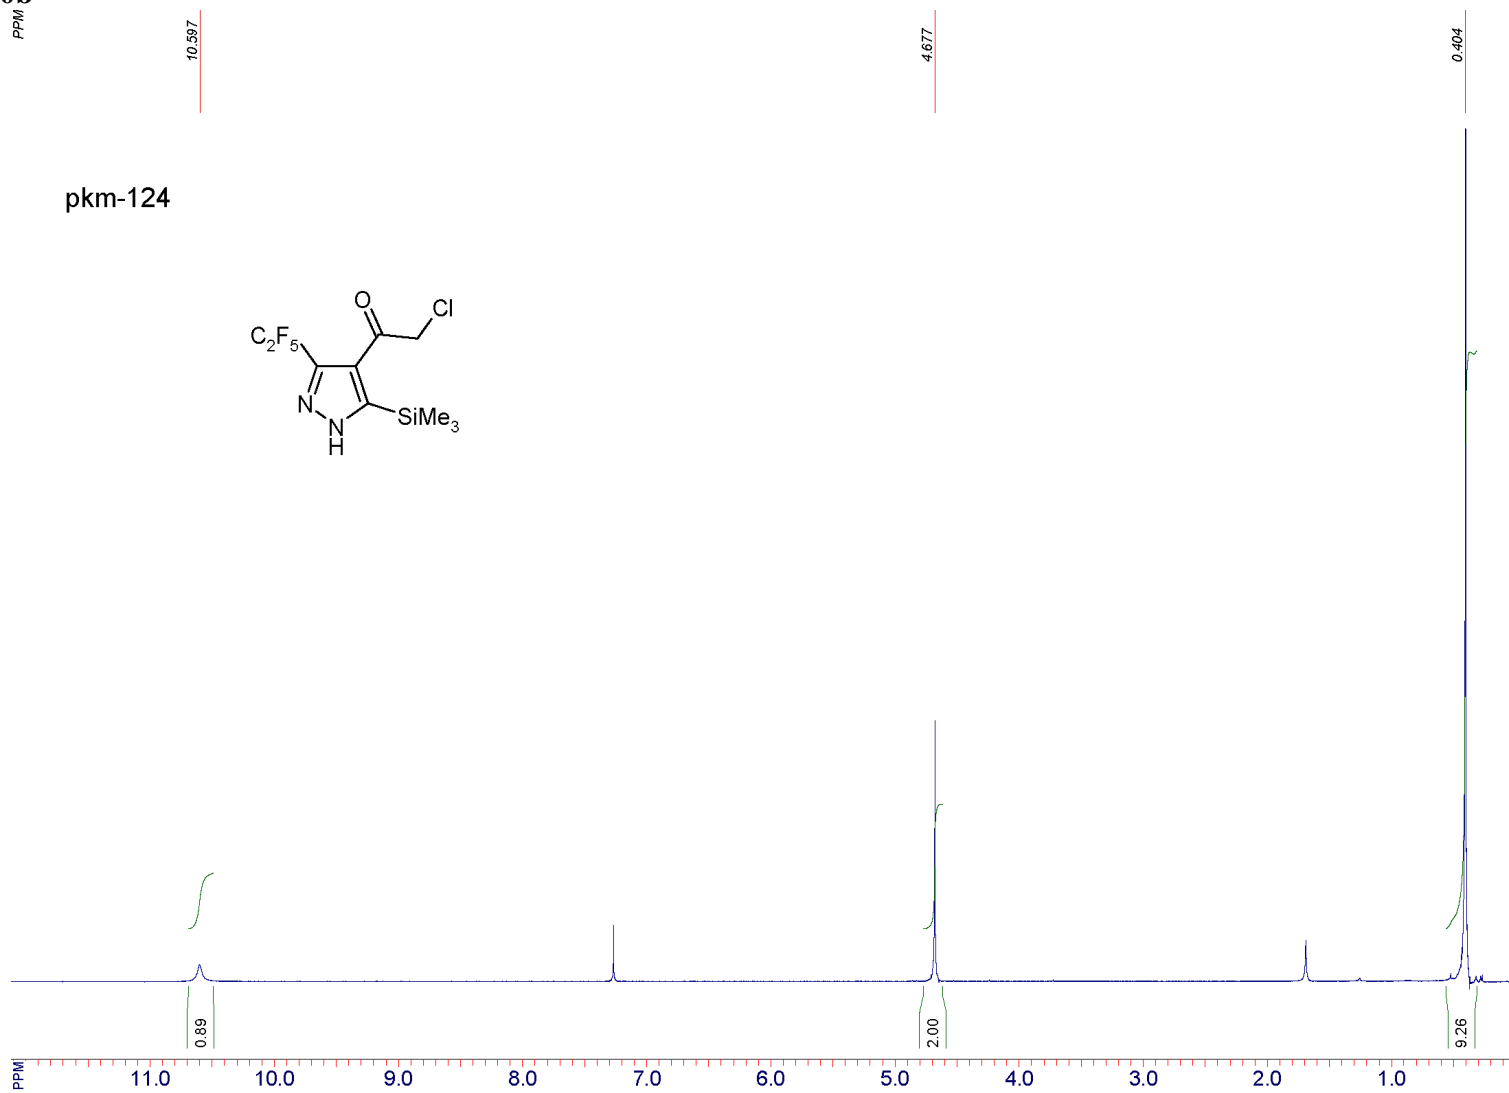

|                    |                |                  |         |                            |                                      |
|--------------------|----------------|------------------|---------|----------------------------|--------------------------------------|
| File name: pkm-124 | Operator: root | SF: 499.9500 MHz | NSC: 1  | PW: 0.00 usec, RG: 50      | SI: 32768                            |
| Date: 12-Dec-2013  | Solvent: CDCl3 | SW: 8993 Hz      | TE: 0 K | AQ: 1.82 sec, RD: 0.00 sec | Parameter file, XWIN-NMR Version 3.5 |

PPM

pkm124\_C13

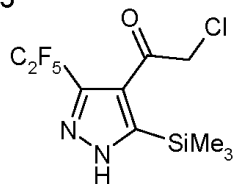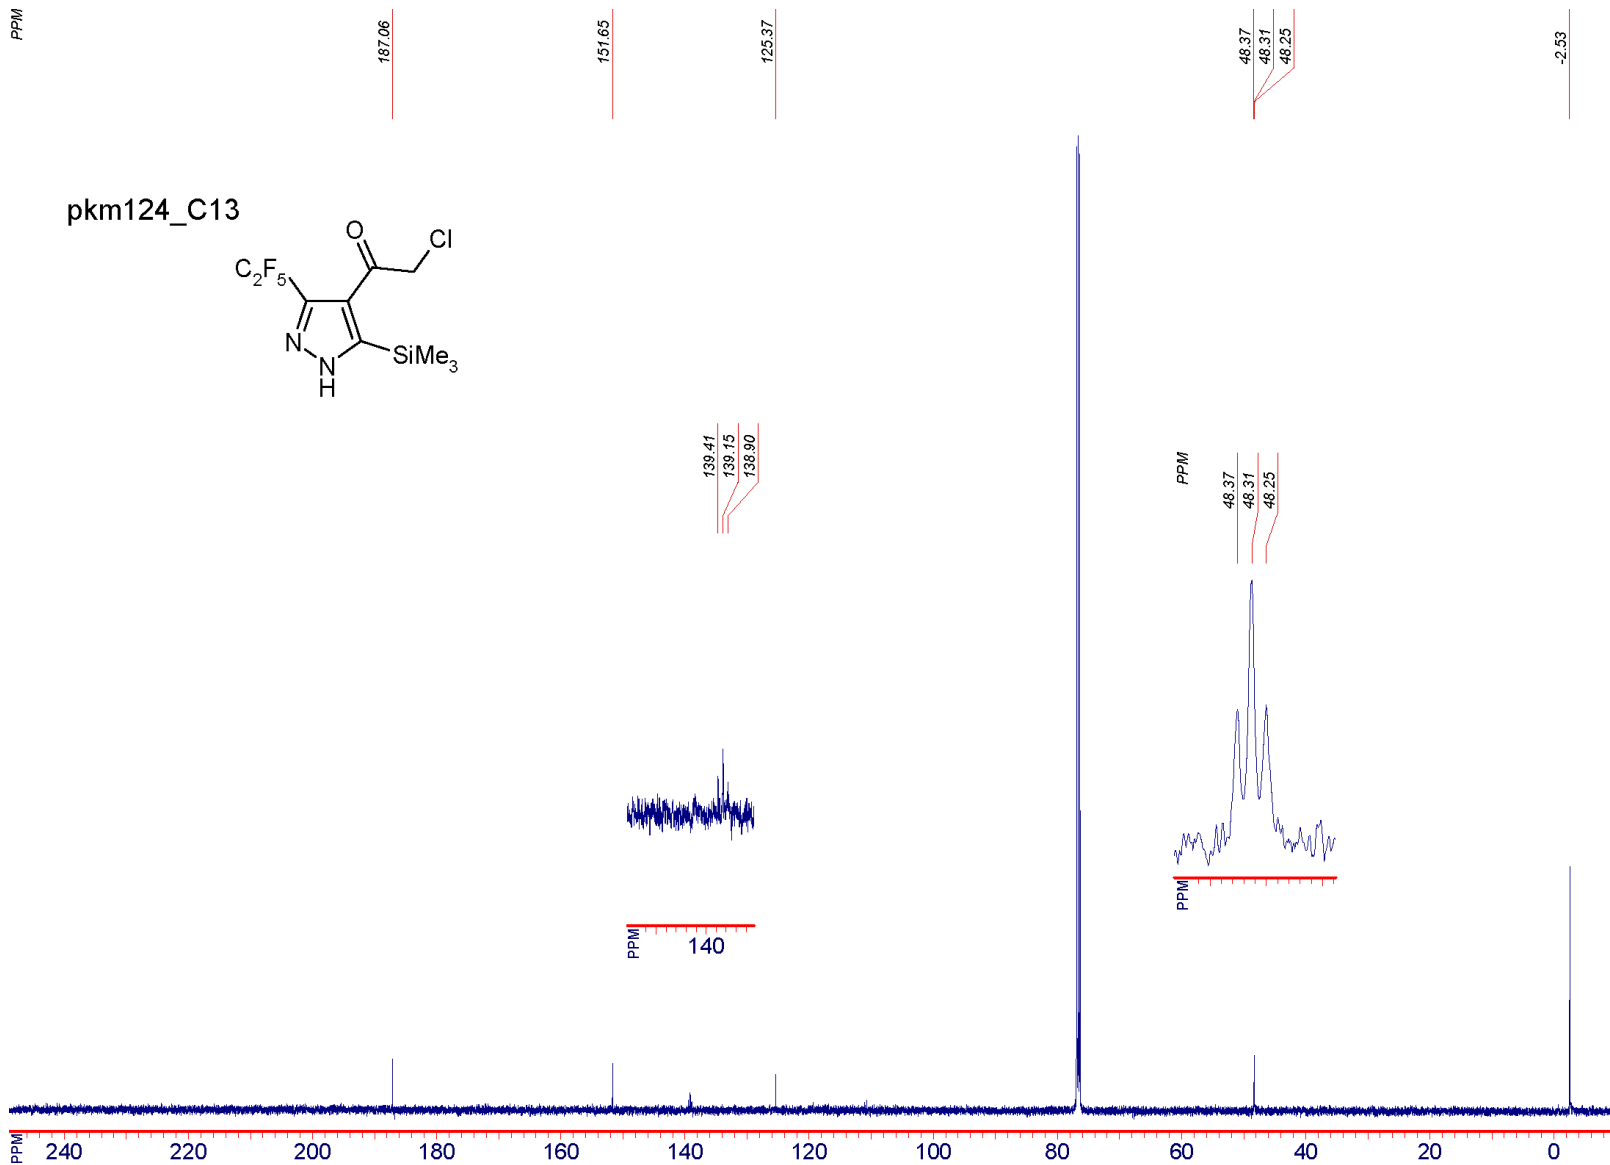

|                       |                |                  |           |                            |                                     |
|-----------------------|----------------|------------------|-----------|----------------------------|-------------------------------------|
| File name: pkm124_C13 | Operator: root | SF: 125.7126 MHz | NSC: 1154 | PW: 0.00 usec, RG: 51200   | SI: 65536                           |
| Date: 13-Dec-2013     | Solvent: dmsol | SW: 32680 Hz     | TE: 0 K   | AQ: 1.57 sec, RD: 0.00 sec | Parameter file, XWN-NMR Version 3.5 |

PPM

pkm124\_F19.fid

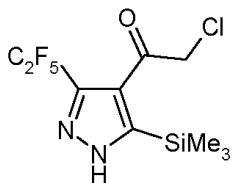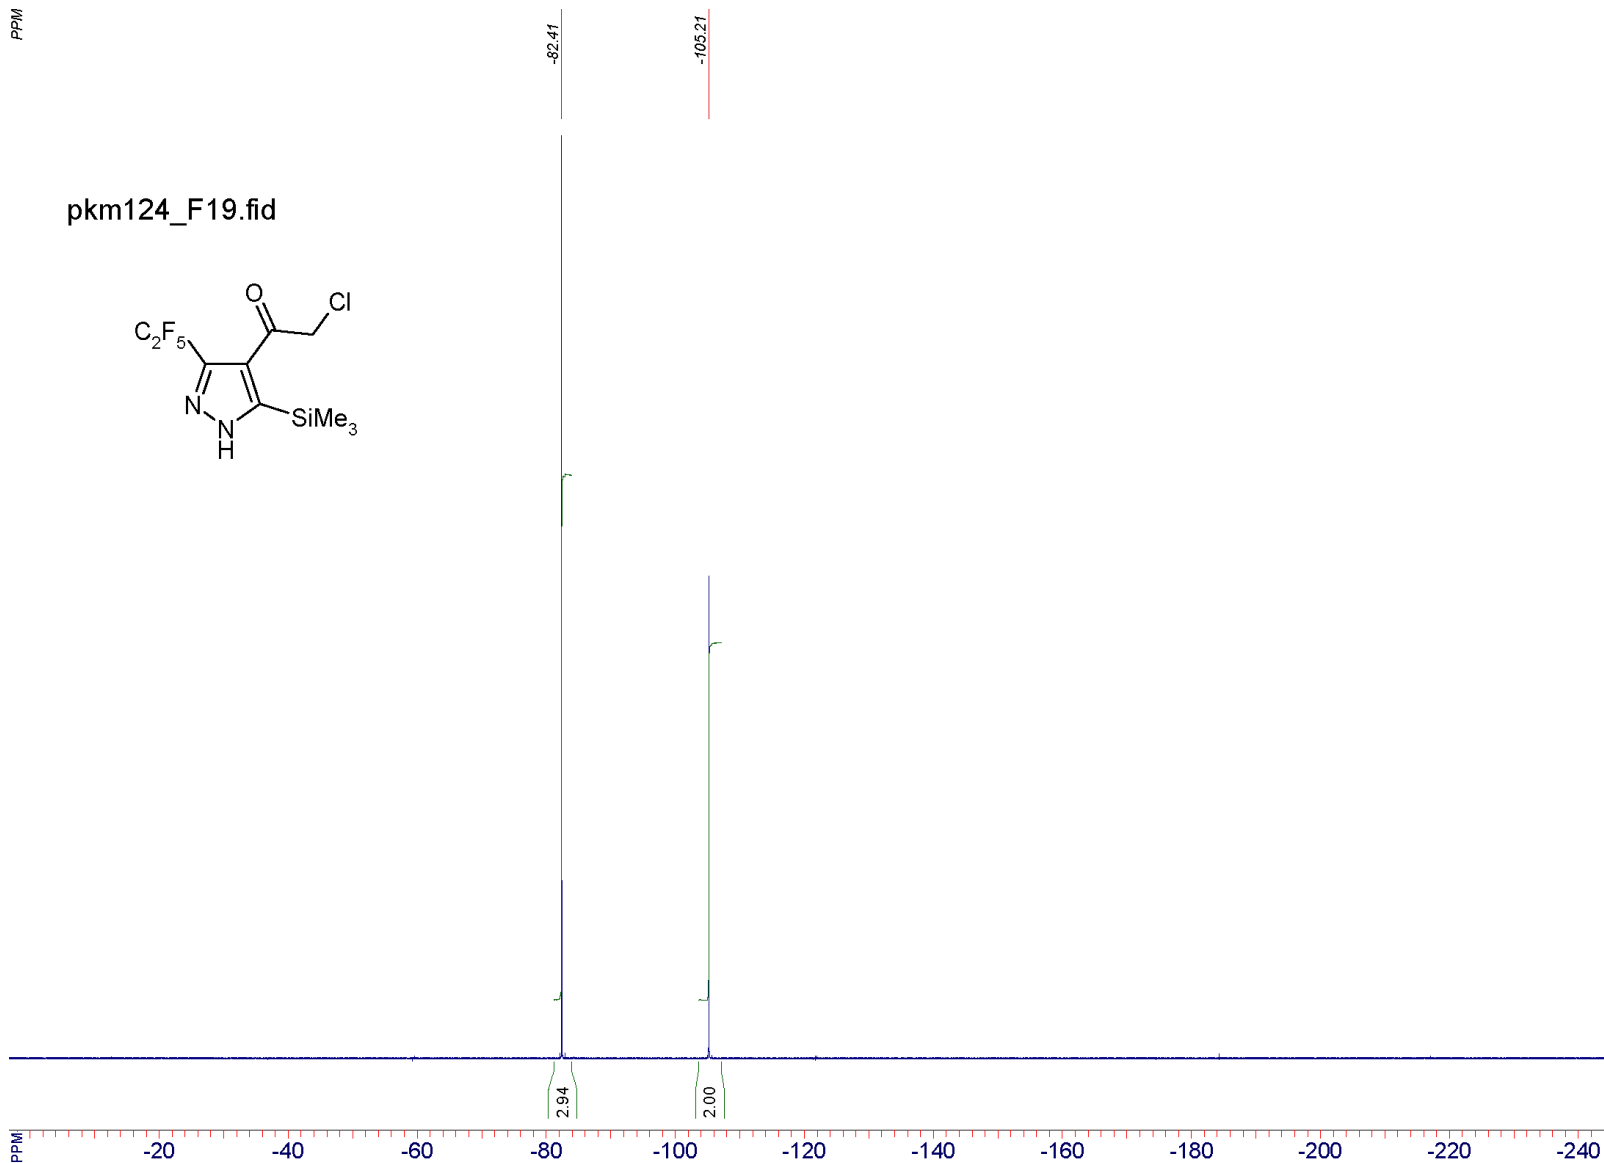

|                           |                |                  |           |                            |            |
|---------------------------|----------------|------------------|-----------|----------------------------|------------|
| File name: pkm124_F19.fid | Operator:      | SF: 376.3189 MHz | NSC: 0    | PW: 3.00 usec, RG: 16      | SI: 131072 |
| Date: 17-Dec-2013         | Solvent: cdcl3 | SW: 94118 Hz     | TE: 293 K | AQ: 0.68 sec, RD: 0.00 sec | □          |

Compound 21a/b

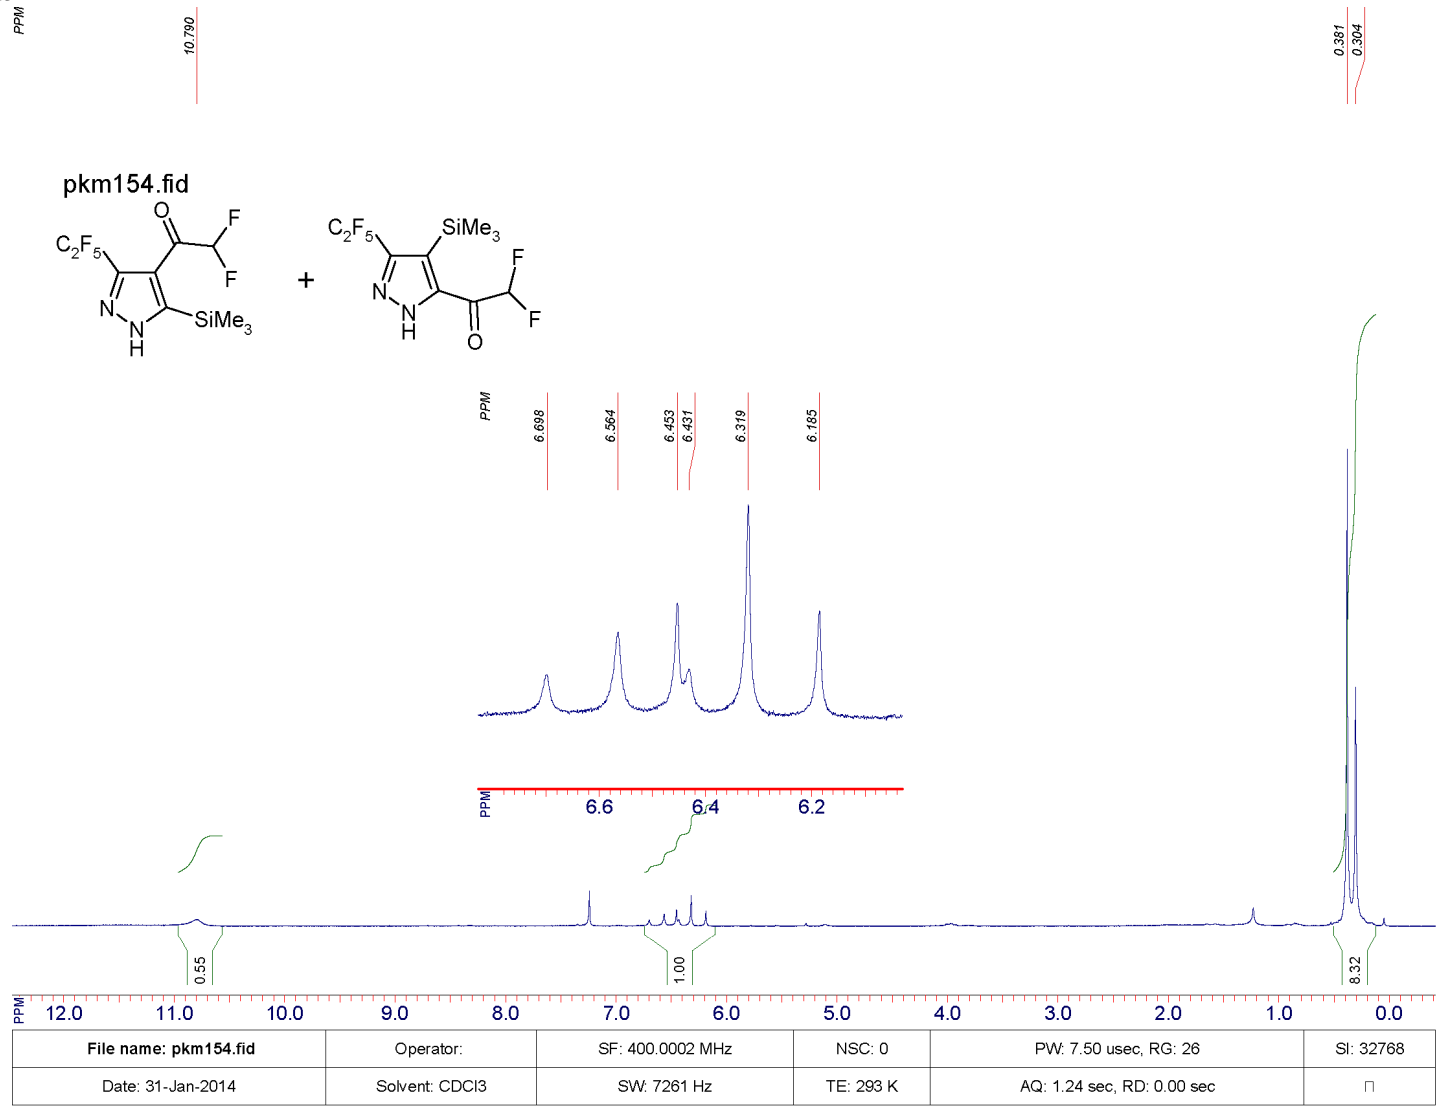



PPM

165.50  
165.29  
165.08

151.80

140.13  
139.89  
139.64

123.24

-0.55  
-2.55

pkm14\_C13

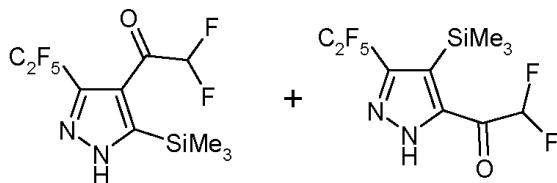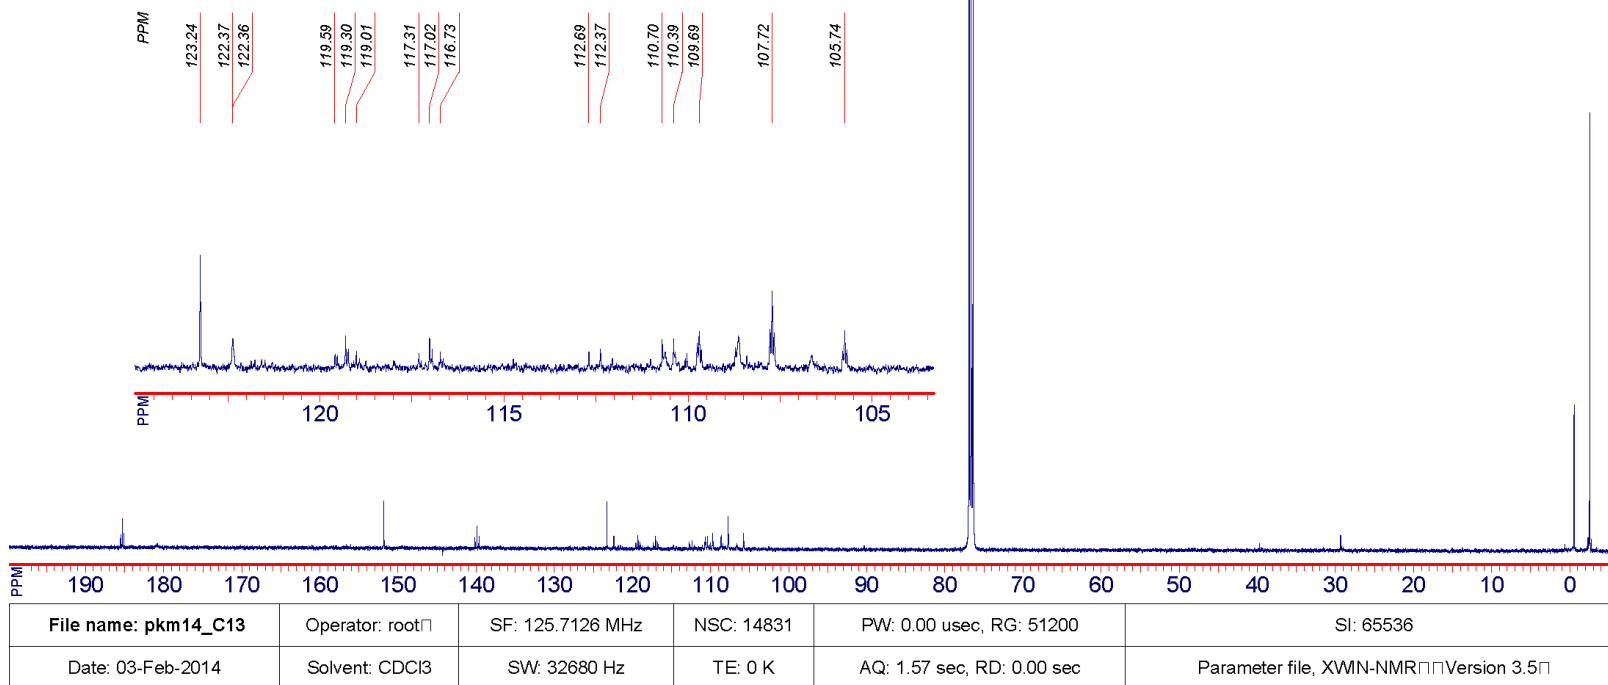

PPM

-63.06  
-63.84

-107.20  
-108.42

pkm154\_F19.fid

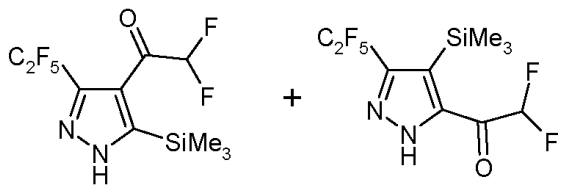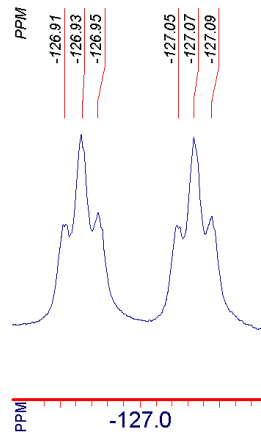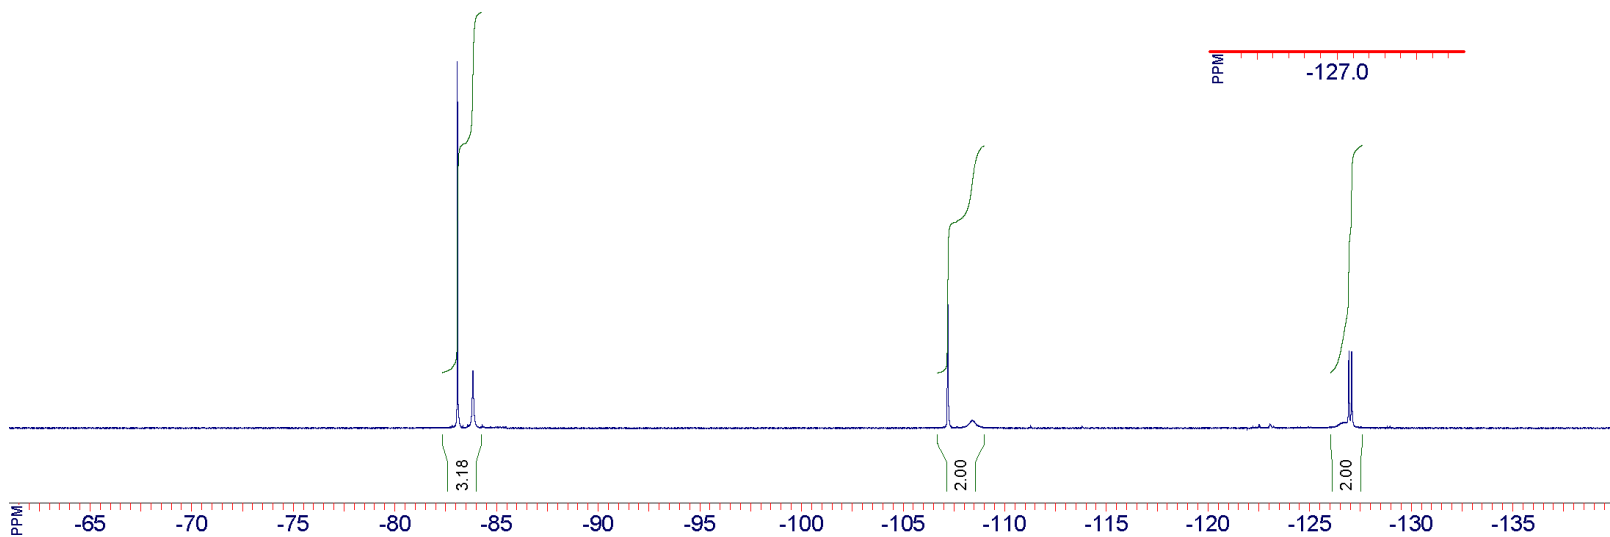

|                           |                |                  |           |                            |            |
|---------------------------|----------------|------------------|-----------|----------------------------|------------|
| File name: pkm154_F19.fid | Operator:      | SF: 376.3189 MHz | NSC: 0    | PW: 3.00 usec, RG: 16      | SI: 131072 |
| Date: 04-Feb-2014         | Solvent: cdcl3 | SW: 94118 Hz     | TE: 293 K | AQ: 0.68 sec, RD: 0.00 sec | □          |

# Compound 23

PPM

pkm102

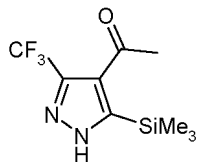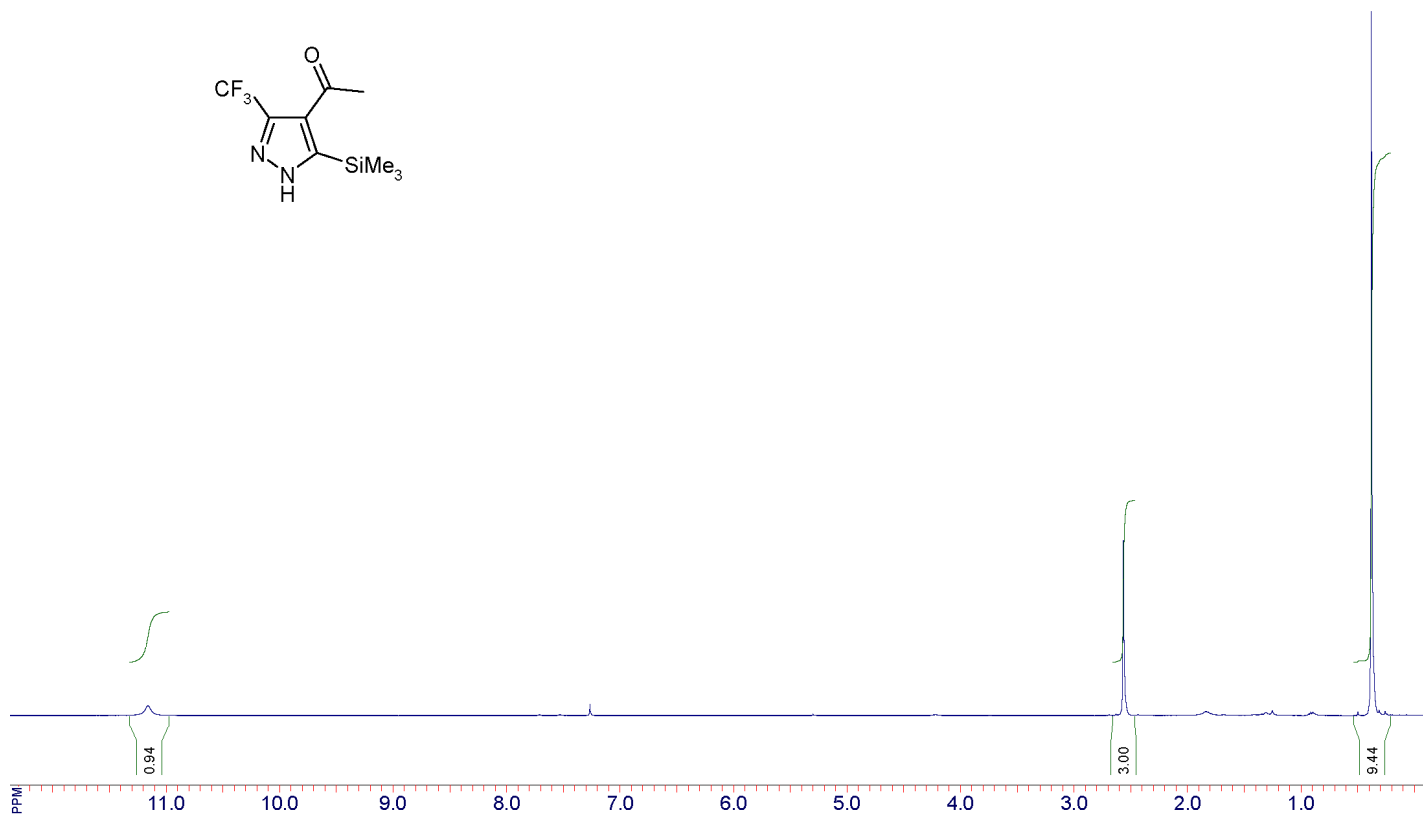

|                   |                |                  |         |                            |                                      |
|-------------------|----------------|------------------|---------|----------------------------|--------------------------------------|
| File name: pkm102 | Operator: root | SF: 499.9500 MHz | NSC: 1  | PW: 0.00 usec, RG: 32      | SI: 32768                            |
| Date: 31-Oct-2013 | Solvent: DMSO  | SW: 8993 Hz      | TE: 0 K | AQ: 1.82 sec, RD: 0.00 sec | Parameter file, XWIN-NMR Version 3.5 |

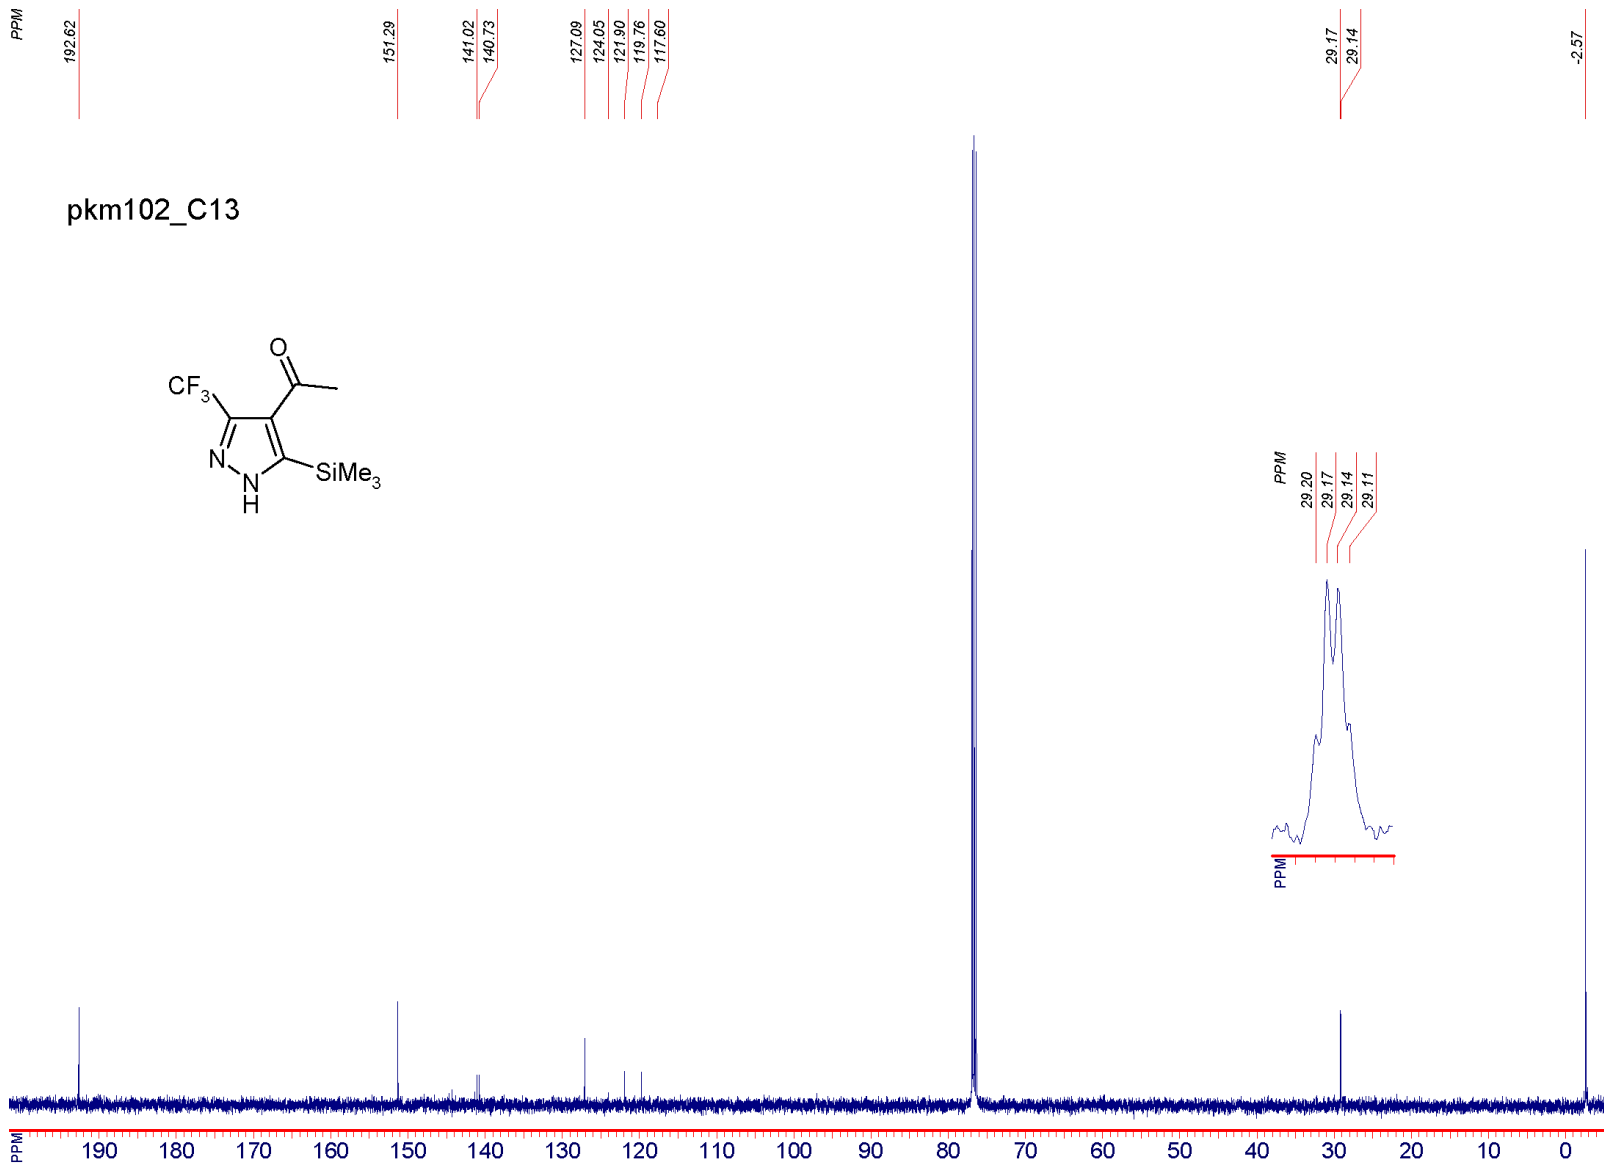

|                       |                |                  |          |                            |                                      |
|-----------------------|----------------|------------------|----------|----------------------------|--------------------------------------|
| File name: pkm102_C13 | Operator: root | SF: 125.7126 MHz | NSC: 431 | PW: 0.00 usec, RG: 51200   | SI: 65536                            |
| Date: 31-Oct-2013     | Solvent: dms0  | SW: 32680 Hz     | TE: 0 K  | AQ: 1.57 sec, RD: 0.00 sec | Parameter file, XWIN-NMR Version 3.5 |

174-f.fid

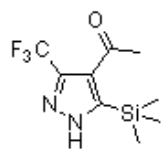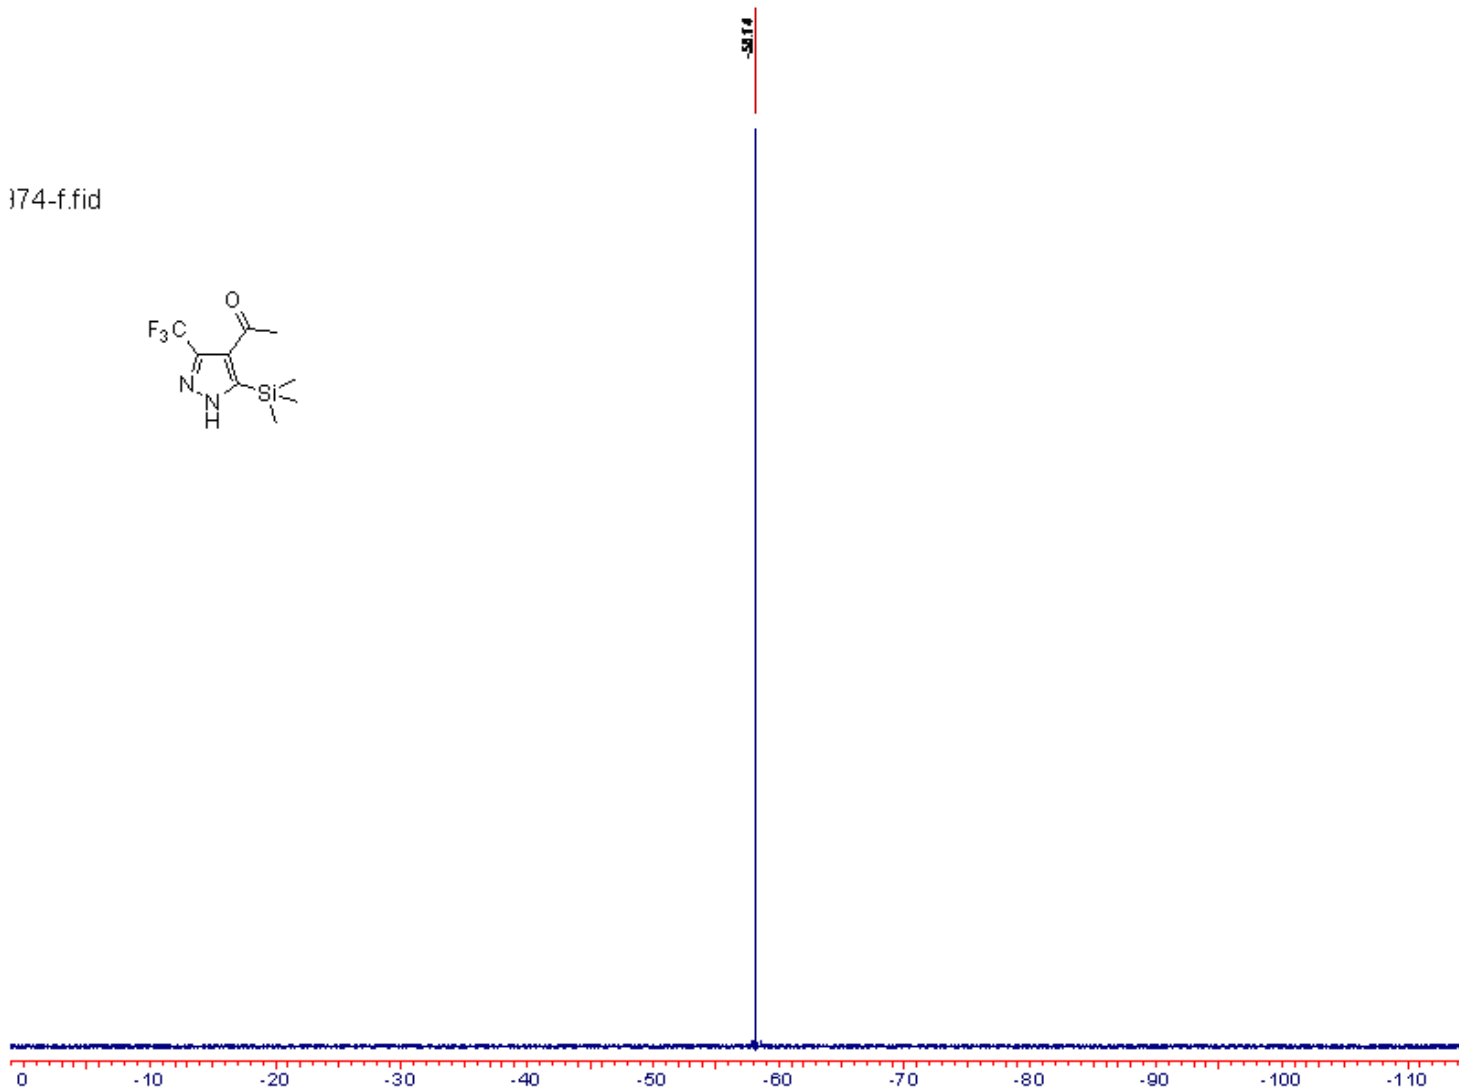

# Compound 24

PPM

pkm-152

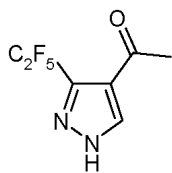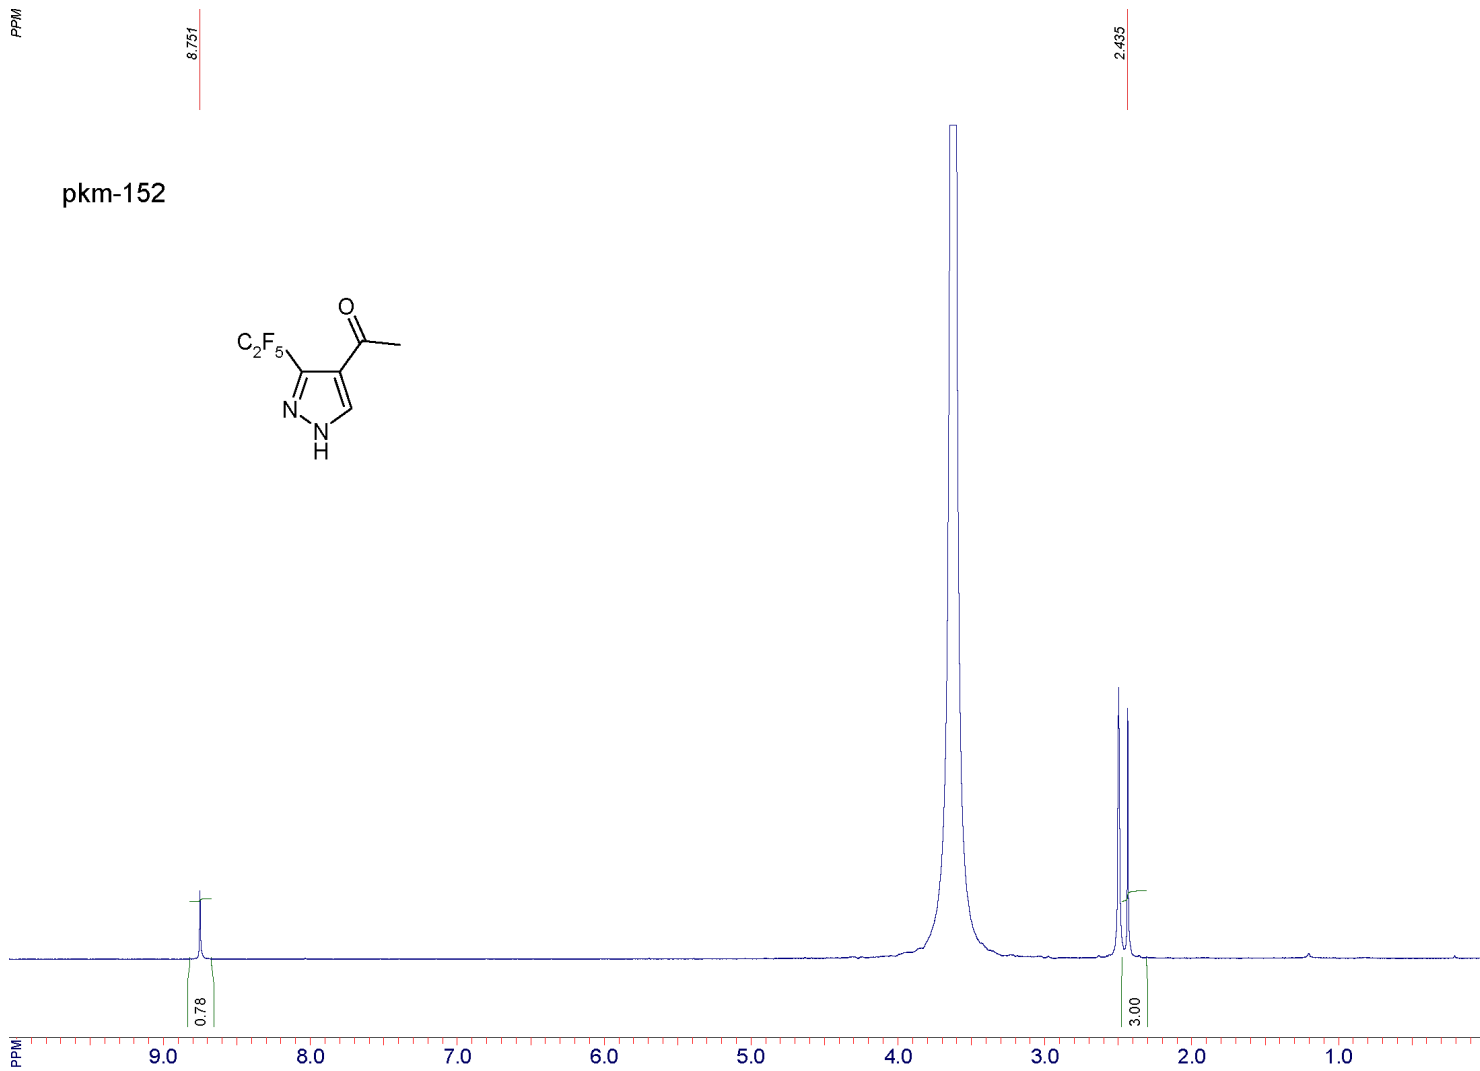

|                    |                |                  |         |                            |                                      |
|--------------------|----------------|------------------|---------|----------------------------|--------------------------------------|
| File name: pkm-152 | Operator: root | SF: 499.9500 MHz | NSC: 1  | PW: 0.00 usec, RG: 32      | SI: 32768                            |
| Date: 28-Jan-2014  | Solvent: DMSO  | SW: 8993 Hz      | TE: 0 K | AQ: 1.82 sec, RD: 0.00 sec | Parameter file, XWIN-NMR\Version 3.5 |

PPM

190.22

136.74

121.48

28.95

pkm152\_C13

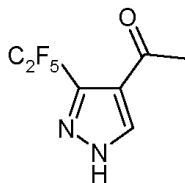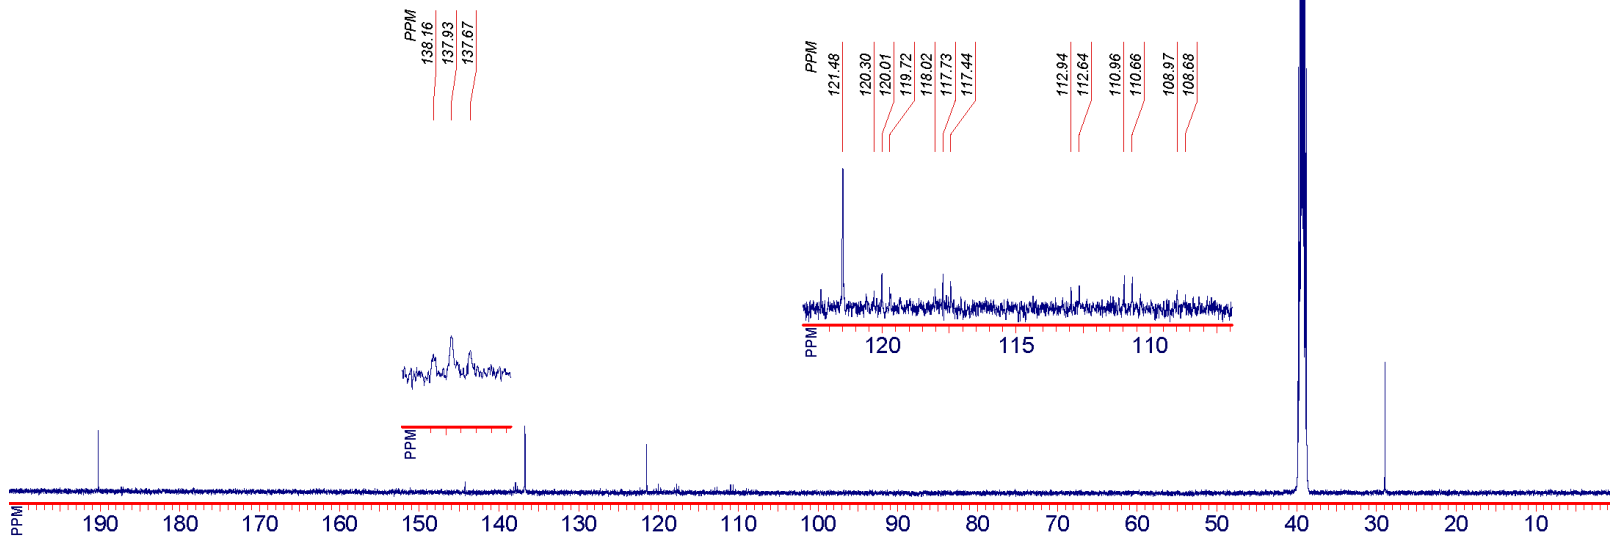

|                       |                |                  |            |                            |                                      |
|-----------------------|----------------|------------------|------------|----------------------------|--------------------------------------|
| File name: pkm152_C13 | Operator: root | SF: 125.7126 MHz | NSC: 10240 | PW: 0.00 usec, RG: 51200   | SI: 65536                            |
| Date: 31-Jan-2014     | Solvent: dms0  | SW: 32680 Hz     | TE: 0 K    | AQ: 1.57 sec, RD: 0.00 sec | Parameter file, XWIN-NMR Version 3.5 |

PPM

pkm152\_F19.fid

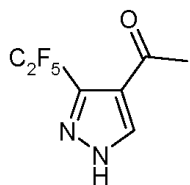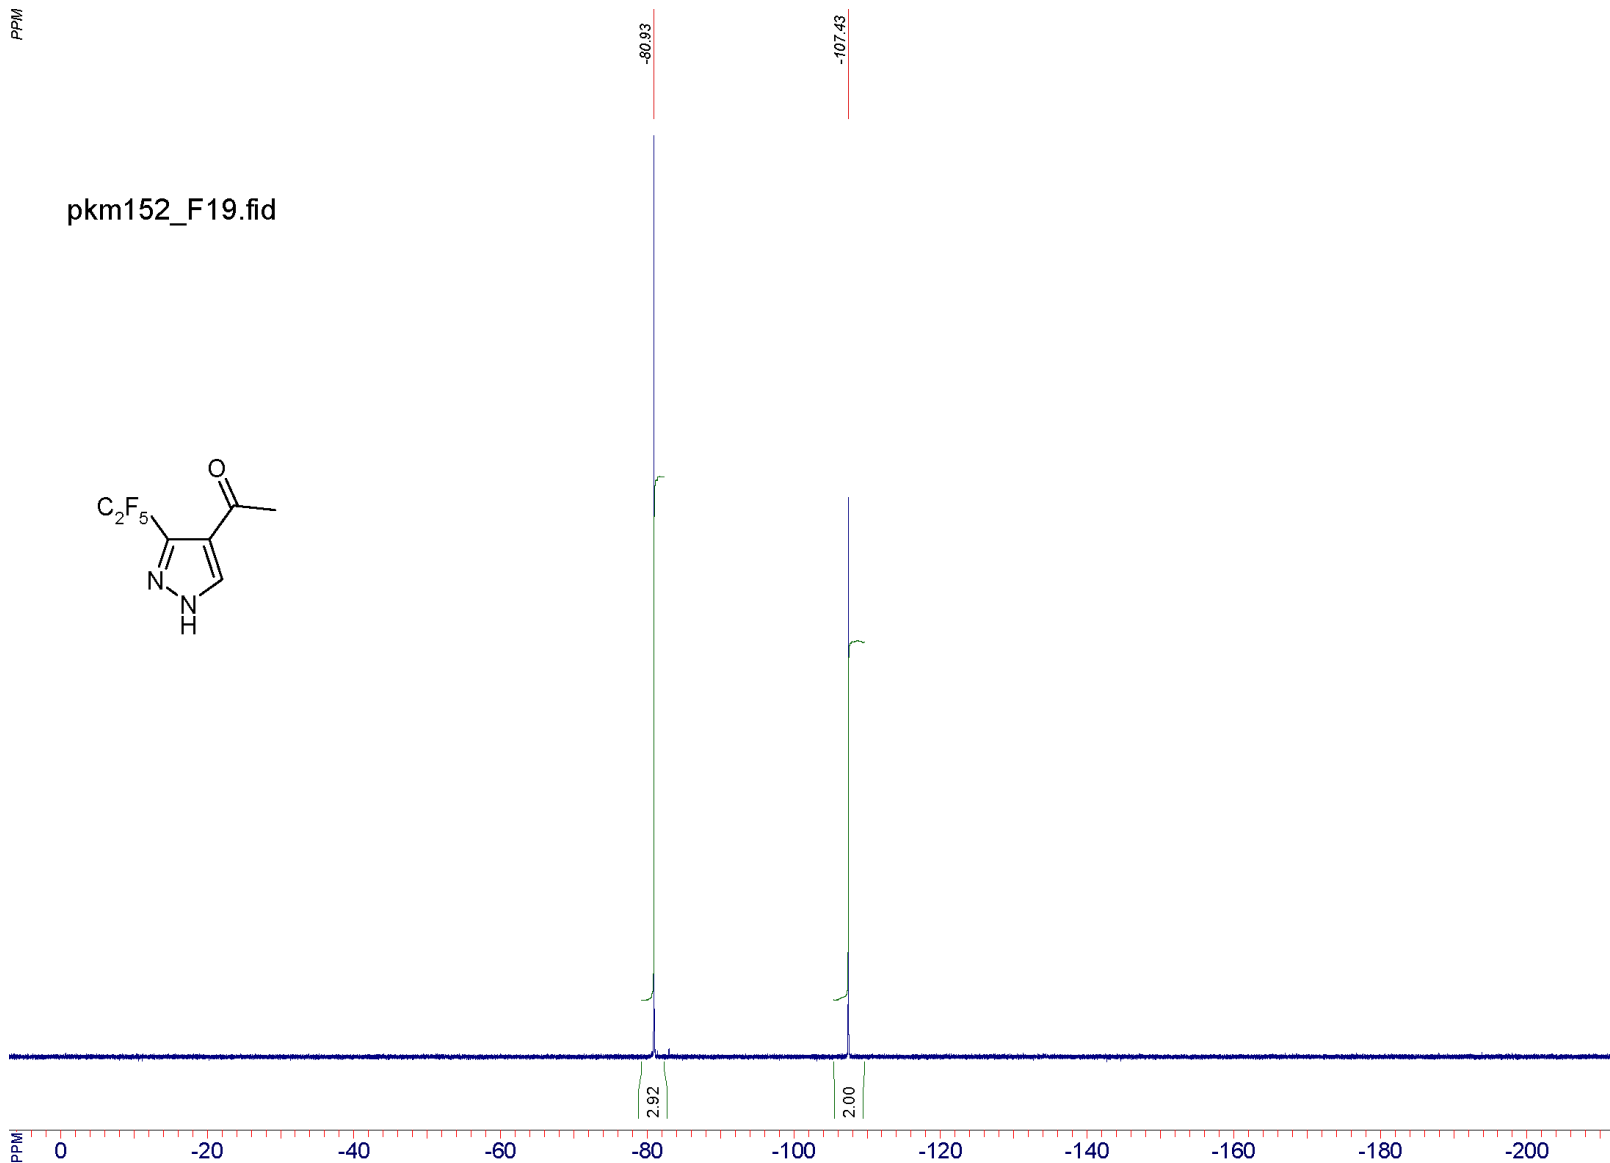

|                           |                   |                  |           |                            |           |
|---------------------------|-------------------|------------------|-----------|----------------------------|-----------|
| File name: pkm152_F19.fid | Operator:         | SF: 376.3274 MHz | NSC: 0    | PW: 3.00 usec, RG: 22      | SI: 65536 |
| Date: 04-Feb-2014         | Solvent: dmsol-d6 | SW: 82816 Hz     | TE: 293 K | AQ: 0.39 sec, RD: 0.00 sec | □         |



# Compound 25

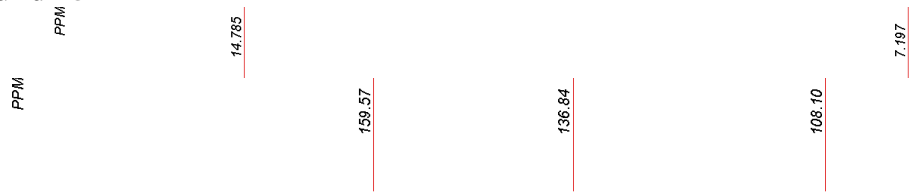

acid\_C13

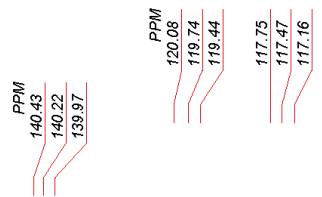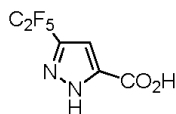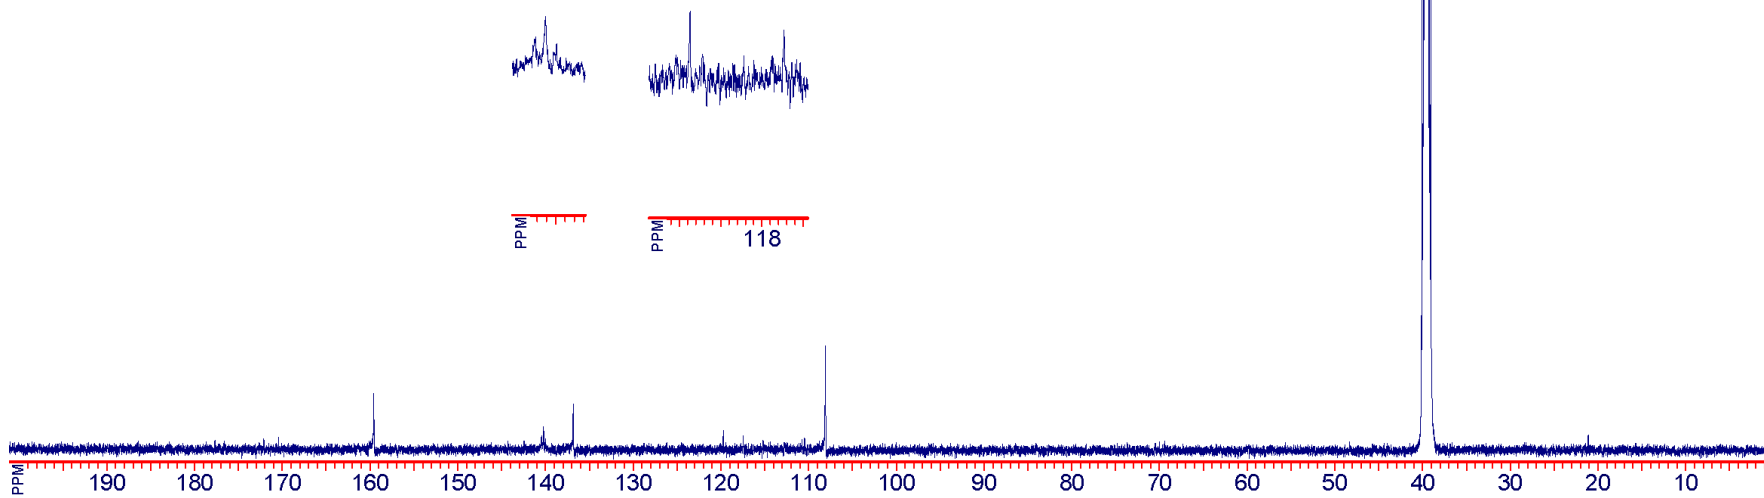

|                     |                |                  |           |                            |                                      |
|---------------------|----------------|------------------|-----------|----------------------------|--------------------------------------|
| File name: acid_C13 | Operator: root | SF: 125.7126 MHz | NSC: 5120 | PW: 0.00 usec, RG: 51200   | SI: 65536                            |
| Date: 18-Jul-2014   | Solvent: dmso  | SW: 32680 Hz     | TE: 0 K   | AQ: 1.57 sec, RD: 0.00 sec | Parameter file, XWIN-NMR Version 3.5 |

PPM

-85.25

-113.91

acid\_F19.fid

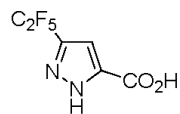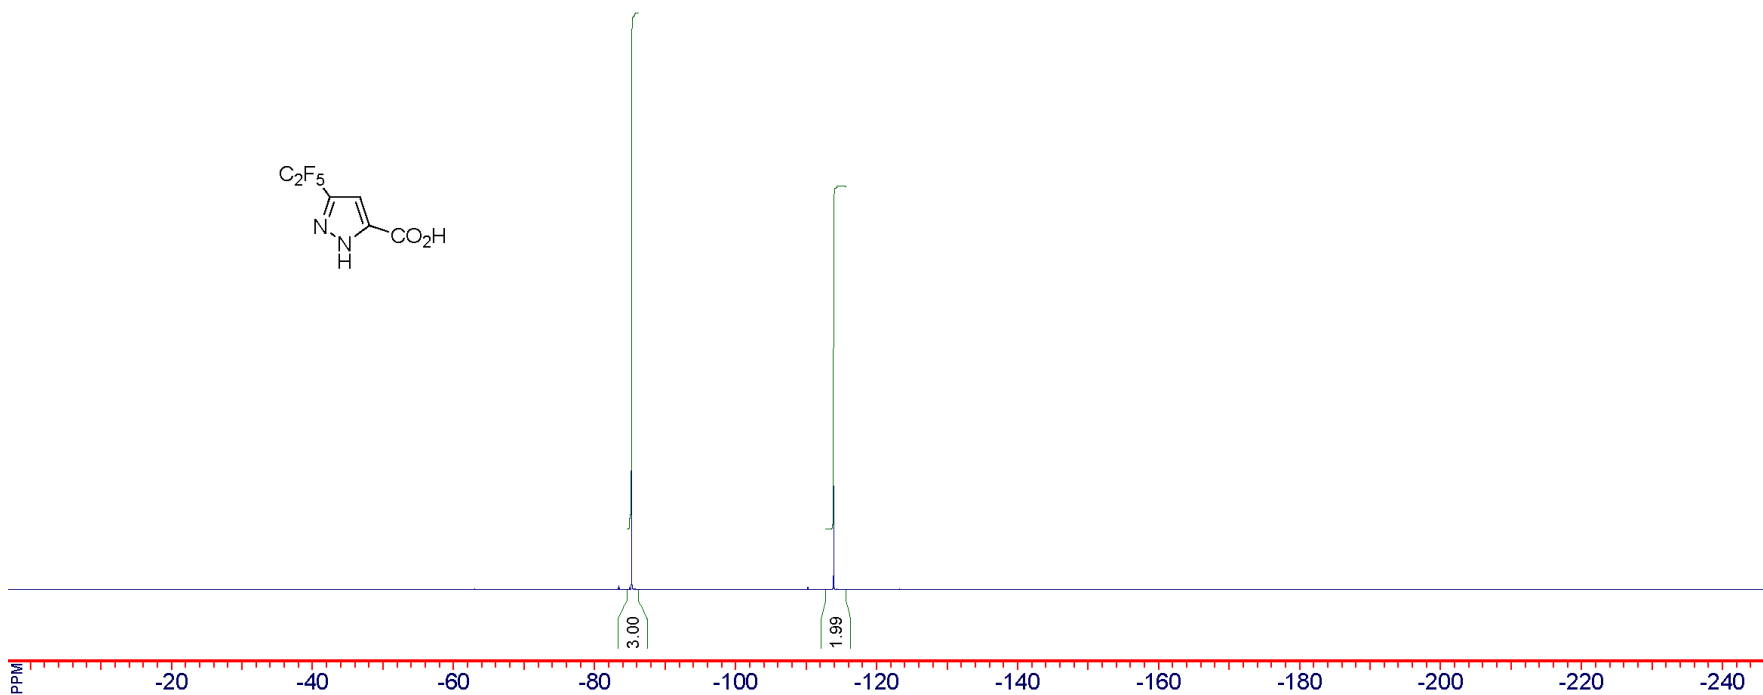

|                         |                |                  |           |                            |           |
|-------------------------|----------------|------------------|-----------|----------------------------|-----------|
| File name: acid_F19.fid | Operator:      | SF: 376.3189 MHz | NSC: 0    | PW: 3.00 usec, RG: 32      | SI: 65536 |
| Date: 20-May-2014       | Solvent: cdcl3 | SW: 94118 Hz     | TE: 293 K | AQ: 0.34 sec, RD: 0.00 sec | □         |

# Compound 26

PPM

7.101

4.249

3.916

pkm-209

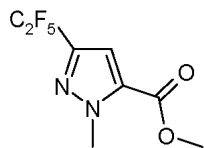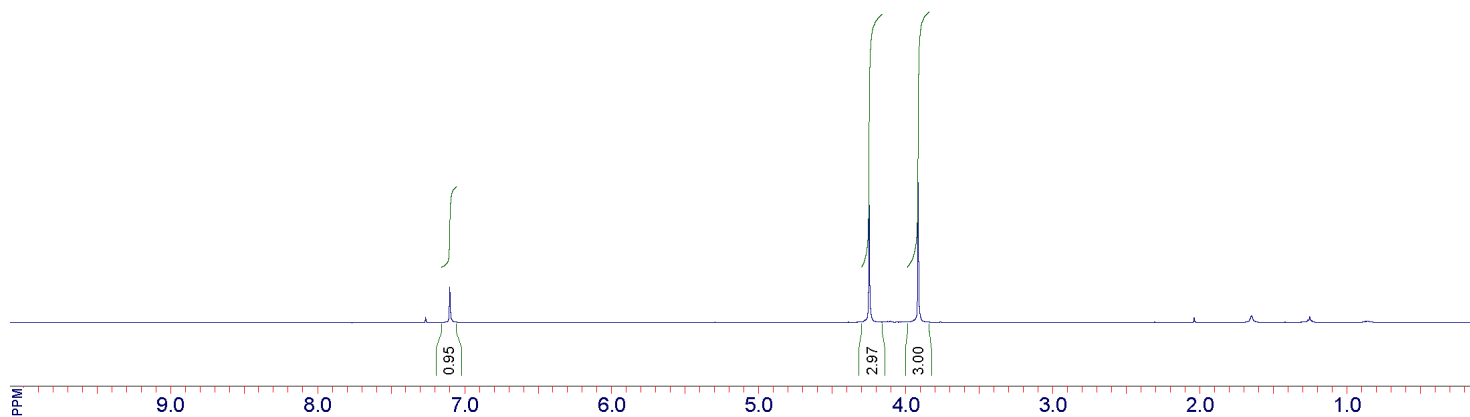

|                    |                |                  |         |                            |                                      |
|--------------------|----------------|------------------|---------|----------------------------|--------------------------------------|
| File name: pkm-209 | Operator: root | SF: 499.9500 MHz | NSC: 1  | PW: 0.00 usec, RG: 24      | SI: 32768                            |
| Date: 16-May-2014  | Solvent: CDCl3 | SW: 8993 Hz      | TE: 0 K | AQ: 1.82 sec, RD: 0.00 sec | Parameter file, XWIN-NMR Version 3.5 |

PPM

158.91

139.27

139.04

138.80

133.48

110.41

51.95

39.99

pkm209 C13

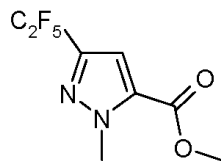

PPM

119.74

119.44

119.14

117.47

117.17

116.87

112.08

111.76

110.41

110.08

109.77

108.08

107.76

PPM

120

115

110

PPM

139.27

139.04

138.80

PPM

PPM

190

180

170

160

150

140

130

120

110

100

90

80

70

60

50

40

30

20

10

File name: pkm209 C13

Operator: root

SF: 125.7126 MHz

NSC: 1501

PW: 0.00 usec, RG: 51200

SI: 65536

Date: 18-May-2014

Solvent: CDCl3

SW: 32680 Hz

TE: 0 K

AQ: 1.57 sec, RD: 0.00 sec

Parameter file, XWIN-NMR Version 3.5

PPM

pkm209\_F19.fid

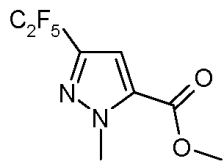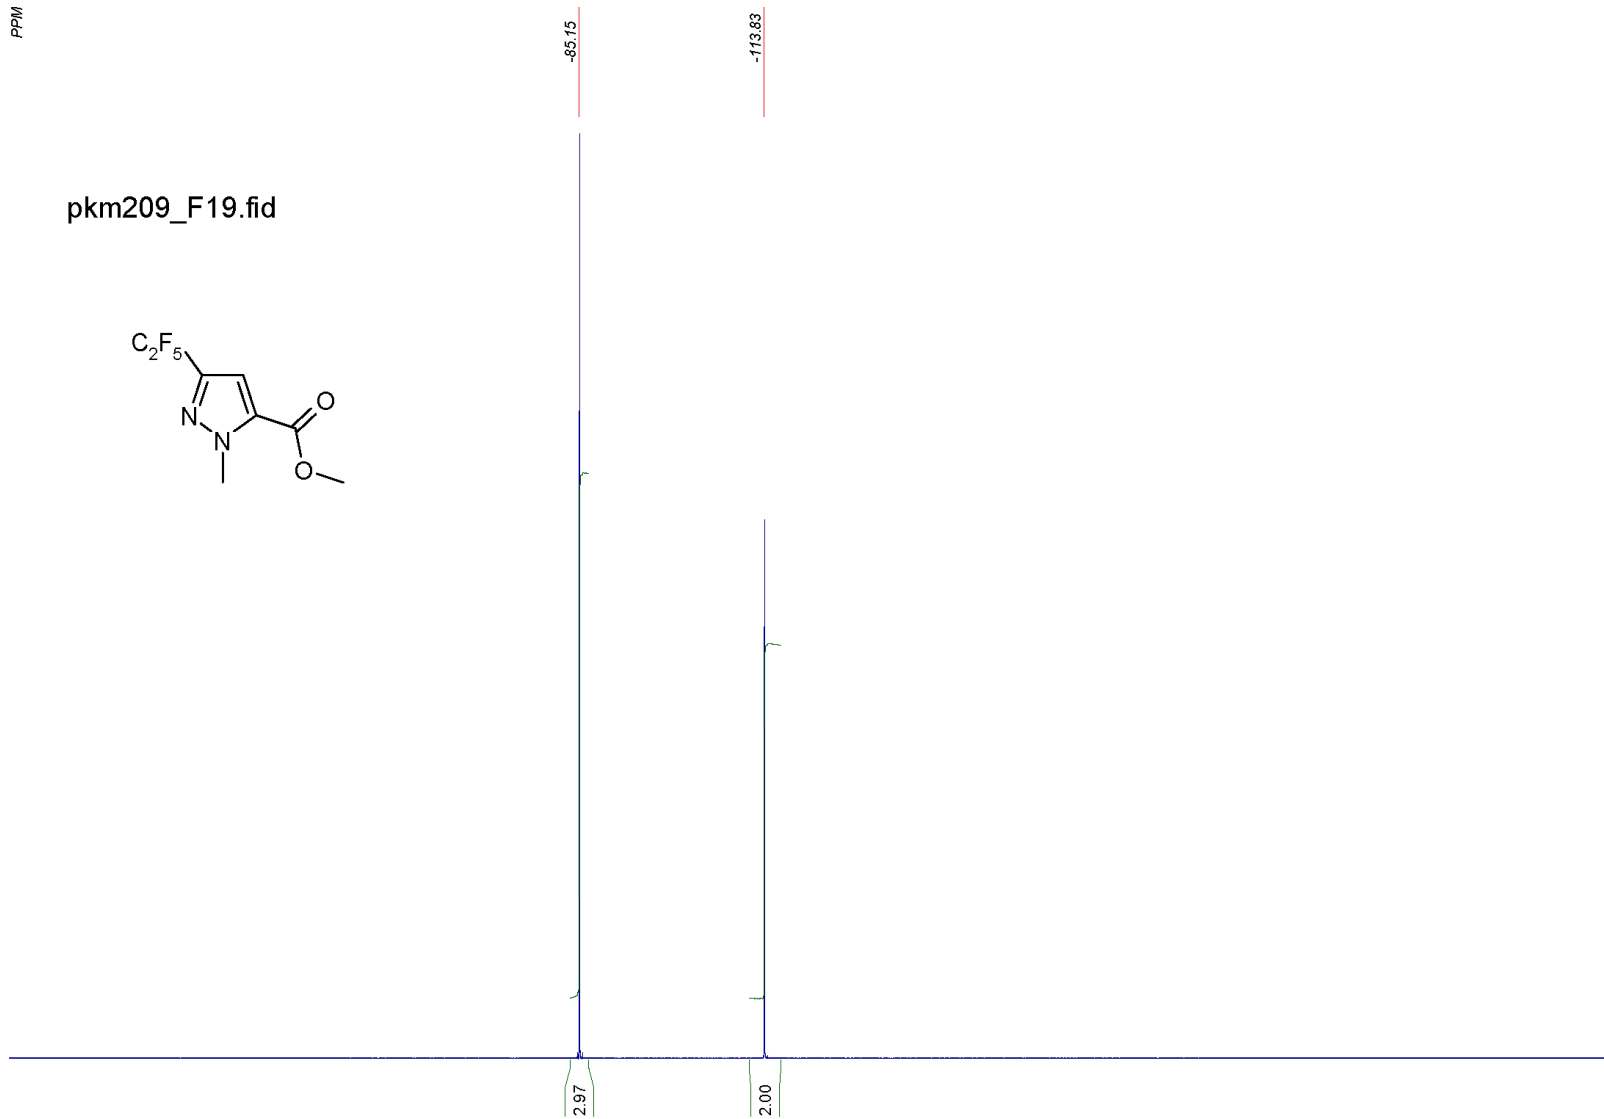

|                           |                |                  |           |                            |           |
|---------------------------|----------------|------------------|-----------|----------------------------|-----------|
| File name: pkm209_F19.fid | Operator:      | SF: 376.3189 MHz | NSC: 0    | PW: 3.00 usec, RG: 32      | SI: 65536 |
| Date: 20-May-2014         | Solvent: cdcl3 | SW: 94118 Hz     | TE: 293 K | AQ: 0.34 sec, RD: 0.00 sec | □         |

# Compound 27

PPM

pkm221

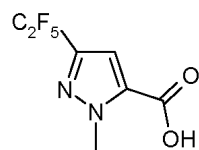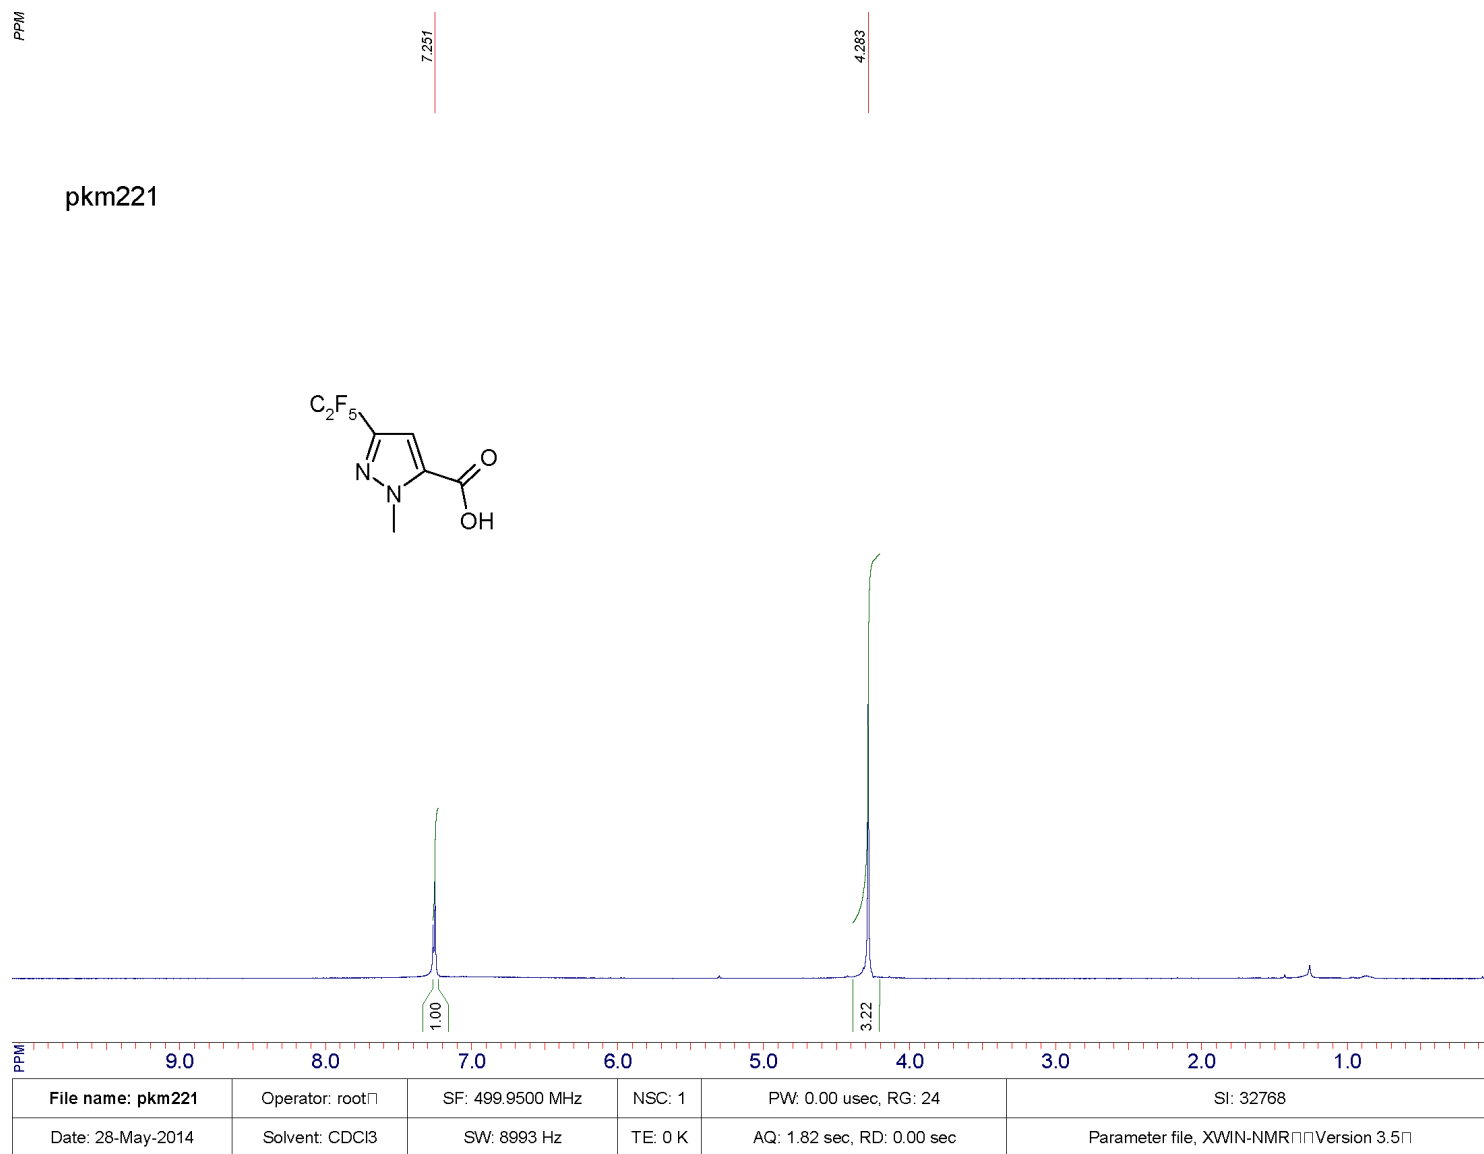

PPM

pkm221\_C13

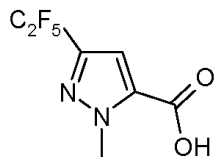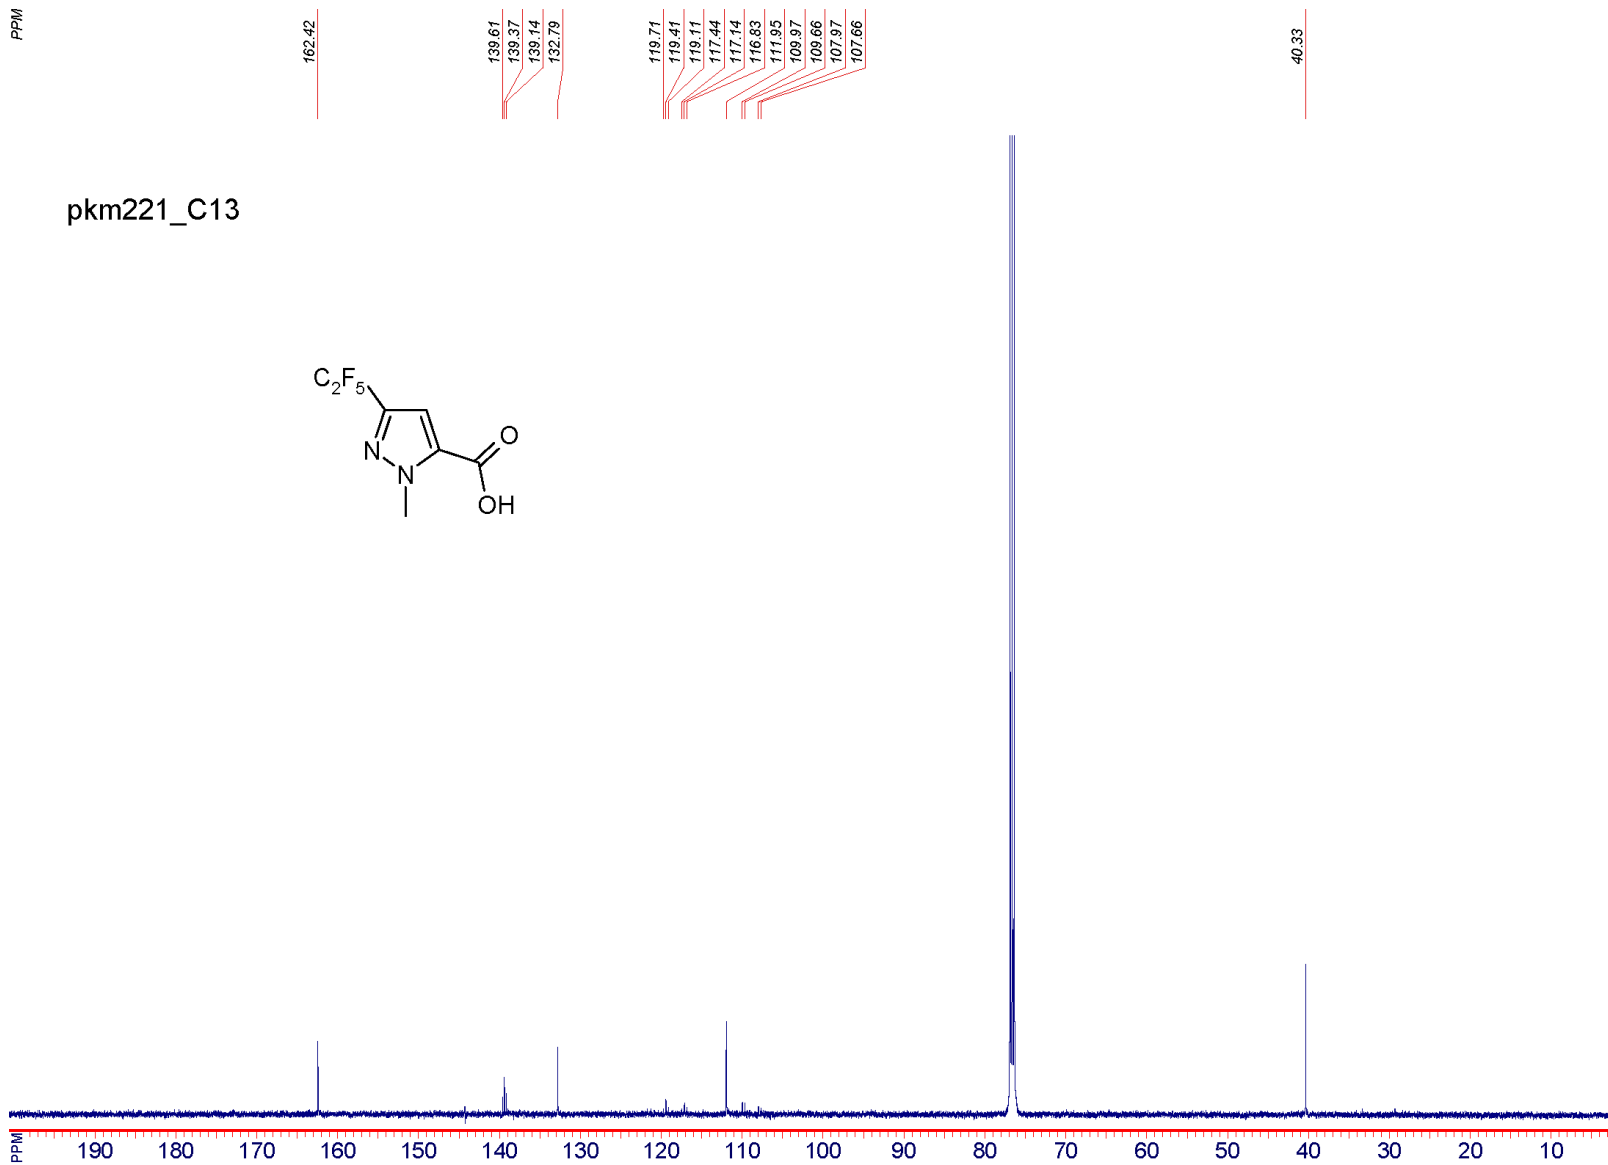

|                       |                |                  |           |                            |                                      |
|-----------------------|----------------|------------------|-----------|----------------------------|--------------------------------------|
| File name: pkm221_C13 | Operator: root | SF: 125.7126 MHz | NSC: 3421 | PW: 0.00 usec, RG: 51200   | SI: 65536                            |
| Date: 31-May-2014     | Solvent: dms0  | SW: 32680 Hz     | TE: 0 K   | AQ: 1.57 sec, RD: 0.00 sec | Parameter file, XWIN-NMR Version 3.5 |

PPM

-65.24

-113.90

Pkm221\_m\_F19.fid

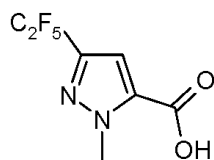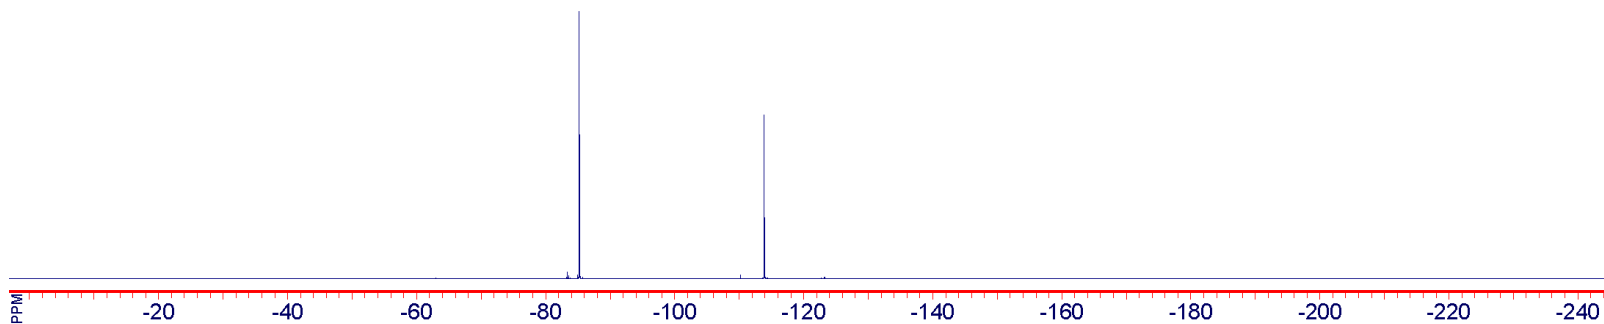

|                             |                |                  |           |                            |           |
|-----------------------------|----------------|------------------|-----------|----------------------------|-----------|
| File name: Pkm221_m_F19.fid | Operator:      | SF: 376.3189 MHz | NSC: 0    | PW: 3.00 usec, RG: 32      | SI: 65536 |
| Date: 20-May-2014           | Solvent: cdcl3 | SW: 94118 Hz     | TE: 293 K | AQ: 0.34 sec, RD: 0.00 sec | □         |
